# Supplementary material for: Incorporation of CF3-pseudoprolines into polyproline type II foldamers confers promising biophysical features
Source: Royal Society of Chemistry journal article supplement (doi:10.1039/d4cc02895c), 2024-01-01
Supplement: d4cc02895c1.pdf [file d4cc02895c1.pdf]

## Supporting Information

### Incorporation of CF<sub>3</sub>-pseudoprolines into polyproline type II foldamers confers promising biophysical features

Chloé Cayrou, Astrid Walrant, Delphine Ravault, Karine Guitot, Sylvie Noinville, Sandrine Sagan,  
Thierry Brigaud, Simon Gonzalez,\* Sandrine Ongerì, and Grégory Chaume\*

#### TABLE OF CONTENTS

---

|                                                                                                 |     |
|-------------------------------------------------------------------------------------------------|-----|
| Table of contents.....                                                                          | S1  |
| I. Material and methods.....                                                                    | S4  |
| II. Synthesis of CF <sub>3</sub> ΨPro.....                                                      | S6  |
| III. Synthesis of the building block for SPPS.....                                              | S7  |
| III.1 General procedure.....                                                                    | S7  |
| III.1.1 General procedure A for acyl chloride synthesis.....                                    | S7  |
| III.1.2 General procedure B for peptide coupling using acyl chloride activation.....            | S7  |
| III.1.3 General procedure C for the benzyl ester deprotection by hydrogenation.....             | S7  |
| III.2 Synthesis of the building block L-L, Fmoc-L-Pro-CF <sub>3</sub> ΨPro-OH.....              | S8  |
| III.3 Synthesis of the building block D-L, Fmoc-D-Pro-CF <sub>3</sub> ΨPro-OH.....              | S10 |
| IV. Peptide synthesis of oligomers 1-14 by SPPS.....                                            | S12 |
| IV.1 General procedure.....                                                                     | S12 |
| IV.1.1 General procedure D for the manual synthesis of peptides.....                            | S12 |
| IV.1.2 General procedure E for the automated synthesis of peptides with LibertyBlue® (CEM)..... | S12 |
| IV.2 Peptide synthesis.....                                                                     | S13 |
| IV.3 HRMS values of the synthesized peptides.....                                               | S14 |
| IV.4 UV-purity of peptides 1-14 by UPLC-MS.....                                                 | S15 |
| V. NMR characterization of tripeptides 2-5, hexamer 7 and nonamer 14.....                       | S20 |
| V.1 Trimers.....                                                                                | S20 |
| V.1.1 Trimer 2, one rotamer (>95%).....                                                         | S20 |
| V.1.2 Trimer 3, four rotamers (65/15/13/7).....                                                 | S22 |
| V.1.3 Trimer 4, three rotamers (70/22/8).....                                                   | S24 |
| V.1.4 Trimer 5, one rotamer (>95%).....                                                         | S26 |
| V.2 Hexamers.....                                                                               | S28 |

|         |                                                                                |     |
|---------|--------------------------------------------------------------------------------|-----|
| V.2.1   | Hexamer 7, one rotamer (>95%) .....                                            | S28 |
| V.3     | Nonamers .....                                                                 | S30 |
| V.3.1   | Nonamer 14, one rotamer (>95%) .....                                           | S30 |
| VI.     | Synthesis and CD studies of residue chromophores .....                         | S33 |
| VI.1    | Synthesis of Ac-L-Pro-NHMe .....                                               | S33 |
| VI.1.1  | Ac-L-Pro-OBn .....                                                             | S33 |
| VI.1.2  | Ac-L-Pro-OH .....                                                              | S33 |
| VI.1.3  | Ac-L-Pro-NHMe .....                                                            | S34 |
| VI.2    | Synthesis of Ac-CF <sub>3</sub> ΨPro-OBn.....                                  | S34 |
| VI.2.1  | Ac-CF <sub>3</sub> ΨPro-OBn .....                                              | S34 |
| VI.2.2  | Ac-CF <sub>3</sub> ΨPro-OH.....                                                | S35 |
| VI.2.3  | Ac-CF <sub>3</sub> ΨPro-NHMe .....                                             | S35 |
| VI.3    | Circular dichroism study .....                                                 | S36 |
| VII.    | Supplementary CD experiment .....                                              | S37 |
| VIII.   | X-ray structure of nonamer 14 .....                                            | S38 |
| VIII.1  | Crystallographic data collection, structure determination and refinement ..... | S38 |
| VIII.2  | Helical pitch .....                                                            | S42 |
| VIII.3  | Dihedral angles values .....                                                   | S43 |
| VIII.4  | Hydrogen-bonding patterns in nonamer 14.....                                   | S44 |
| VIII.5  | Electrostatic potentials mapped on Hirshfeld surface of nonamer 14 .....       | S45 |
| IX.     | Comparison of hydrophobicity by UPLC-MS retention time .....                   | S46 |
| X.      | Results of stability test with Pronase of hexamers 6-7 .....                   | S47 |
| X.1     | Test followed by UPLC-MS.....                                                  | S47 |
| X.2     | Followed by <sup>19</sup> F NMR .....                                          | S49 |
| X.3     | Positive control assay .....                                                   | S50 |
| XI.     | Results of viability assays of hexamers 6-7 .....                              | S51 |
| XII.    | NMR Spectra .....                                                              | S52 |
| XII.1   | Building blocks Fmoc-Pro-CF <sub>3</sub> ΨPro .....                            | S52 |
| XII.1.1 | CF <sub>3</sub> ΨPro .....                                                     | S52 |
| XII.1.2 | Fmoc-L-Pro-CF <sub>3</sub> ΨPro-OBn .....                                      | S56 |
| XII.1.3 | Fmoc-L-Pro-CF <sub>3</sub> ΨPro-OH .....                                       | S57 |
| XII.1.4 | Fmoc-D-Pro-CF <sub>3</sub> ΨPro-OBn.....                                       | S59 |
| XII.1.5 | Fmoc-D-Pro-CF <sub>3</sub> ΨPro-OH .....                                       | S60 |
| XII.2   | Oligomers .....                                                                | S62 |
| XII.2.1 | Trimer 2 .....                                                                 | S62 |
| XII.2.2 | Trimer 3 .....                                                                 | S64 |

|         |                                    |     |
|---------|------------------------------------|-----|
| XII.2.3 | Trimer 4 .....                     | S65 |
| XII.2.4 | Trimer 5 .....                     | S67 |
| XII.2.5 | Hexamer 7.....                     | S68 |
| XII.2.6 | Nonamer 14.....                    | S70 |
| XII.3   | Chromophores.....                  | S73 |
| XII.3.1 | Ac-Pro-NHMe.....                   | S73 |
| XII.3.2 | Ac-CF <sub>3</sub> ΨPro-NHMe ..... | S77 |
| XIII.   | Bibliography.....                  | S80 |

# I. MATERIAL AND METHODS

---

**Material.** Unless specified otherwise, solvents were used as received. L-Ser-OBn was purchased from ABCR GmbH, PPTS and Pd/C from Alfa Aesar, SOCl<sub>2</sub> from Sigma Aldrich and trifluoroacetaldehyde methyl hemiacetal from Apollo Scientific. The reactions were monitored by <sup>19</sup>F NMR or by analytical thin-layer chromatography (TLC) using silica gel 60 pre-coated aluminum plates with fluorescent indicator. Visualization was accomplished by irradiation with a UV lamp and/or staining with phosphomolybdic acid or ninhydrin. For SPPS, DIC, Oxyma Pure, piperidine and TIPS were purchased from Iris Biotech, DIPEA and TFA from ABCR, HATU, TBTU from Fluorochem, Fmoc-Pro-OH from Iris Biotech, and finally Ac<sub>2</sub>O from Sigma Aldrich. Fmoc-Rink Amide PEG AM resin (loading: 0.35 mmol/g), Fmoc-Rink Amide AM resin (loading: 0.71 mmol/g) were purchased from Iris Biotech and NovaPEG Rink Amide resin (loading: 0.49 mmol/g) from Novabiochem.

**NMR.** <sup>1</sup>H, <sup>13</sup>C, <sup>19</sup>F NMR spectra were measured on a BRUKER ADVANCE NEO 400 MHz spectrometer. NMR experiments were processed and analyzed with TOPSPIN 4.0.7 program. <sup>1</sup>H and <sup>13</sup>C chemical shifts were referenced to the residual solvent signal (CDCl<sub>3</sub>: 7.26 and 77.2 ppm, CD<sub>3</sub>OD: 3.31 and 49.0 ppm, respectively). For water samples, 4,4-dimethyl-4-silapentane-1-sulfate (DSS) was used as an internal standard for <sup>1</sup>H chemical shift (0.00 ppm). Carbon assignments were obtained from heteronuclear 2D <sup>1</sup>H-<sup>13</sup>C HSQC spectra. For <sup>19</sup>F NMR, C<sub>6</sub>F<sub>6</sub> were used as internal standard (-161.64 ppm in CDCl<sub>3</sub>, -165.37 ppm in CD<sub>3</sub>OD and -163.01 ppm in D<sub>2</sub>O). Data are reported as follows: chemical shift (δ ppm), multiplicity (s = singlet, d = doublet, t = triplet and m = multiplet), coupling constant (Hz), integration. If nothing is specified for the multiplicity then the signal is a multiplet.

**Infrared spectra.** Infrared spectra were performed on a Perkin Elmer Spectrum Two FT-IR.

**Specific rotations.** Specific rotation was measured on a ANTON PAAR MCP 200 polarimeter.

**High-Resolution Mass Spectra (HRMS).** HRMS were recorded by electron spray (MS-ESI) techniques using QToF Impact HD Bruker spectrometer.

**Melting points.** Melting points (uncorrected) were measured in a capillary tube on a Buchi Melting Point M560.

**UPLC-MS.** Waters ACQUITY UPLC coupled to a single quadrupole ESI-MS (Waters 3100 Mass Detector) with a column Luna C18.

**HPLC semi-preparative.** HPLC semi-preparative purifications were performed with a Luna Omega 5 μm PS C18 100Å 250 X 10 column from Phenomenex on Agilent 1260 Infinity II machine.

**Circular dichroism (CD) spectroscopy.** Far-UV circular dichroism was performed using a Jasco 815 CD Spectrometer equipped with a Peltier. Spectra were recorded over the 185-270 nm wavelength range by using a 2 mm quartz cuvette. Spectra were obtained as an average of three scans at 4°C with a 20 nm/min scanning speed and a spectrometer bandwidth of 1 nm. The peptide concentration was 100 μM in different solvents, 20 mM sodium phosphate buffer (pH 7), *n*-propanol or a mixture of both.

**Cytotoxicity assay.** Wild type Chinese Hamster Ovary cells (CHO-K1, WT, ATCC) were cultured in Dulbecco's modified Eagle's medium (DMEM F12) supplemented with 10% fetal calf serum (FCS), penicillin (100,000 IU/L), streptomycin (100,000 IU/L), and amphotericin B (1 mg/L) in a humidified atmosphere containing 5% CO<sub>2</sub> at

37 °C. CHO-K1 cells were seeded in a 96-well cell culture plate the day prior to the experiments (15,000 for 1 h assay and 7,000 for 24 h). The cells are incubated with 1, 5, 10, 25, 100  $\mu$ M peptide for 1 h or 24 h (starting from a 1 mM peptide solution in 20 mM sodium phosphate buffer, pH 6.9 at 37°C. Three replicates were made for each condition. Cell viability was then evaluated using the CCK-8 kit (Dojindo), according to the supplier's instructions. After peptide incubation and cell washing with HBSS, a 10% solution of CCK-8 reagent in DMEM was added. After 2 h incubation at 37°C, the absorbance at 450 nm was determined using a microplate reader (FLUOstar, BMG Labtech) DMEM F12 was used as 0% cytotoxicity control and 0.1% Triton X-100 in DMEM F12 as a 100% cytotoxicity control.

**Stability test with Pronase.** Pronase powder was purchased from Sigma-Aldrich. Hexamers **6** and **7** (final concentration: 200  $\mu$ M) were diluted in a solution of Pronase (final concentration: 2.5  $\mu$ g/mL) in 50 mM Tris, 10 mM CaCl<sub>2</sub>, 150 mM NaCl, 0.05% (w/v) Brij 35, pH 7.5 and placed under stirring at 37°C. The amount of intact peptide was quantified over time (5 min, 15 min, 30 min, 1 h, 1 h 30, 2 h, 3 h, 24 h and 48 h) by HPLC and by <sup>19</sup>F NMR in the case of hexamer **7**. Analyses were done in triplicate.

For HPLC monitoring, at each time point 20  $\mu$ L of the enzymatic reaction was transferred in a HPLC vial containing 20  $\mu$ L of 1% TFA solution in water. 10  $\mu$ L of this quenched reaction was injected and the sample was analyzed with a gradient of 10 to 60% of acetonitrile in 10 min. The UV trace at 214 nm was used for peptide quantification. The area of peaks at 4.5 min (hexamer **6**) and 6.9 min (hexamer **7**) were integrated and used for quantification.

To monitor the degradation by <sup>19</sup>F NMR, analyses were conducted at 37°C in 5 mm tube with a final volume of 500  $\mu$ L containing buffer and 10% of D<sub>2</sub>O. <sup>19</sup>F NMR spectra were recorded at 37°C with a total of 64 scans for each spectrum. The data were multiplied with an exponential window function with 3 Hz line broadening prior to Fourier transformation. All fluorine signals were integrated and the residual TFA present in the sample was used as an internal standard. The ratio of fluorine signal integration from peptide over TFA was used to quantify the amount of peptide during time.

## II. SYNTHESIS OF CF<sub>3</sub>ΨPRO

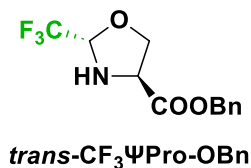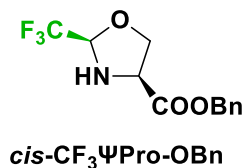

To a solution of L-serine benzyl ester hydrochloride (5.0 g, 21.58 mmol, 1.0 equiv.) in toluene (70 mL) were added trifluoroacetaldehyde methyl hemiacetal (2.17 mL, 22.67 mmol, 1.05 equiv.) and PPTS (543 mg, 2.16 mmol, 0.1 equiv.) at room temperature. The reaction mixture was stirred at 90°C for 1 h. Then a Dean Stark apparatus was added and the reaction mixture was heated at 140°C for 2 h 30. Trifluoroacetaldehyde methyl hemiacetal (1.0 mL, 10.79 mmol, 0.5 equiv.) was added and the reaction was left stirring for additional 1 h 30 under the same condition. The reaction mixture was filtered and evaporated under reduced pressure. The crude was purified using flash chromatography on silica gel using a gradient of cyclohexane/ethyl acetate as eluent (from (100/0) to (70/30) in 25 min then from (70/30) to (60/40) in 5 min and finally from (60/40) to (0/100) in 5 min) to give 0.48 g (8% yield) of the *cis*-CF<sub>3</sub>ΨPro-OBn as white solid and 4.18 g (70% yield) of the *trans*-CF<sub>3</sub>ΨPro-OBn as a colorless oil.

***cis*-CF<sub>3</sub>ΨPro-OBn:** white solid; <sup>1</sup>H NMR (400 MHz, CDCl<sub>3</sub>): δ 3.05 (m, 1 H, NH), 4.10-4.20 (m, 3 H, H<sub>α</sub>, H<sub>β</sub>-Ha and H<sub>β</sub>-Hb), 4.95 (dq, *J* = 8.2, 5.0 Hz, 1 H, H<sub>δ</sub>), 5.21 (s, 2 H, CH<sub>2</sub> OBn-Ha and CH<sub>2</sub> OBn-Hb), 7.34-7.37 (m, 5 H, OBn arom.); <sup>13</sup>C NMR (100.5 MHz, CDCl<sub>3</sub>): δ 59.0 (CH, C<sub>α</sub>), 67.7 (CH<sub>2</sub>, CH<sub>2</sub> OBn), 69.0 (CH<sub>2</sub>, C<sub>β</sub>), 87.9 (q, *J* = 34.4 Hz, CH, C<sub>δ</sub>), 122.9 (q, *J* = 283.1 Hz, C, CF<sub>3</sub>), 128.5 (CH, OBn arom.), 128.8 (CH, OBn arom.), 128.8 (CH, OBn arom.), 135.2 (C, OBn arom.), 170.6 (C, C=O); <sup>19</sup>F NMR (376.2 MHz, CDCl<sub>3</sub>): δ -80.7 (d, *J* = 5.6 Hz, CF<sub>3</sub>).

***trans*-CF<sub>3</sub>ΨPro-OBn:** Colorless oil; <sup>1</sup>H NMR (400 MHz, CDCl<sub>3</sub>): δ 3.34 (m, 1 H, NH), 3.84 (dd, *J* = 7.8, 6.4 Hz, 1 H, H<sub>β</sub>-Ha), 4.11 (ddd, *J* = 7.8, 7.3, 6.4 Hz, 1 H, H<sub>α</sub>), 4.29 (t, *J* = 7.8 Hz, 1 H, H<sub>β</sub>-Hb), 5.09 (dq, *J* = 8.1, 5.5 Hz, 1 H, H<sub>δ</sub>), 5.22 (s, 2 H, CH<sub>2</sub> OBn-Ha and CH<sub>2</sub> OBn-Hb), 7.31-7.41 (m, 5H, OBn arom.); <sup>13</sup>C NMR (100.5 MHz, CDCl<sub>3</sub>): δ 58.8 (CH, C<sub>α</sub>), 68.0 (CH<sub>2</sub>, CH<sub>2</sub> OBn), 69.8 (CH<sub>2</sub>, C<sub>β</sub>), 87.9 (q, *J* = 34.2 Hz, CH, C<sub>δ</sub>), 123.3 (q, *J* = 283.3 Hz, C, CF<sub>3</sub>), 128.5 (CH, OBn arom.), 128.9 (CH, OBn arom.), 128.9 (CH, OBn arom.), 134.9 (C, OBn arom.), 171.4 (C, C=O); <sup>19</sup>F NMR (376.2 MHz, CDCl<sub>3</sub>): δ -81.8 (d, *J* = 5.5 Hz, CF<sub>3</sub>).

The obtained NMR data are in accordance with the literature.<sup>1</sup>

### III. SYNTHESIS OF THE BUILDING BLOCK FOR SPSS

---

#### III.1 General procedure

##### III.1.1 General procedure A for acyl chloride synthesis

To a 0.2 M solution of Fmoc-Pro-OH (1.0 equiv.) in dried dichloromethane under argon, was added thionyl chloride (13.8 equiv.). The reaction mixture was sonicated at room temperature until the complete disappearance of the precipitate (from 30 min to 1 h) and then evaporated under vacuum. Co-evaporations with pentane were performed in order to remove the excess of thionyl chloride to give the Fmoc-Pro-Cl as a white solid directly used without further purification.

##### III.1.2 General procedure B for peptide coupling using acyl chloride activation

To a solution of fluorinated *cis*-CF<sub>3</sub>ΨPro-OBn or *trans*-CF<sub>3</sub>ΨPro-OBn pseudoproline (1 equiv.) in dried dichloromethane was added Fmoc-L-Pro-Cl or Fmoc-D-Pro-Cl (1.1 equiv. or 3.0 equiv.). The reaction mixture was stirred overnight at room temperature under argon atmosphere. After evaporation under vacuum, a purification by chromatography on silica gel gave pure products Fmoc-L-Pro-CF<sub>3</sub>ΨPro-OBn and Fmoc-D-Pro-CF<sub>3</sub>ΨPro-OBn in 76 and 97% yield, respectively.

##### III.1.3 General procedure C for the benzyl ester deprotection by hydrogenation

To a solution of protected Fmoc-L-Pro-CF<sub>3</sub>ΨPro-OBn or Fmoc-D-Pro-CF<sub>3</sub>ΨPro-OBn dipeptide (1 equiv.) in methanol was added 10% in weight palladium on carbon, 10% Pd. The mixture was stirred under 1 bar of hydrogen gas for 30 min to 50 min. The reaction was monitored by TLC (cyclohexane/ethyl acetate, 70/30) and was stopped when the starting material disappeared. Then, palladium was filtered over Celite® and methanol was removed under reduced pressure to give pure building blocks Fmoc-L-Pro-CF<sub>3</sub>ΨPro-OH and Fmoc-D-Pro-CF<sub>3</sub>ΨPro-OH as a white solid used directly without further purification in 97% and 100% yield, respectively.

### III.2 Synthesis of the building block L-L, Fmoc-L-Pro-CF<sub>3</sub>ΨPro-OH

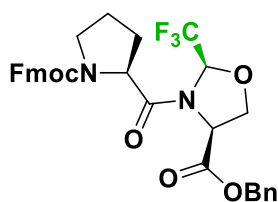

Fmoc-L-Pro-CF<sub>3</sub>ΨPro-OBn

The reaction was performed following the general procedure A and B starting with Fmoc-L-Pro-OH (405 mg, 1.20 mmol, 1.1 equiv.), *cis*-CF<sub>3</sub>ΨPro-OBn (300 mg, 1.09 mmol, 1.0 equiv.) in dried dichloromethane (7 mL). Purification by chromatography on silica gel (cyclohexane/ethyl acetate, 80/20 as eluent) give a pure dipeptide Fmoc-L-Pro-CF<sub>3</sub>ΨPro-OBn (492 mg, 76%) as a 16/84 mixture of Fmoc *cis/trans* rotational isomers in CDCl<sub>3</sub> at 298 K.

White solid; **mp** 56-59°C; **Rf** 0.17 (80/20 cyclohexane/ethyl acetate); **[α]<sup>20</sup><sub>D</sub>** -68.9° (c 1.0, CHCl<sub>3</sub>); **IR** (neat) 3052, 2949, 2884, 1774, 1683, 1422, 1281, 1121, 760 cm<sup>-1</sup>; **<sup>1</sup>H NMR** (400 MHz, CDCl<sub>3</sub>, 298 K): (*84/16 mixture of rotational isomers*) (*major conformer*) δ 1.95 (m, 1 H, H<sub>γ</sub> Pro-Ha), 2.03 (m, 1 H, H<sub>β</sub> Pro-Ha), 2.14 (m, 1 H, H<sub>β</sub> Pro-Hb), 2.28 (m, 1 H, H<sub>γ</sub> Pro-Hb), 3.54 (m, 1 H, H<sub>δ</sub> Pro-Ha), 3.69 (m, 1 H, H<sub>δ</sub> Pro-Hb), 4.23 (t, *J* = 7.2 Hz, 1 H, CH Fmoc), 4.29-4.40 (m, 4 H, H<sub>β</sub> CF<sub>3</sub>ΨPro-Ha, CH<sub>2</sub> Fmoc-Ha, CH<sub>2</sub> Fmoc-Hb and H<sub>α</sub> Pro), 4.51 (dd, *J* = 8.7, 1.2 Hz, 1 H, H<sup>β</sup> ΨPro-Hb), 5.12 (m, 1 H, H<sub>α</sub> CF<sub>3</sub>ΨPro), 5.15 (d, *J* = 12.2 Hz, 1 H, CH<sub>2</sub> OBn-Ha), 5.21 (d, *J* = 12.2 Hz, 1 H, CH<sub>2</sub> OBn-Hb), 6.21 (q, *J* = 5.0 Hz, 1 H, H<sub>δ</sub> CF<sub>3</sub>ΨPro), 7.28-7.37 (m, 7 H, Fmoc arom. and OBn arom.), 7.40 (t, *J* = 7.3 Hz, 2 H, Fmoc arom.), 7.58 (dd, *J* = 7.8, 7.3 Hz, 2 H, Fmoc arom.), 7.77 (d, *J* = 7.8 Hz, 2 H, Fmoc arom.); (*minor conformer*) δ 1.77 (m, 1 H, H<sub>γ</sub> Pro-Ha), 1.85 (m, 1 H, H<sub>β</sub> Pro-Ha), 2.02 (m, 1 H, H<sub>β</sub> Pro-Hb), 2.04 (m, 1 H, H<sub>γ</sub> Pro-Hb), 3.44 (m, 1 H, H<sub>δ</sub> Pro-Ha), 3.64 (m, 1 H, H<sub>δ</sub> Pro-Hb), 4.00 (m, 1 H, H<sub>α</sub> Pro), 4.13-4.19 (m, 2 H, H<sub>β</sub> CF<sub>3</sub>ΨPro), 4.23 (t, *J* = 5.5 Hz, 1 H, CH Fmoc), 4.42 (dd, *J* = 10.9, 5.5 Hz, 1 H, CH<sub>2</sub> Fmoc-Ha), 4.66 (dd, *J* = 10.9, 5.5 Hz, 1 H, CH<sub>2</sub> Fmoc-Hb), 4.95 (t, *J* = 8.0 Hz, 1 H, CF<sub>3</sub>ΨPro), 5.07 (m, 1 H, H<sub>δ</sub> CF<sub>3</sub>ΨPro), 5.09 (d, *J* = 12.2 Hz, 1 H, CH<sub>2</sub> OBn-Ha), 5.15 (d, *J* = 12.2 Hz, 1 H, CH<sub>2</sub> OBn-Hb), 7.28-7.43 (m, 9 H, Fmoc arom., OBn arom.), 7.49 (t, *J* = 7.3 Hz, 2 H, Fmoc arom.), 7.77 (d, *J* = 7.8 Hz, 2 H, Fmoc arom.); **<sup>13</sup>C NMR** (100.5 MHz, CDCl<sub>3</sub>, 298 K): (*84/16 mixture of rotational isomers*) (*major conformer*) δ 25.0 (CH<sub>2</sub>, C<sub>γ</sub> Pro), 30.4 (CH<sub>2</sub>, C<sub>β</sub> Pro), 47.1 (CH<sub>2</sub>, C<sub>δ</sub> Pro), 47.2 (CH, CH Fmoc), 57.0 (CH, C<sub>α</sub> CF<sub>3</sub>ΨPro), 58.5 (CH, C<sub>α</sub> Pro), 67.7 (CH<sub>2</sub>, CH<sub>2</sub> OBn), 67.9 (CH<sub>2</sub>, CH<sub>2</sub> Fmoc), 69.1 (CH<sub>2</sub>, C<sub>β</sub> CF<sub>3</sub>ΨPro), 85.2 (q, *J* = 34.9 Hz, CH, C<sub>δ</sub> CF<sub>3</sub>ΨPro), 120.1 (2 x CH, Fmoc arom.), 123.0 (q, *J* = 286.6 Hz, C, CF<sub>3</sub>), 125.2 (CH, Fmoc arom), 125.3 (CH, Fmoc arom), 127.2 (2 x CH, Fmoc arom.), 127.9 (2 x CH, Fmoc arom.), 128.3 (2 x CH, OBn arom.), 128.6 (CH, OBn arom.), 128.7 (2 x CH, OBn arom.), 135.1 (C, OBn arom.), 141.4 (2 x C, Fmoc arom.), 143.8 (C, Fmoc arom.), 144.0 (C, Fmoc arom.), 155.4 (C, C=O), 168.3 (C, C=O), 172.9 (C, C=O); (*minor conformer*) δ 23.2 (CH<sub>2</sub>, C<sub>γ</sub> Pro), 31.7 (CH<sub>2</sub>, C<sub>β</sub> Pro), 47.5 (CH<sub>2</sub>, C<sub>δ</sub> Pro), 47.7 (CH, CH Fmoc), 56.7 (CH, C<sub>α</sub> CF<sub>3</sub>ΨPro), 57.8 (CH, C<sub>α</sub> Pro), 66.9 (CH<sub>2</sub>, CH<sub>2</sub> Fmoc), 67.7 (CH<sub>2</sub>, CH<sub>2</sub> OBn), 68.5 (CH<sub>2</sub>, C<sub>β</sub> CF<sub>3</sub>ΨPro), 84.4\* (q, *J* = 34.9 Hz, CH, C<sub>δ</sub> CF<sub>3</sub>ΨPro), 120.2 (2 x CH, Fmoc arom.), (C, CF<sub>3</sub>)\*\*, 124.7 (CH, Fmoc arom.), 124.9 (CH, Fmoc arom.), 127.2 (2 x CH, Fmoc arom.), 128.4 (2 x CH, OBn arom.), 128.6 (CH, OBn arom.), 128.7 (2 x CH, OBn arom.), 135.1 (C, OBn arom.), 141.3 (2 x C, Fmoc arom.), 143.8 (C, Fmoc arom.), 144.0 (C, Fmoc arom.), 155.4 (C, C=O), 168.0 (C, C=O), 172.2 (C, C=O); **<sup>19</sup>F NMR** (376.2 MHz, CDCl<sub>3</sub>, 298 K): (*84/16 mixture of rotational isomers*) (*major conformer*) δ -78.63 (d, *J* = 4.7 Hz, CF<sub>3</sub>), (*minor conformer*) δ -78.35 ppm (d, *J* = 5.0 Hz, CF<sub>3</sub>); **HRMS** (ESI-TOF) *m/z* [M + Na]<sup>+</sup> calculated for C<sub>32</sub>H<sub>29</sub>F<sub>3</sub>N<sub>2</sub>O<sub>6</sub>Na: 617.1870, found: 617.1871.

\* Some peaks are not visible in <sup>13</sup>C. Assignment was possible using 2D NMR (HSQC and HMQC).



\*\* not observed

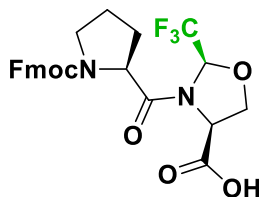

**Fmoc-L-Pro-CF<sub>3</sub>ΨPro-OH**

The reaction was performed following the general procedure C starting with Fmoc-L-Pro-*cis*-CF<sub>3</sub>ΨPro-OBn (3.87 g, 6.51 mmol, 1.0 equiv.) in methanol (190 mL) for 50 min to give pure building block Fmoc-L-Pro-CF<sub>3</sub>ΨPro-OH (3.28 g, quantitative) as a 25/75 mixture of Fmoc *cis/trans* rotational isomers in CD<sub>3</sub>OD at 298 K.

White solid; **mp** 141°C; **Rf** 0.13 (90/10 dichloromethane/methanol); **[α]<sup>20</sup><sub>D</sub>** -52.45 (c 1.0, MeOH); **IR** (neat) 3450, 2982, 1751, 1687, 1425, 1287, 1153, 1121, 741 cm<sup>-1</sup>; **<sup>1</sup>H NMR** (400 MHz, CD<sub>3</sub>OD, 298 K) (75/25 mixture of rotational isomers) (*major conformer*) δ 1.91 (m, 1 H, H<sub>γ</sub> Pro-Ha), 2.04 (m, 1 H, H<sub>β</sub> Pro-Ha), 2.13-2.26 (m, 2 H, H<sub>β</sub> Pro-Hb and H<sub>γ</sub> Pro-Hb), 3.39-3.63 (m, 2 H, H<sub>δ</sub> Pro), 4.12-4.38 (m, 4 H, CH Fmoc, CH<sub>2</sub> Fmoc-Ha, H<sub>β</sub> CF<sub>3</sub>ΨPro), 4.39-4.60 (m, 2 H, H<sub>α</sub> Pro and CH<sub>2</sub> Fmoc-Hb), 4.99 (t, *J* = 8.1 Hz, 1 H, H<sub>α</sub> CF<sub>3</sub>ΨPro), 6.28 (m, 1 H, H<sub>δ</sub> CF<sub>3</sub>ΨPro), 7.31 (t, *J* = 7.5 Hz, 2 H, Fmoc arom.), 7.39 (t, *J* = 7.5 Hz, 2 H, Fmoc arom.), 7.61 (t, *J* = 7.6 Hz, 2 H, Fmoc arom.), 7.80 (d, *J* = 7.5 Hz, 2 H, Fmoc arom.); (*minor conformer*) δ 1.89-2.11 (m, 4 H, H<sub>γ</sub> Pro and H<sub>β</sub> Pro), 3.39-3.63 (m, 2 H, H<sub>δ</sub> Pro), 4.12-4.38 (m, 4 H, CH Fmoc, H<sub>α</sub> Pro, CH<sub>2</sub> Fmoc), 4.39-4.60 (m, 2 H, H<sub>β</sub> CF<sub>3</sub>ΨPro), 4.89 (m, 1 H, H<sub>α</sub> CF<sub>3</sub>ΨPro), 5.51 (m, 1 H, H<sub>δ</sub> CF<sub>3</sub>ΨPro), 7.25-7.43 (m, 4 H, Fmoc arom.), 7.49-7.59 (m, 2 H, Fmoc arom.), 7.74-7.89 (m, 2 H, Fmoc arom.); **<sup>13</sup>C NMR** (100.5 MHz, CD<sub>3</sub>OD, 298 K): (75/25 mixture of rotational isomers) (*major conformer*) δ 25.7 (CH<sub>2</sub>, C<sub>γ</sub> Pro), 31.3 (CH<sub>2</sub>, C<sub>β</sub> Pro), 48.0 (CH<sub>2</sub>, C<sub>δ</sub> Pro), 48.3 (CH, CH Fmoc), 58.4 (CH, C<sub>α</sub> CF<sub>3</sub>ΨPro), 59.6 (CH, C<sub>α</sub> Pro), 68.8 (CH<sub>2</sub>, C<sub>β</sub> CF<sub>3</sub>ΨPro), 70.2 (CH<sub>2</sub>, CH<sub>2</sub> Fmoc), 86.2 (q, *J* = 35.0 Hz, CH, C<sub>δ</sub> CF<sub>3</sub>ΨPro), 120.9 (CH, Fmoc arom.), 120.9 (CH, Fmoc arom.), 124.4 (q, *J* = 286.3 Hz, C, CF<sub>3</sub>), 126.1 (2 x CH, Fmoc arom.), 128.2 (2 x CH, Fmoc arom.), 128.8 (2 x CH, Fmoc arom.), 142.5 (C, Fmoc arom.), 142.6 (C, Fmoc arom.), 145.1 (C, Fmoc arom.), 145.2 (C, Fmoc arom.), 156.7 (C, C=O), 171.4 (C, C=O), 174.8 (C, C=O); (*minor conformer*) δ 24.2 (CH<sub>2</sub>, C<sub>γ</sub> Pro), 32.5 (CH<sub>2</sub>, C<sub>β</sub> Pro), 48.3 (CH, CH Fmoc), 48.4 (CH<sub>2</sub>, C<sub>δ</sub> Pro), 58.3 (CH, C<sub>α</sub> CF<sub>3</sub>ΨPro), 59.0 (CH, C<sub>α</sub> Pro), 68.3 (CH<sub>2</sub>, C<sub>β</sub> CF<sub>3</sub>ΨPro), 69.8 (CH<sub>2</sub>, CH<sub>2</sub> Fmoc), 85.7 (m, CH, C<sub>δ</sub> CF<sub>3</sub>ΨPro), 121.1 (2 x CH, Fmoc arom.), (C, CF<sub>3</sub>)\*, 125.0 (CH, Fmoc arom.), 126.2 (CH, Fmoc arom.), 128.0 (2 x CH, Fmoc arom.), 128.7 (CH, Fmoc arom.), 128.9 (CH, Fmoc arom.), 142.4 (2 x C, Fmoc arom.), 145.2 (C, Fmoc arom.), 145.3 (C, Fmoc arom.), 155.6 (C, C=O), 171.2 (C, C=O), 174.3 (C, C=O); **<sup>19</sup>F NMR** (CD<sub>3</sub>OD, 376.2 MHz, 298 K): (75/25 mixture of rotational isomers) (*major conformer*) δ -79.98 (d, *J* = 5.2 Hz, CF<sub>3</sub>); (*minor conformer*) δ -79.41 (d, *J* = 4.5 Hz, CF<sub>3</sub>); **HRMS** (ESI-TOF) *m/z* [M + Na]<sup>+</sup> calculated for C<sub>25</sub>H<sub>23</sub>F<sub>3</sub>N<sub>2</sub>O<sub>6</sub>Na: 527.1400, found: 527.1402.

\* not observed

### III.3 Synthesis of the building block D-L, Fmoc-D-Pro-CF<sub>3</sub>ΨPro-OH

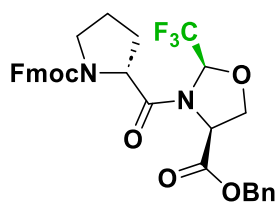

**Fmoc-D-Pro-CF<sub>3</sub>ΨPro-OBn**

The reaction was performed following the general procedure A and B starting with Fmoc-D-Pro-OH (2.54 g, 7.56 mmol, 3.0 equiv.), *cis*-CF<sub>3</sub>ΨPro-OBn (700 mg, 2.52 mmol, 1.0 equiv.) in dried dichloromethane (16 mL). Purification by chromatography on silica gel (70/30 cyclohexane/ethyl acetate as eluent) gave pure dipeptide Fmoc-D-Pro-CF<sub>3</sub>ΨPro-OBn (1.46 g, 97%) as a 10/90 mixture of Fmoc *cis/trans* rotational isomers in CDCl<sub>3</sub> at 298 K.

White solid; **mp** 56-59°C; **Rf** 0.14 (80/20 cyclohexane/ethyl acetate); [ $\alpha$ ]<sup>20</sup><sub>D</sub> -71.7° (c 0.59, CHCl<sub>3</sub>); **IR** (neat) 3056, 2957, 1751, 1687, 1421, 1183, 1151, 741 cm<sup>-1</sup>; **<sup>1</sup>H NMR** (400 MHz, CDCl<sub>3</sub>, 298 K): (90/10 mixture of rotational isomers) (*major conformer*)  $\delta$  1.78-2.04 (m, 3 H, H<sub>β</sub> Pro and H<sub>γ</sub> Pro-Ha), 2.23 (m, 1 H, H<sub>γ</sub> Pro-Hb), 3.51 (m, 1 H, H<sub>δ</sub> Pro-Ha), 3.65 (m, 1 H, H<sub>δ</sub> Pro-Hb), 4.18-4.39 (m, 4 H, CH Fmoc, H<sub>α</sub> Pro, H<sub>β</sub> CF<sub>3</sub>ΨPro), 4.45-4.60 (m, 2 H, CH<sub>2</sub> Fmoc), 5.21 (dd, 2 H, CH<sub>2</sub> OBn), 5.54 (dd, *J* = 8.2, 4.7 Hz, 1 H, H<sub>α</sub> CF<sub>3</sub>ΨPro), 5.99 (q, *J* = 5.0 Hz, 1 H, H<sub>δ</sub> CF<sub>3</sub>ΨPro), 7.27-7.45 (m, 9 H, Fmoc arom. and OBn arom.), 7.56 (m, 2 H, Fmoc arom.), 7.76 (d, *J* = 7.6 Hz, 2 H, Fmoc arom.); (*minor conformer: too low to be observed*); **<sup>13</sup>C NMR** (100.5 MHz, CDCl<sub>3</sub>, 298 K): (90/10 mixture of rotational isomers) (*major conformer*)  $\delta$  25.0 (CH<sub>2</sub>, C<sub>γ</sub> Pro), 30.7 (CH<sub>2</sub>, C<sub>β</sub> Pro), 47.2 (CH<sub>2</sub>, C<sub>δ</sub> Pro and CH, CH Fmoc), 58.3 (2 x CH, C<sub>α</sub> Pro and C<sub>α</sub> CF<sub>3</sub>ΨPro), 67.8 (CH<sub>2</sub>, C<sub>β</sub> CF<sub>3</sub>ΨPro), 68.4 (CH<sub>2</sub>, CH<sub>2</sub> OBn), 70.6 (CH<sub>2</sub>, CH<sub>2</sub> Fmoc), 84.2 (q, *J* = 36.2 Hz, CH, C<sub>δ</sub> CF<sub>3</sub>ΨPro), 120.2 (2 x CH, Fmoc arom.), (C, CF<sub>3</sub>)\*, 125.2 (CH, Fmoc arom), 125.3 (CH, Fmoc arom), 127.2 (2 x CH, Fmoc arom.), 127.9 (2 x CH, Fmoc arom.), 128.8 (CH, OBn arom.), 128.9 (2 x CH, OBn arom.), 129.0 (2 x CH, OBn arom.), 134.7 (C, OBn arom.), 141.4 (2 x C, Fmoc arom.), 143.8 (C, Fmoc arom.), 144.1 (C, Fmoc arom.), 155.3 (C, C=O), 169.1 (C, C=O), 175.0 (C, C=O); (*minor conformer: too low to be observed*); **<sup>19</sup>F NMR** (376.2 MHz, CDCl<sub>3</sub>, 298 K): (90/10 mixture of rotational isomers) (*major conformer*)  $\delta$  -79.47 (d, *J* = 5.0 Hz, CF<sub>3</sub>), (*minor conformer*)  $\delta$  -79.41 ppm (d, *J* = 5.0 Hz, CF<sub>3</sub>); **HRMS** (ESI-TOF) *m/z* [M + Na]<sup>+</sup> calculated for C<sub>32</sub>H<sub>29</sub>F<sub>3</sub>N<sub>2</sub>O<sub>6</sub>Na: 617.1870, found: 617.1871.

\*not observed

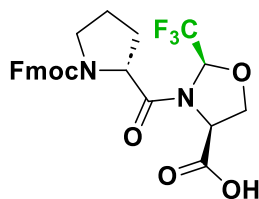

**Fmoc-D-Pro-CF<sub>3</sub>ΨPro-OH**

The reaction was performed following the general procedure C starting with Fmoc-D-Pro-*cis*-CF<sub>3</sub>ΨPro-OBn (970 mg, 1.63 mmol, 1.0 equiv.) in methanol (30 mL) for 30 min to give pure building block Fmoc-D-Pro-CF<sub>3</sub>ΨPro-OH (796 mg, 97%) as a 30/70 mixture of Fmoc *cis/trans* rotational isomers in CD<sub>3</sub>OD at 298 K.

White solid; **mp** 202°C; **Rf** 0.13 (90/10 dichloromethane/methanol); **[α]<sup>20</sup><sub>D</sub>** -50.24 (c 1.0, MeOH); **IR** (neat) 3333, 2972, 1745, 1683, 1423, 1151, 1119, 740 cm<sup>-1</sup>; **<sup>1</sup>H NMR** (400 MHz, CD<sub>3</sub>OD, 298 K) (*70/30 mixture of rotational isomers*) (*major conformer*) δ 1.90 (m, 1 H, H<sub>γ</sub> Pro-Ha), 2.03-2.20 (m, 2 H, H<sub>β</sub> Pro-Ha and H<sub>γ</sub> Pro-Hb), 2.28 (m, 1 H, H<sub>β</sub> Pro-Hb), 3.43-3.58 (m, 2 H, H<sub>δ</sub> Pro), 4.24 (m, 1 H, CH Fmoc), 4.30-4.41 (m, 2 H, H<sub>β</sub> CF<sub>3</sub>ΨPro), 4.47-4.56 (m, 3 H, CH<sub>2</sub> Fmoc and H<sub>α</sub> Pro), 5.39 (t, *J* = 6.7 Hz, 1 H, H<sub>α</sub> CF<sub>3</sub>ΨPro), 5.92 (q, *J* = 5.1 Hz, 1 H, H<sub>δ</sub> CF<sub>3</sub>ΨPro), 7.31 (t, *J* = 7.5 Hz, 2 H, Fmoc arom.), 7.40 (t, *J* = 7.6 Hz, 2 H, Fmoc arom.), 7.62 (t, *J* = 7.4 Hz, 2 H, Fmoc arom.), 7.80 (d, *J* = 7.8 Hz, 2 H, Fmoc arom.); (*minor conformer*) δ 1.79 (m, 1 H, H<sub>γ</sub> Pro-Ha), 1.96-2.07 (m, 2 H, H<sub>β</sub> Pro-Ha and H<sub>γ</sub> Pro-Hb), 2.25 (m, 1 H, H<sub>β</sub> Pro-Hb), 3.40-3.45 (m, 2 H, H<sub>δ</sub> Pro), 3.98 (m, 1 H, CH<sub>2</sub> Fmoc-Ha), 4.17-4.38 (m, 4 H, CH Fmoc, CH<sub>2</sub> Fmoc-Hb, H<sub>α</sub> Pro and H<sub>α</sub> CF<sub>3</sub>ΨPro), 4.44 (dd, *J* = 11.2, 5.1 Hz, 1 H, H<sub>β</sub> CF<sub>3</sub>ΨPro-Ha), 4.79 (dd, *J* = 11.2, 5.6 Hz, 1 H, H<sub>β</sub> CF<sub>3</sub>ΨPro-Hb), 5.78 (q, *J* = 5.1 Hz, 1 H, H<sub>δ</sub> CF<sub>3</sub>ΨPro), 7.27-7.44 (m, 4 H, Fmoc arom.), 7.57 (t, *J* = 7.2 Hz, 2 H, Fmoc arom.), 7.75-7.83 (m, 2 H, Fmoc arom.); **<sup>13</sup>C NMR** (100.5 MHz, CD<sub>3</sub>OD, 298 K): (*70/30 mixture of rotational isomers*) (*major conformer*) δ 25.7 (CH<sub>2</sub>, C<sub>γ</sub> Pro), 31.9 (CH<sub>2</sub>, C<sub>β</sub> Pro), 48.2 (CH<sub>2</sub>, C<sub>δ</sub> Pro), 48.4 (CH, CH Fmoc), 59.4 (CH, C<sub>α</sub> CF<sub>3</sub>ΨPro), 59.6 (CH, C<sub>α</sub> Pro), 68.9 (CH<sub>2</sub>, C<sub>β</sub> CF<sub>3</sub>ΨPro), 71.8 (CH<sub>2</sub>, CH<sub>2</sub> Fmoc), 85.5 (q, *J* = 35.8 Hz, CH, C<sub>δ</sub> CF<sub>3</sub>ΨPro), 121.0 (2 x CH, Fmoc arom.), 124.3 (q, *J* = 286.3 Hz, C, CF<sub>3</sub>), 126.1 (CH, Fmoc arom.), 126.2 (CH, Fmoc arom.), 128.2 (2 x CH, Fmoc arom.), 128.9 (2 x CH, Fmoc arom.), 142.6 (2 x C, Fmoc arom.), 145.1 (C, Fmoc arom.), 145.2 (C, Fmoc arom.), 156.8 (C, C=O), 171.9 (C, C=O), 175.8 (C, C=O); (*minor conformer*) δ 24.2 (CH<sub>2</sub>, C<sub>γ</sub> Pro), 32.9 (CH<sub>2</sub>, C<sub>β</sub> Pro), 48.4 (CH<sub>2</sub>, CH Fmoc), 48.8 (CH, C<sub>δ</sub> Pro), 58.8 (2 x CH, C<sub>α</sub> Pro and C<sub>α</sub> CF<sub>3</sub>ΨPro), 67.9 (CH<sub>2</sub>, C<sub>β</sub> CF<sub>3</sub>ΨPro), 71.8 (CH<sub>2</sub>, CH<sub>2</sub> Fmoc), (CH, C<sub>δ</sub> CF<sub>3</sub>ΨPro)\*, 121.0 (CH, Fmoc arom.), 121.2 (CH, Fmoc arom.), (C, CF<sub>3</sub>)\*, 125.7 (CH, Fmoc arom.), 126.2 (CH, Fmoc arom.), 128.4 (CH, Fmoc arom.), 128.9 (CH, Fmoc arom.), 129.1 (CH, Fmoc arom.), 128.9 (CH, Fmoc arom.), 142.6 (2 x C, Fmoc arom.), 144.7 (C, Fmoc arom.), 145.5 (C, Fmoc arom.), 155.7 (C, C=O), 171.3 (C, C=O), 175.2 (C, C=O); **<sup>19</sup>F NMR** (CD<sub>3</sub>OD, 376.2 MHz, 298 K): (*70/30 mixture of rotational isomers*) (*major conformer*) δ -80.63 (d, *J* = 4.7 Hz, CF<sub>3</sub>); (*minor conformer*) δ -80.55 (d, *J* = 4.6 Hz, CF<sub>3</sub>); **HRMS** (ESI-TOF) *m/z* [M + Na]<sup>+</sup> calculated for C<sub>25</sub>H<sub>23</sub>F<sub>3</sub>N<sub>2</sub>O<sub>6</sub>Na: 527.1400, found: 527.1402.

\*not observed

## IV. PEPTIDE SYNTHESIS OF OLIGOMERS 1-14 BY SPSS

---

### IV.1 General procedure

All peptides were synthesized in a plastic syringe on 0.1 mmol scale using standard Fmoc-based solid phase peptide synthesis with Rink Amide resin. Three different loadings of resins were used during this work: Fmoc-Rink Amide PEG AM resin (loading: 0.35 mmol/g, 286 mg, 0.1 mmol scale), NovaPEG Rink amide resin (loading: 0.49 mmol/g, 204 mg, 0.1 mmol scale) and Fmoc-Rink Amide AM resin (loading: 0.71 mmol/g, 141 mg, 0.1 mmol scale).

After each Fmoc cleavage or coupling, the completion of the reaction was checked by performing a Kaiser Test (for primary amine) or a Chloranil Test (secondary amine). Peptides were cleaved from the resin thanks to a TFA/TIPS/H<sub>2</sub>O (95/2.5/2.5, v/v/v) solution for 2 h. After filtration, the solvent was evaporated under air flow. Then, the crude peptides were dissolved in water, lyophilized and then purified by HPLC semi-preparative and all possess UPLC purities >95%.

#### IV.1.1 General procedure D for the manual synthesis of peptides

The loading of the resin was performed using Fmoc-L-Pro-OH (3 eq.) or Fmoc-D-Pro-OH (3 eq.) with TBTU (3 eq.) and DIPEA (5 eq.) in DMF (5 mL) for 1 h at r.t. The couplings of natural amino acids were achieved with Fmoc-L-Pro-OH (3 eq.) or Fmoc-D-Pro-OH (3 eq.) with HATU (3 eq.) and DIPEA (5 eq.) in DMF (5 mL) for 1 h at r.t. Building blocks Fmoc-L-Pro-CF<sub>3</sub>ΨPro-OH (2 eq.) or Fmoc-D-Pro-CF<sub>3</sub>ΨPro-OH (2 eq.) were coupled using DIC (3 eq.) and Oxyma (3 eq.) in DMF (5 mL) at 75°C under microwave activation (100 W) for 10-20 min. All Fmoc deprotections were carried out by piperidine in DMF (20%, v/v) for 5 then 15 min at r.t. If needed, the acetylation was performed using Ac<sub>2</sub>O (10 eq.) and DIPEA (10 eq.) in DMF (5 mL) for 2 x 30 min at r.t.

#### IV.1.2 General procedure E for the automated synthesis of peptides with LibertyBlue® (CEM)

Couplings of natural amino acid Fmoc-L-Pro-OH (5 eq., single coupling) were achieved with DIC (5 eq.), Oxyma (5 eq.) in DMF using standard coupling conditions under microwave activation (34 s at 75°C (170 W) then 210 s at 90°C (30 W)). Couplings of the building block Fmoc-L-Pro-CF<sub>3</sub>ΨPro-OH was achieved using 2.5 eq. of the building block with DIC (5 eq.) and Oxyma (5 eq.) in DMF under microwave activation (10 min at 75°C (130 W) then 5 min at 90°C (100 W)). Fmoc deprotection were carried out by piperidine (20%) in DMF under microwave activation (30 s at 75°C (155 W) then 100 s at 90°C (30 W)). If needed, the acetylation was performed manually using Ac<sub>2</sub>O (10 eq.) and DIPEA (10 eq.) in DMF (5 mL) for 2 x 30 min at r.t.

## IV.2 Peptide synthesis

The synthesis conditions and yields of the synthesized peptides are listed in the following table.

|          | Peptide   | Resin loading | General procedure | Condition of purification* | Mass (yield)    |
|----------|-----------|---------------|-------------------|----------------------------|-----------------|
| Trimers  | <b>1</b>  | 0.71 mmol/g   | D                 | 5-30% in 15 min            | 24.9 mg (71%)   |
|          | <b>2</b>  | 0.71 mmol/g   | D                 | 5-30% in 15 min            | 13.5 mg (30%)   |
|          | <b>3</b>  | 0.71 mmol/g   | D                 | 10-30% in 15 min           | 38.7 mg (93%)   |
|          | <b>4</b>  | 0.71 mmol/g   | D                 | 10-40% in 15 min           | 31.2 mg (74%)   |
|          | <b>5</b>  | 0.71 mmol/g   | D                 | 5-40% in 15 min            | 19.2 mg (46%)   |
| Hexamers | <b>6</b>  | 0.49 mmol/g   | D                 | 10-40% in 15 min           | 17.0 mg (27%)   |
|          | <b>7</b>  | 0.49 mmol/g   | E                 | 10-90% in 20 min           | 24.4 mg (31%)   |
|          | <b>8</b>  | 0.49 mmol/g   | E                 | 10-50% in 15 min           | 33.7 mg (35%)** |
|          | <b>9</b>  | 0.49 mmol/g   | D                 | 10-50% in 20 min           | 20.8 mg (16%)** |
| Nonamers | <b>10</b> | 0.35 mmol/g   | E                 | 10-70% in 15 min           | 41.9 mg (25%)   |
|          | <b>11</b> | 0.35 mmol/g   | D                 | 10-90% in 15 min           | 26.5 mg (26%)   |
|          | <b>12</b> | 0.35 mmol/g   | D                 | 10-90% in 15 min           | 55.1 mg (55%)   |
|          | <b>13</b> | 0.35 mmol/g   | D                 | 10-90% in 15 min           | 46.0 mg (46%)   |
|          | <b>14</b> | 0.35 mmol/g   | E                 | 25-65% in 20 min           | 51.5 mg (45%)   |

\*Gradient: percentage start-end of ACN + 0.1%. The co-solvent is H<sub>2</sub>O + 0.1% TFA.

\*\* Yield taking into account the TFA salt.

*Table S1: Protocols for the synthesis of oligomers 1-14 and their corresponding yields*

### IV.3 HRMS values of the synthesized peptides

| Peptide  |    | Sequence                                                                                    | HRMS                |            |           |
|----------|----|---------------------------------------------------------------------------------------------|---------------------|------------|-----------|
|          |    |                                                                                             | Ion species         | Calculated | Found     |
| Trimers  | 1  | Ac-[L-Pro] <sub>3</sub> -NH <sub>2</sub>                                                    | [M+Na] <sup>+</sup> | 373.1846   | 373.1850  |
|          | 2  | Ac-L-Pro-CF <sub>3</sub> ΨPro-L-Pro-NH <sub>2</sub>                                         | [M+Na] <sup>+</sup> | 443.1513   | 443.1515  |
|          | 3  | Ac-D-Pro-CF <sub>3</sub> ΨPro-L-Pro-NH <sub>2</sub>                                         | [M+Na] <sup>+</sup> | 443.1513   | 443.1515  |
|          | 4  | Ac-L-Pro-CF <sub>3</sub> ΨPro-D-Pro-NH <sub>2</sub>                                         | [M+Na] <sup>+</sup> | 443.1513   | 443.1518  |
|          | 5  | Ac-D-Pro-CF <sub>3</sub> ΨPro-D-Pro-NH <sub>2</sub>                                         | [M+Na] <sup>+</sup> | 443.1513   | 443.1516  |
| Hexamers | 6  | Ac-[L-Pro] <sub>6</sub> -NH <sub>2</sub>                                                    | [M+Na] <sup>+</sup> | 664.3429   | 664.3436  |
|          | 7  | Ac-[L-Pro-CF <sub>3</sub> ΨPro-L-Pro] <sub>2</sub> -NH <sub>2</sub>                         | [M+Na] <sup>+</sup> | 804.2762   | 804.2762  |
|          | 8  | H-[L-Pro-CF <sub>3</sub> ΨPro-L-Pro] <sub>2</sub> -NH <sub>2</sub>                          | [M+Na] <sup>+</sup> | 762.2659   | 762.2657  |
|          | 9  | H-[L-Pro-CF <sub>3</sub> ΨPro-L-Pro] <sub>2</sub> -OH                                       | [M+H] <sup>+</sup>  | 741.2677   | 741.2665  |
| Nonamers | 10 | Ac-[L-Pro] <sub>9</sub> -NH <sub>2</sub>                                                    | [M+Na] <sup>+</sup> | 955.5012   | 955.5023  |
|          | 11 | Ac-L-Pro-CF <sub>3</sub> ΨPro-L-Pro-[Pro] <sub>6</sub> -NH <sub>2</sub>                     | [M+H] <sup>+</sup>  | 1003.4859  | 1003.4879 |
|          | 12 | Ac-[Pro] <sub>3</sub> -L-Pro-CF <sub>3</sub> ΨPro-L-Pro-[Pro] <sub>3</sub> -NH <sub>2</sub> | [M+H] <sup>+</sup>  | 1003.4859  | 1003.4880 |
|          | 13 | Ac-[Pro] <sub>6</sub> -L-Pro-CF <sub>3</sub> ΨPro-L-Pro-NH <sub>2</sub>                     | [M+H] <sup>+</sup>  | 1003.4859  | 1003.4879 |
|          | 14 | Ac-[L-Pro-CF <sub>3</sub> ΨPro-L-Pro] <sub>3</sub> -NH <sub>2</sub>                         | [M+Na] <sup>+</sup> | 1165.4014  | 1165.4011 |

Table S2: HRMS values of oligomers 1-14

## IV.4 UV-purity of peptides 1-14 by UPLC-MS

The UV-purity of the synthesized peptides was checked by UPLC-MS and are listed in the following table.

| Peptide  |    | Sequence                                                                                                 | Purity | UPLC/MS   |          |
|----------|----|----------------------------------------------------------------------------------------------------------|--------|-----------|----------|
|          |    |                                                                                                          |        | Gradient* | Rt (min) |
| Trimers  | 1  | Ac-[L-Pro] <sub>3</sub> -NH <sub>2</sub>                                                                 | > 95%  | 10-50     | 0.65     |
|          | 2  | Ac-L-Pro- <i>cis</i> -CF <sub>3</sub> ΨPro-L-Pro-NH <sub>2</sub>                                         | > 95%  | 10-70     | 1.03     |
|          | 3  | Ac-D-Pro- <i>cis</i> -CF <sub>3</sub> ΨPro-L-Pro-NH <sub>2</sub>                                         | > 95%  | 10-50     | 0.98     |
|          | 4  | Ac-L-Pro- <i>cis</i> -CF <sub>3</sub> ΨPro-D-Pro-NH <sub>2</sub>                                         | > 95%  | 10-50     | 1.25     |
|          | 5  | Ac-D-Pro- <i>cis</i> -CF <sub>3</sub> ΨPro-D-Pro-NH <sub>2</sub>                                         | > 95%  | 10-50     | 1.08     |
| Hexamers | 6  | Ac-[L-Pro] <sub>6</sub> -NH <sub>2</sub>                                                                 | > 95%  | 10-90     | 1.34     |
|          | 7  | Ac-[L-Pro- <i>cis</i> -CF <sub>3</sub> ΨPro-L-Pro] <sub>2</sub> -NH <sub>2</sub>                         | > 95%  | 10-90     | 1.71     |
|          | 8  | H-[L-Pro- <i>cis</i> -CF <sub>3</sub> ΨPro-L-Pro] <sub>2</sub> -NH <sub>2</sub>                          | > 95%  | 10-90     | 1.27     |
|          | 9  | H-[L-Pro- <i>cis</i> -CF <sub>3</sub> ΨPro-L-Pro] <sub>2</sub> -OH                                       | > 95%  | 10-50     | 1.60     |
| Nonamers | 10 | Ac-[L-Pro] <sub>9</sub> -NH <sub>2</sub>                                                                 | > 95%  | 20-60     | 1.22     |
|          | 11 | Ac-L-Pro- <i>cis</i> -CF <sub>3</sub> ΨPro-L-Pro-[Pro] <sub>6</sub> -NH <sub>2</sub>                     | >95%   | 10-90     | 1.85     |
|          | 12 | Ac-[Pro] <sub>3</sub> -L-Pro- <i>cis</i> -CF <sub>3</sub> ΨPro-L-Pro-[Pro] <sub>3</sub> -NH <sub>2</sub> | >95%   | 10-90     | 1.80     |
|          | 13 | Ac-[Pro] <sub>6</sub> -L-Pro- <i>cis</i> -CF <sub>3</sub> ΨPro-L-Pro-NH <sub>2</sub>                     | >95%   | 10-90     | 1.80     |
|          | 14 | Ac-[L-Pro- <i>cis</i> -CF <sub>3</sub> ΨPro-L-Pro] <sub>3</sub> -NH <sub>2</sub>                         | > 95%  | 10-90     | 2.03     |

\*Gradient: percentage start-end of ACN + 0.1%. The co-solvent is H<sub>2</sub>O + 0.1% TFA.

Table S3: UV-purity at 215 nm of peptides 1-14

### UPLC Chromatograms at 215 nm:

#### Trimer 1

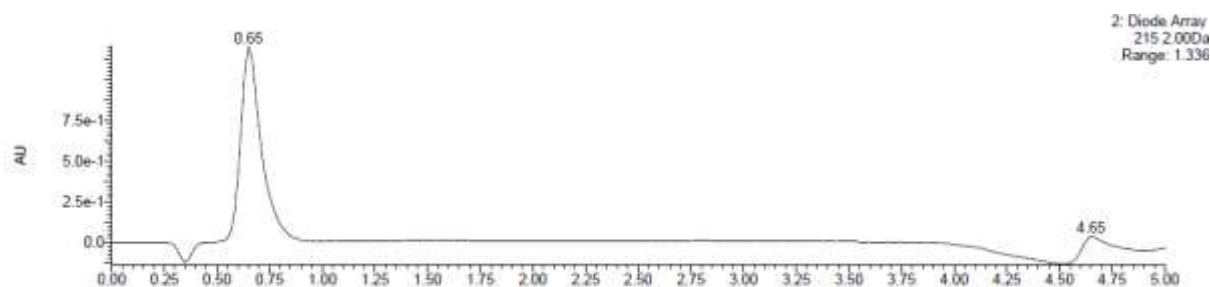

### Trimer 2

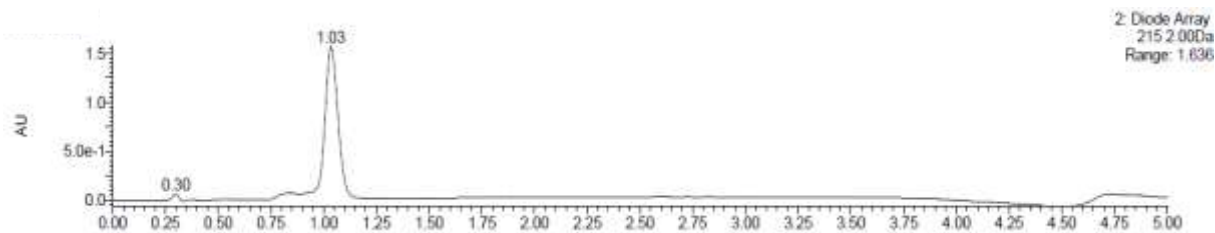

### Trimer 3

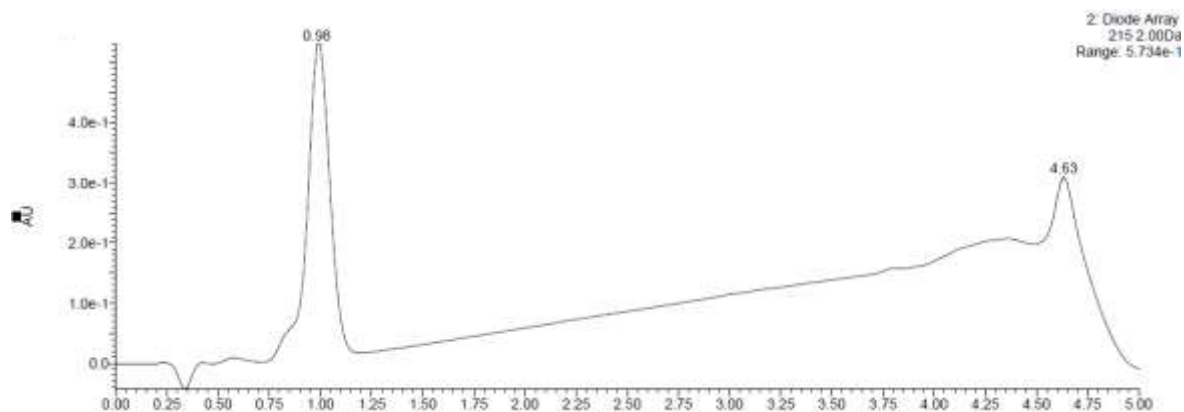

### Trimer 4

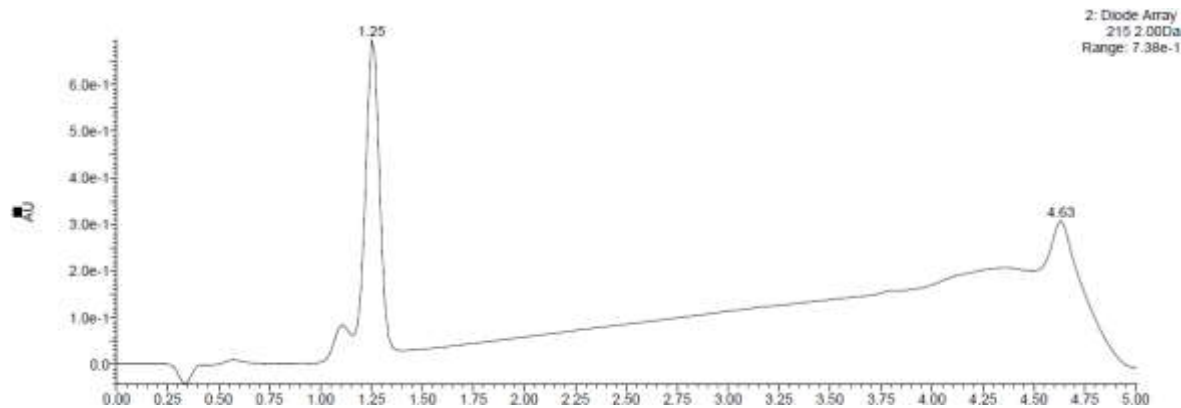

Shoulder and main peak of the same mass.



### Trimer 5

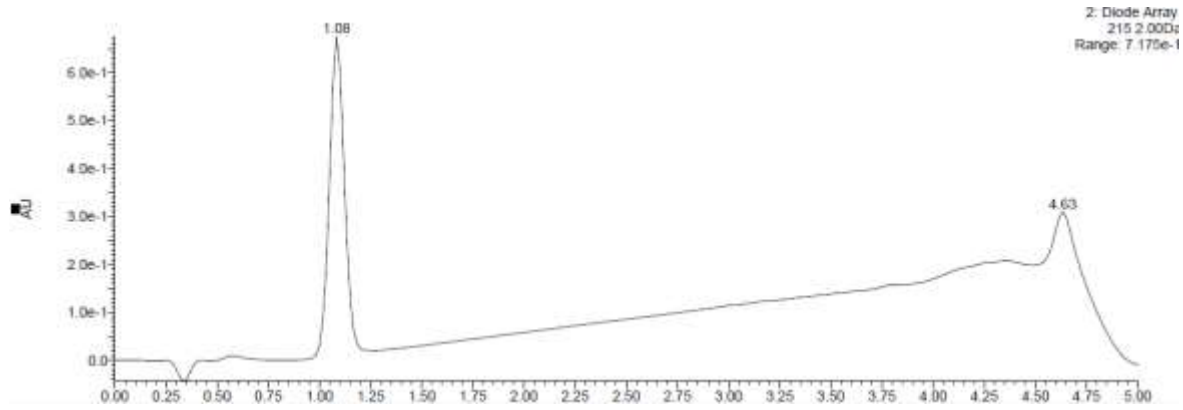

### Hexamer 6

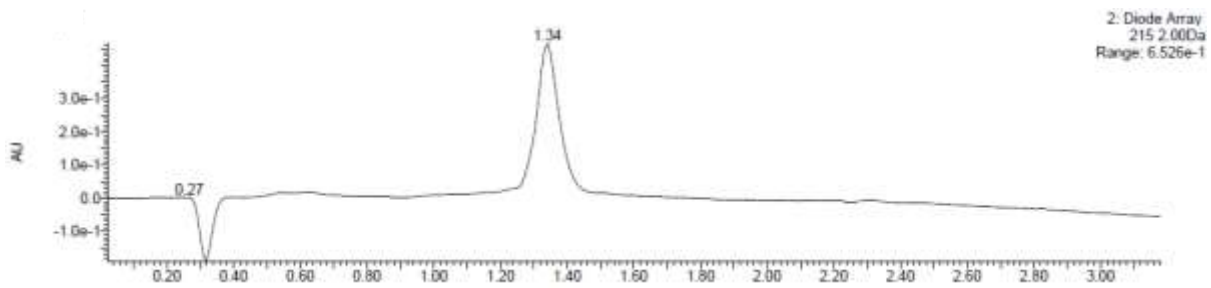

### Hexamer 7

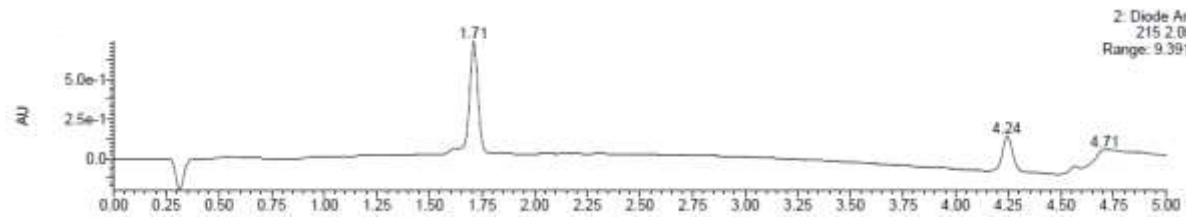

### Hexamer 8

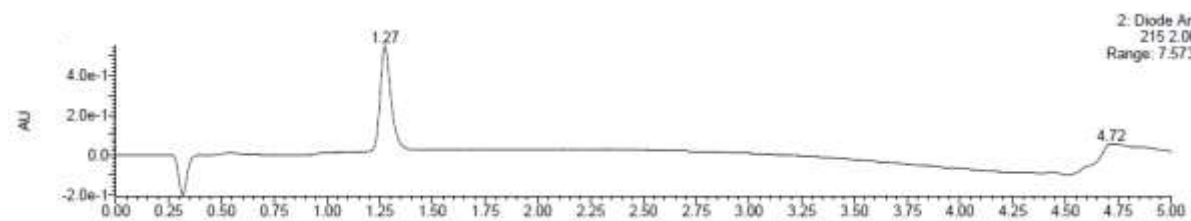

### Hexamer 9

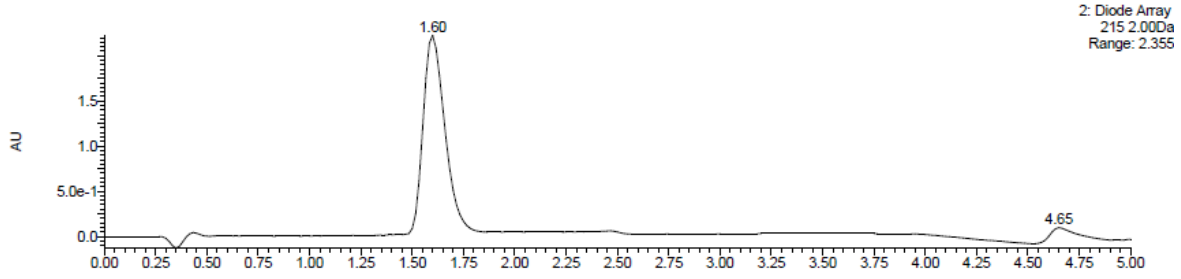

### Nonamer 10

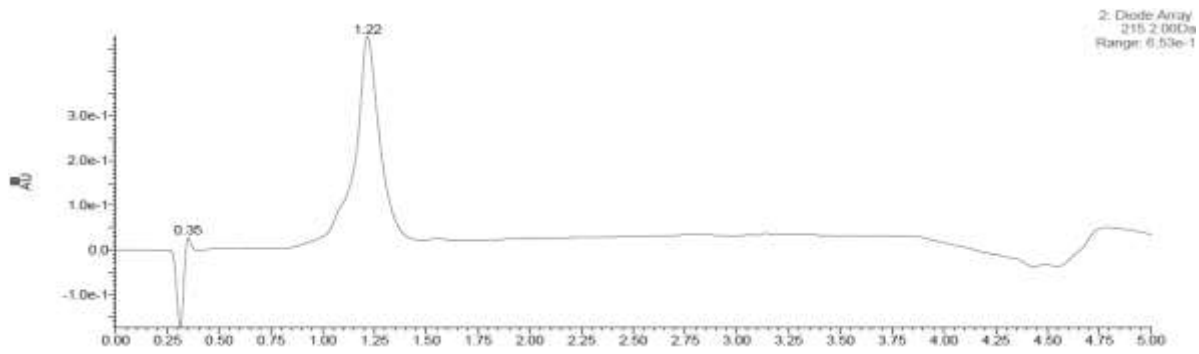

### Nonamer 11

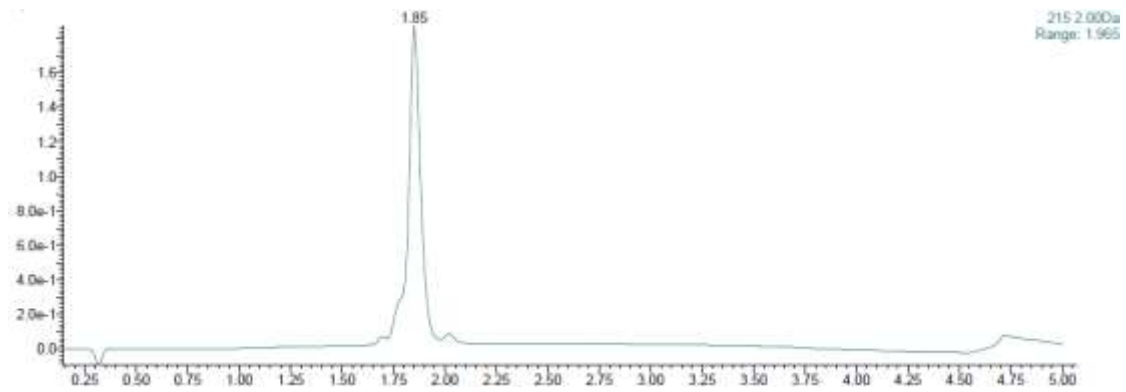

### Nonamer 12

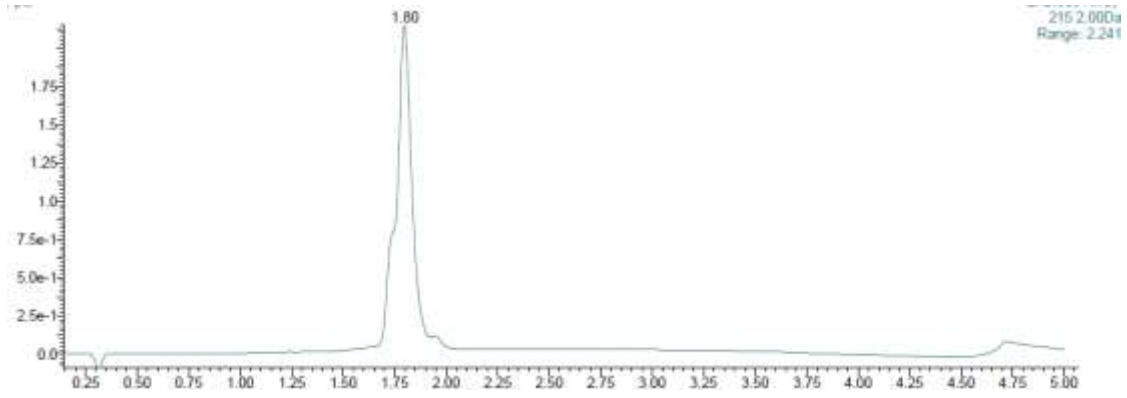

Shoulder and main peak of the same mass.

### Nonamer 13

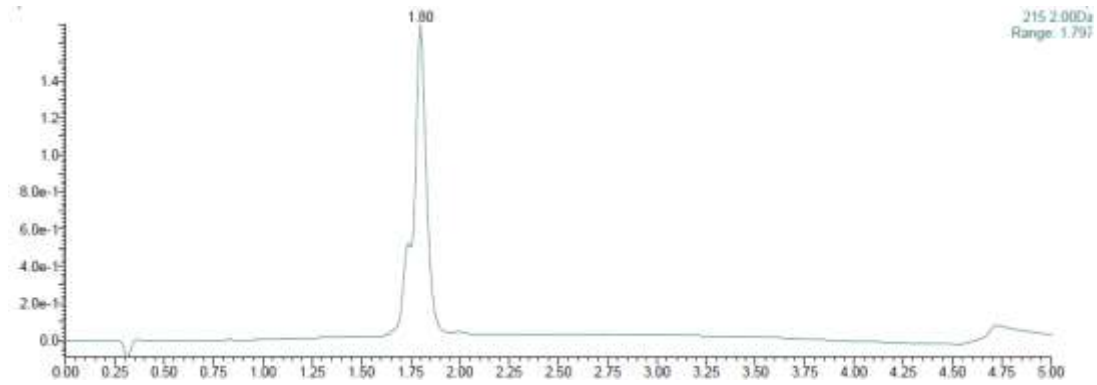

Shoulder and main peak of the same mass.

### Nonamer 14

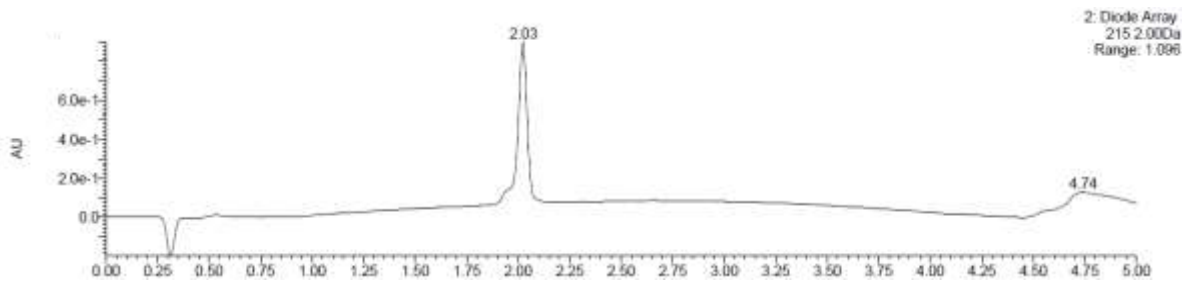

## V. NMR CHARACTERIZATION OF TRIPEPTIDES 2-5, HEXAMER 7 AND NONAMER 14

### V.1 Trimers

#### V.1.1 Trimer 2, one rotamer (>95%)

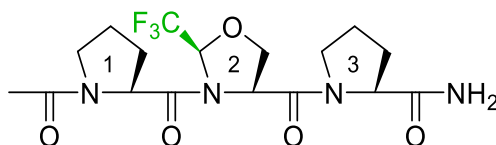

##### V.1.1.1 Characterization of trimer 2 by NMR

#### <sup>1</sup>H NMR (400 MHz, D<sub>2</sub>O, 298 K): Major rotamer (>95%) all-*trans*

|                                       | H <sub>α</sub>                | H <sub>β</sub>          |                         | H <sub>γ</sub> |                               | H <sub>δ</sub>                |
|---------------------------------------|-------------------------------|-------------------------|-------------------------|----------------|-------------------------------|-------------------------------|
| <b>Ac</b>                             | 2.08<br>(s)                   | -                       | -                       | -              | -                             | -                             |
| <b>Pro<sup>1</sup></b>                | 4.59<br>(t, J = 6.7 Hz)       | 1.98                    | 2.30                    | 2.02           | 2.14                          | 3.66<br>(t app., J = 6.2 Hz)  |
| <b>CF<sub>3</sub>ΨPro<sup>2</sup></b> | 5.11<br>(t, J = 8.8 Hz)       | 4.25<br>(t, J = 9.0 Hz) | 4.79<br>(t, J = 8.7 Hz) | -              | -                             | 6.33<br>(q, J = 5.2 Hz)       |
| <b>Pro<sup>3</sup></b>                | 4.40<br>(dd, J = 8.5, 5.8 Hz) | 1.94                    | 2.32                    | 2.04           | 3.58<br>(tt, J = 9.9, 6.8 Hz) | 3.85<br>(tt, J = 9.9, 6.7 Hz) |

#### <sup>13</sup>C NMR (100.5 MHz, D<sub>2</sub>O, 298 K): Major rotamer (>95%) all-*trans*

|                                       | C <sub>α</sub> | C <sub>β</sub>           | C <sub>γ</sub> | C <sub>δ</sub>           | CF <sub>3</sub> | C=O |
|---------------------------------------|----------------|--------------------------|----------------|--------------------------|-----------------|-----|
| <b>Ac</b>                             | 20.9           | -                        | -              | -                        | -               | -   |
| <b>Pro<sup>1</sup></b>                | 58.5           | 29.4-29.6 <sup>[a]</sup> | 24.7           | 48.5                     | -               | -   |
| <b>CF<sub>3</sub>ΨPro<sup>2</sup></b> | 57.7           | 69.2                     | -              | 84.6<br>(q, J = 35.2 Hz) | [b]             | [c] |
| <b>Pro<sup>3</sup></b>                | 60.6           | 29.4-29.6 <sup>[a]</sup> | 24.6           | 47.6                     | -               | -   |

<sup>[a]</sup>: The two C<sub>β</sub> chemical shifts (29.4 and 29.6 ppm) cannot be assigned to a specific Pro residue.

<sup>[b]</sup>: Not observed.

<sup>[c]</sup>: The following carbonyl chemical shifts (167.6, 172.6, 174.6 and 176.6 ppm) were not assigned.

#### <sup>19</sup>F NMR (376.2 MHz, D<sub>2</sub>O, 298 K): (Major rotamer (> 95%) all-*trans*) δ -77.54 (d, J = 4.90 Hz, CF<sub>3</sub>ΨPro<sup>2</sup>CF<sub>3</sub>).

V.1.1.2 Amide bonds assignment of trimer 2

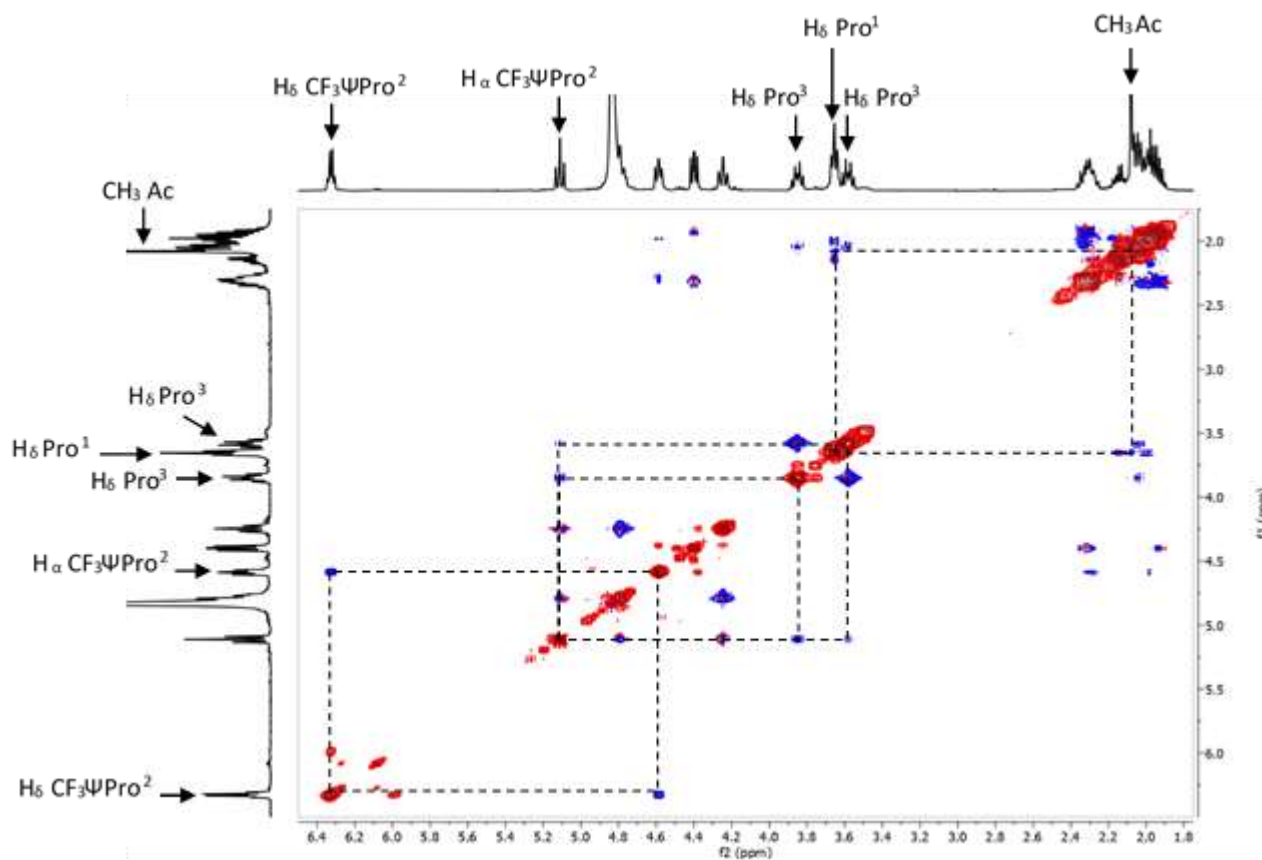

Figure S1: 2D ROESY spectra of trimer 2, 400 MHz, 20 mM in D<sub>2</sub>O, 298 K, 16 scans, 200 ms as mixing time

## V.1.2 Trimer 3, four rotamers (65/15/13/7)

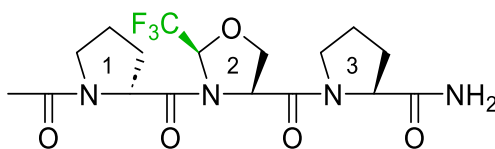

### V.1.2.1 Characterization of trimer 3 by NMR

#### $^1\text{H}$ NMR (400 MHz, $\text{D}_2\text{O}$ , 298 K): Major rotamer (65%) *trans-cis-trans*

|                                       | $\text{H}_\alpha$         | $\text{H}_\beta$          | $\text{H}_\gamma$         | $\text{H}_\delta$         |
|---------------------------------------|---------------------------|---------------------------|---------------------------|---------------------------|
| <b>Ac</b>                             | 2.09<br>(s)               | -                         | -                         | -                         |
| <b>Pro<sup>1</sup></b>                | 4.25                      | 1.96                      | 2.19                      | 1.97 2.13                 |
| <b>CF<sub>3</sub>ΨPro<sup>2</sup></b> | 5.53<br>(t, $J = 8.2$ Hz) | 4.41<br>(t, $J = 8.7$ Hz) | 4.97<br>(t, $J = 8.3$ Hz) | 6.08<br>(q, $J = 5.4$ Hz) |
| <b>Pro<sup>3</sup></b>                | 4.45                      | 1.91                      | 2.35                      | 2.03 3.50 3.79            |

#### $^{13}\text{C}$ NMR (100.5 MHz, $\text{D}_2\text{O}$ , 298 K): Major rotamer (65%) *trans-cis-trans*

|                                       | $\text{C}_\alpha$ | $\text{C}_\beta$ | $\text{C}_\gamma$        | $\text{C}_\delta$          | $\text{CF}_3$ | $\text{C=O}$ |
|---------------------------------------|-------------------|------------------|--------------------------|----------------------------|---------------|--------------|
| <b>Ac</b>                             | 20.9              | -                | -                        | -                          | -             |              |
| <b>Pro<sup>1</sup></b>                | 58.3              | 29.8             | 24.6-24.9 <sup>[a]</sup> | 48.6                       | -             |              |
| <b>CF<sub>3</sub>ΨPro<sup>2</sup></b> | 58.3              | 71.0             | -                        | 84.5<br>(q, $J = 35.7$ Hz) | [b]           | [c]          |
| <b>Pro<sup>3</sup></b>                | 60.7              | 29.3             | 24.6-24.9 <sup>[a]</sup> | 47.3                       | -             |              |

<sup>[a]</sup>: The two  $\text{C}_\gamma$  chemical shifts (24.6 and 24.9 ppm) cannot be assigned to a specific Pro residue.

<sup>[b]</sup>: Not observed.

<sup>[c]</sup>: The following carbonyl chemical shifts (167.4, 172.7, 175.1 and 176.4 ppm) were not assigned.

#### $^{19}\text{F}$ NMR (376.2 MHz, $\text{D}_2\text{O}$ , 298 K): (Major rotamer (65%) *trans-cis-trans*) $\delta$ -77.81 (d, $J = 5.5$ Hz, $\text{CF}_3\Psi\text{Pro}^2\text{CF}_3$ ).

V.1.2.2 Amide bonds assignment of trimer 3

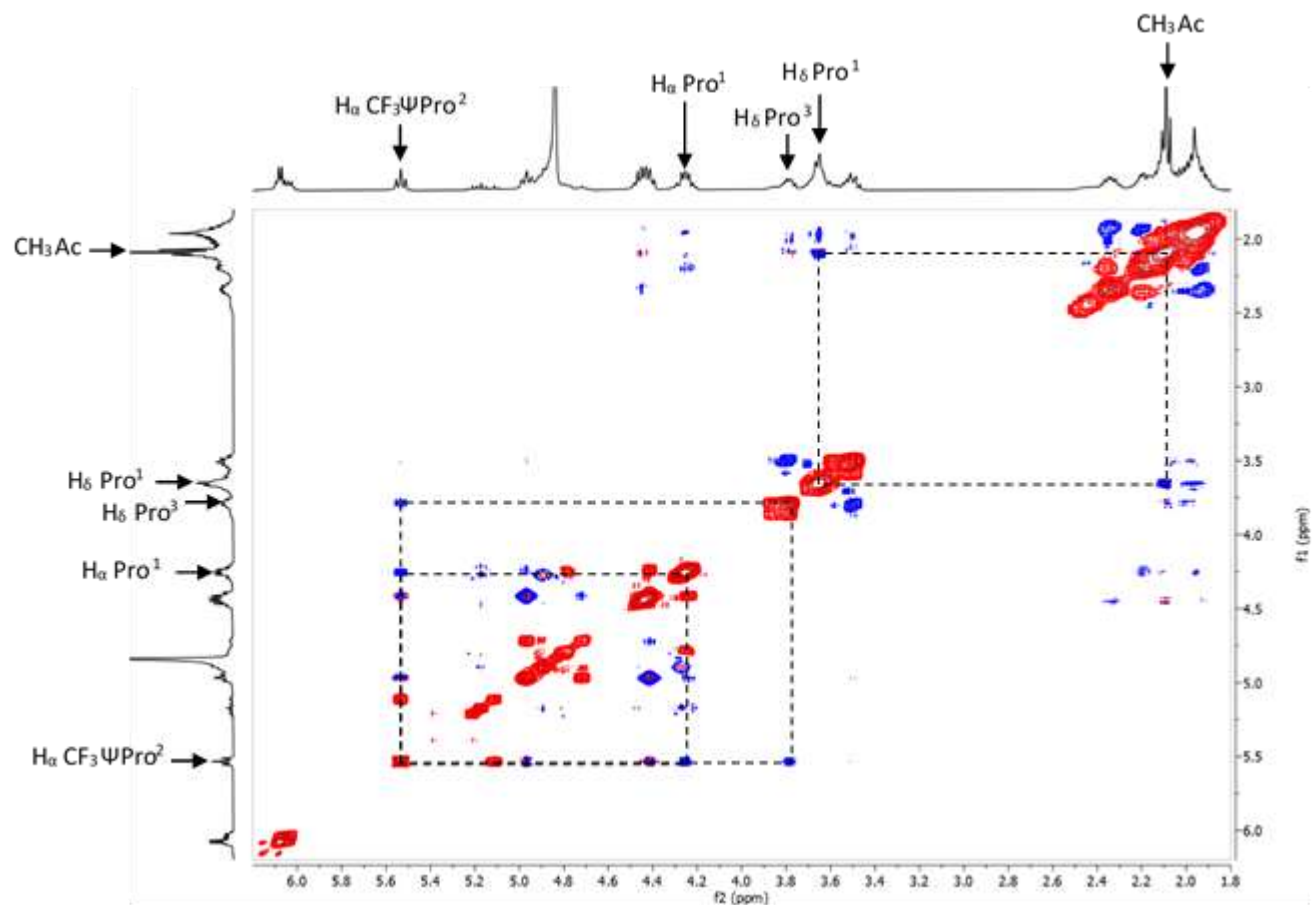

Figure S2: 2D ROESY spectra of trimer 3, 400 MHz, 20 mM in D<sub>2</sub>O, 298 K, 16 scans, 200 ms as mixing time

### V.1.3 Trimer 4, three rotamers (70/22/8)

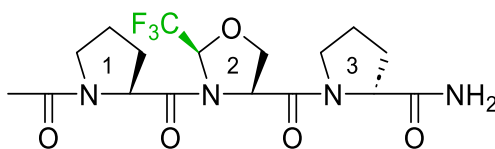

#### V.1.3.1 Characterization of trimer 4 by NMR

##### <sup>1</sup>H NMR (400 MHz, D<sub>2</sub>O, 298 K): Major rotamer (70%) all-*trans*

|                                       | H <sub>α</sub>          | H <sub>β</sub>          |                         | H <sub>γ</sub> |      | H <sub>δ</sub>          |
|---------------------------------------|-------------------------|-------------------------|-------------------------|----------------|------|-------------------------|
| <b>Ac</b>                             | 2.08<br>(s)             | -                       | -                       | -              | -    | -                       |
| <b>Pro<sup>1</sup></b>                | 4.59<br>(t, J = 6.6 Hz) | 1.98                    | 2.29                    | 2.00           | 2.13 | 3.65                    |
| <b>CF<sub>3</sub>ΨPro<sup>2</sup></b> | 5.11<br>(t, J = 8.9 Hz) | 4.23<br>(t, J = 8.9 Hz) | 4.78<br>(t, J = 8.9 Hz) | -              | -    | 6.33<br>(q, J = 5.1 Hz) |
| <b>Pro<sup>3</sup></b>                | 4.37                    | 2.03                    | 2.26                    | 2.03           | 3.55 | 3.93                    |

##### <sup>13</sup>C NMR (100.5 MHz, D<sub>2</sub>O, 298 K): Major rotamer (70%) all-*trans*

|                                       | C <sub>α</sub> | C <sub>β</sub> | C <sub>γ</sub> | C <sub>δ</sub>           | CF <sub>3</sub> | C=O |
|---------------------------------------|----------------|----------------|----------------|--------------------------|-----------------|-----|
| <b>Ac</b>                             | 21.8           | -              | -              | -                        | -               | -   |
| <b>Pro<sup>1</sup></b>                | 58.5           | 29.6           | 24.7           | 48.5                     | -               | [b] |
| <b>CF<sub>3</sub>ΨPro<sup>2</sup></b> | 51.1           | 68.9           | -              | 84.6<br>(q, J = 34.8 Hz) | [a]             | [b] |
| <b>Pro<sup>3</sup></b>                | 60.7           | 29.3           | 24.0           | 47.4                     | -               | [b] |

[a]: Not observed.

[b]: The following carbonyl chemical shifts (168.0, 172.6, 174.8 and 176.8 ppm) were not assigned.

<sup>19</sup>F NMR (376.2 MHz, D<sub>2</sub>O, 298 K): (Major rotamer (70%) all-*trans*) δ -77.50 (d, J = 5.1 Hz, CF<sub>3</sub>ΨPro<sup>2</sup>CF<sub>3</sub>).



V.1.3.2 Amide bonds assignment for trimer 4

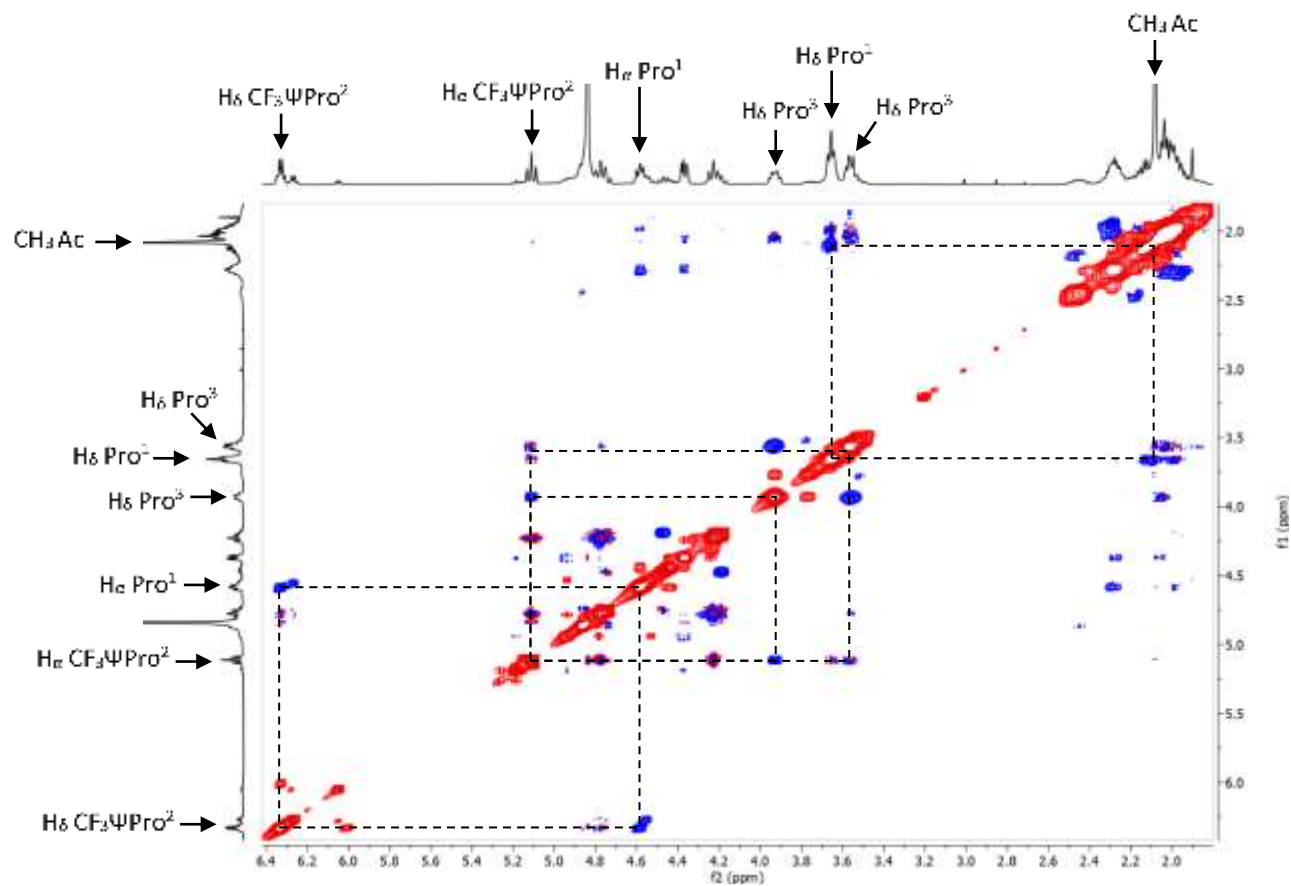

Figure S3: 2D ROESY spectra of trimer 3, 400 MHz, 20 mM in D<sub>2</sub>O, 298 K, 16 scans, 200 ms as mixing time

### V.1.4 Trimer 5, one rotamer (>95%)

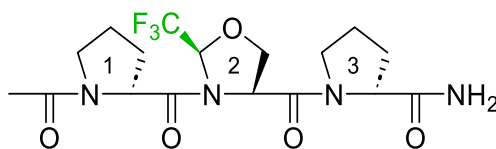

#### V.1.4.1 Protons assignment

<sup>1</sup>H NMR (400 MHz, D<sub>2</sub>O, 298 K): Major rotamer (>95%) *trans-cis-trans*

|                                   | H <sub>α</sub>                | H <sub>β</sub>          | H <sub>γ</sub>          |           | H <sub>δ</sub>          |
|-----------------------------------|-------------------------------|-------------------------|-------------------------|-----------|-------------------------|
| Ac                                | 2.10<br>(s)                   | -                       | -                       | -         | -                       |
| Pro <sup>1</sup>                  | 4.22<br>(t, J = 7.1 Hz)       | 1.88                    | 2.15                    | 1.95 2.10 | 3.65                    |
| CF <sub>3</sub> ΨPro <sup>2</sup> | 5.49<br>(t, J = 8.4 Hz)       | 4.31<br>(t, J = 8.5 Hz) | 4.95<br>(t, J = 8.6 Hz) | -         | 6.06<br>(q, J = 5.4 Hz) |
| Pro <sup>3</sup>                  | 4.41<br>(dd, J = 8.7, 4.8 Hz) | 1.97                    | 2.31                    | 2.05      | 3.51 3.80               |

<sup>13</sup>C NMR (100.5 MHz, D<sub>2</sub>O, 298 K): Major rotamer (>95%) *trans-cis-trans*

|                                   | C <sub>α</sub> | C <sub>β</sub> | C <sub>γ</sub> | C <sub>δ</sub>           | CF <sub>3</sub> | C=O |
|-----------------------------------|----------------|----------------|----------------|--------------------------|-----------------|-----|
| Ac                                | 20.9           | -              | -              | -                        | -               | -   |
| Pro <sup>1</sup>                  | 58.7           | 29.9           | 24.7           | 48.6                     | -               | [b] |
| CF <sub>3</sub> ΨPro <sup>2</sup> | 58.5           | 70.8           | -              | 84.6<br>(q, J = 35.4 Hz) | [a]             | [b] |
| Pro <sup>3</sup>                  | 60.6           | 29.3           | 24.4           | 47.2                     | -               | [b] |

[a]: Not observed.

[b]: The following carbonyl chemical shifts (167.2, 172.6, 175.1 and 176.6 ppm) were not assigned.

<sup>19</sup>F NMR (376.2 MHz, D<sub>2</sub>O, 298 K): (Major rotamer (>95%) *trans-cis-trans*) δ -77.65 (d, J = 5.5 Hz, CF<sub>3</sub>ΨPro<sup>2</sup> CF<sub>3</sub>).

V.1.4.2 Amide bonds assignment

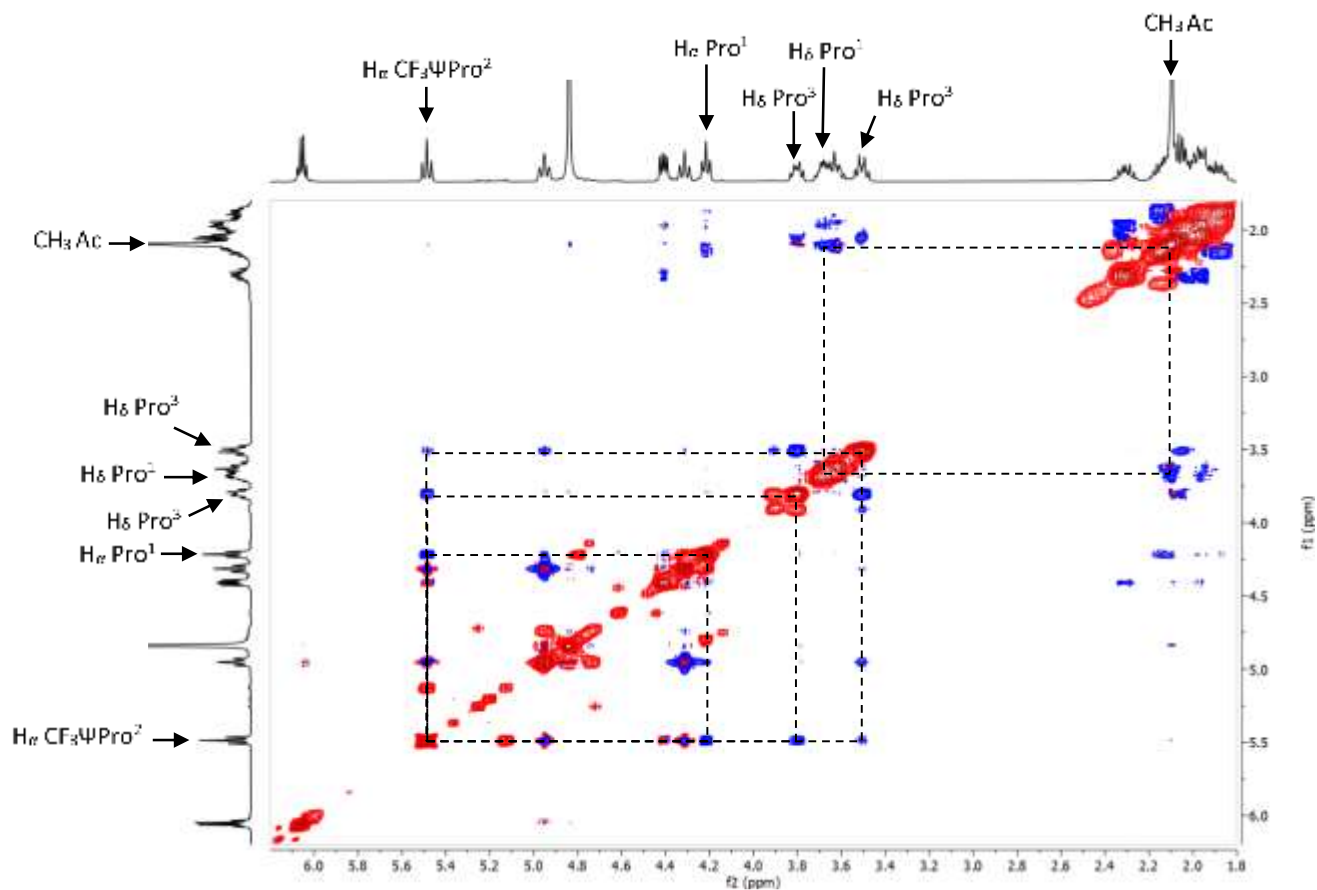

Figure S4: 2D ROESY spectra of trimer 5, 400 MHz, 20 mM in D<sub>2</sub>O, 298 K, 16 scans, 200 ms as mixing time

## V.2 Hexamers

### V.2.1 Hexamer 7, one rotamer (>95%)

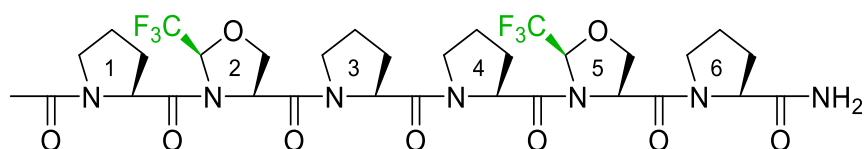

#### V.2.1.1 Protons assignment

##### <sup>1</sup>H NMR (400 MHz, D<sub>2</sub>O, 298K): Major rotamer (> 95%) all-*trans*

|                                   | H <sub>α</sub>                | H <sub>β</sub> | H <sub>γ</sub> | H <sub>δ</sub>      |
|-----------------------------------|-------------------------------|----------------|----------------|---------------------|
| Ac                                | 2.08<br>(s)                   | -              | -              | -                   |
| Pro <sup>1</sup>                  | 4.58<br>(t, J = 6.7 Hz)       | 1.98           | 2.29           | 2.03 2.15 3.65      |
| CF <sub>3</sub> ΨPro <sup>2</sup> | 5.09<br>(dt, J = 8.8, 3.9 Hz) | 4.21           | 4.78           | - 6.32              |
| Pro <sup>3</sup>                  | 4.72                          | 1.79           | 2.34           | 2.03 3.53 3.87      |
| Pro <sup>4</sup>                  | 4.64<br>(t, J = 7.1 Hz)       | 1.96           | 2.30           | 2.03 2.15 3.65 3.82 |
| CF <sub>3</sub> ΨPro <sup>5</sup> | 5.09<br>(dt, J = 8.8, 3.9 Hz) | 4.21           | 4.78           | - 6.34              |
| Pro <sup>6</sup>                  | 4.39<br>(dd, J = 8.5, 5.7 Hz) | 1.94           | 2.32           | 2.02 3.58 3.84      |

##### <sup>13</sup>C NMR (100.5 MHz, D<sub>2</sub>O, 298 K): Major rotamer (> 95%) all-*trans*

|                                                  | C <sub>α</sub> | C <sub>β</sub> | C <sub>γ</sub>           | C <sub>δ</sub>           | CF <sub>3</sub>            | C=O            |
|--------------------------------------------------|----------------|----------------|--------------------------|--------------------------|----------------------------|----------------|
| Ac                                               | 20.9           | -              | -                        | -                        | -                          | -              |
| Pro <sup>1</sup>                                 | 58.5           | 29.6           | 24.6-25.0 <sup>[b]</sup> | 48.3                     | -                          | -              |
| CF <sub>3</sub> ΨPro <sup>2</sup> <sup>[a]</sup> | 57.7           | 69.1           | -                        | 84.6                     | 122.5<br>(q, J = 286.5 Hz) | -              |
| Pro <sup>3</sup>                                 | 58.7           | 27.6           | 24.6-25.0 <sup>[b]</sup> | 47.5-47.6 <sup>[c]</sup> | -                          | <sup>[d]</sup> |
| Pro <sup>4</sup>                                 | 58.9           | 29.1           | 24.6-25.0 <sup>[b]</sup> | 47.5-47.6 <sup>[c]</sup> | -                          | -              |
| CF <sub>3</sub> ΨPro <sup>5</sup> <sup>[a]</sup> | 57.7           | 69.1           | -                        | 84.6                     | 122.5<br>(q, J = 286.5 Hz) | -              |
| Pro <sup>6</sup>                                 | 60.6           | 29.4           | 24.6-25.0 <sup>[b]</sup> | 47.5-47.6 <sup>[c]</sup> | -                          | -              |

<sup>[a]</sup>: The two CF<sub>3</sub>ΨPro could not be distinguished.

<sup>[b]</sup>: The four C<sub>γ</sub> chemical shifts (2 x 24.6, 24.7 and 25.0 ppm) cannot be assigned to a specific Pro residue.

<sup>[c]</sup>: The three C<sub>δ</sub> chemical shifts (2 x 47.5 and 47.6 ppm) cannot be assigned to a specific Pro residue.

<sup>[d]</sup>: The following carbonyl chemical shifts (167.1, 167.6, 171.3, 172.6, 174.1, 174.7, 176.6) were not assigned.

**<sup>19</sup>F NMR (376.2 MHz, D<sub>2</sub>O, 298 K):** (Major rotamer (> 95%) all-trans)  $\delta$  -77.53 (d,  $J = 4.2$  Hz, CF<sub>3</sub>ΨPro<sup>[a]</sup> CF<sub>3</sub>), -77.62 (d,  $J = 4.2$  Hz, CF<sub>3</sub>ΨPro<sup>[a]</sup> CF<sub>3</sub>).

[a]: The two CF<sub>3</sub> chemical shift cannot be assigned to a specific CF<sub>3</sub>ΨPro residue as the CF<sub>3</sub>ΨPro cannot be differentiated.

### V.2.1.2 Amide bonds assignment

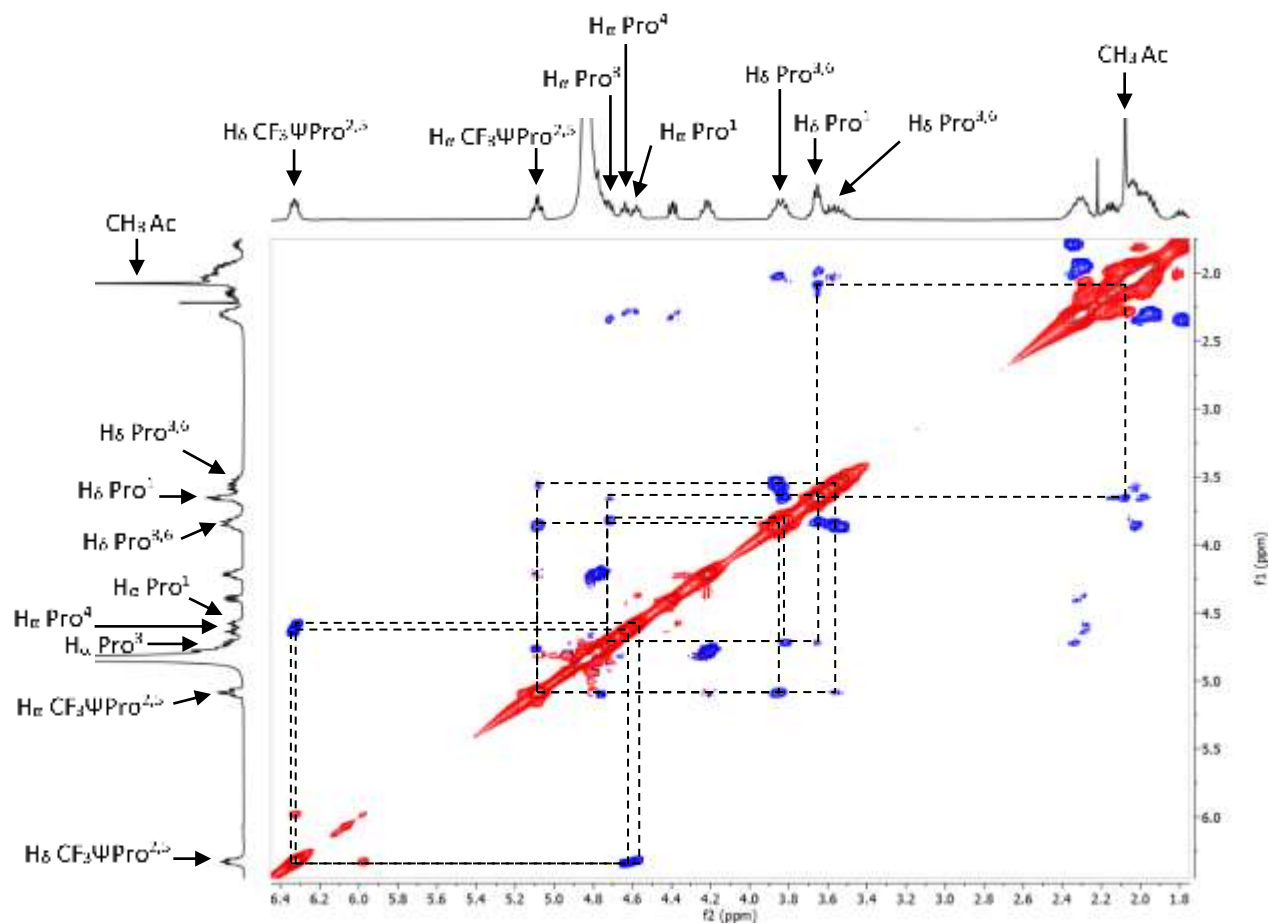

Figure S5: 2D ROESY spectra of hexamer 7, 400 MHz, 20 mM in D<sub>2</sub>O, 298 K, 16 scans, 200 ms as mixing time

## V.3 Nonamers

### V.3.1 Nonamer 14, one rotamer (>95%)

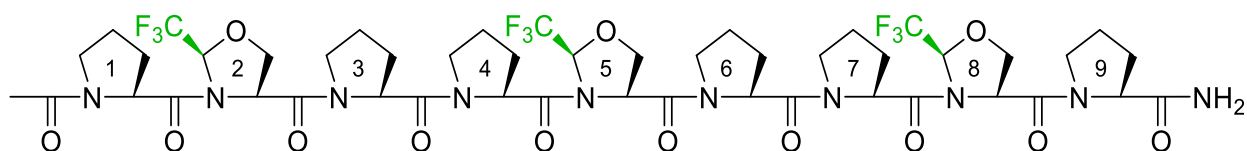

#### V.3.1.1 Protons assignment

#### <sup>1</sup>H NMR (400 MHz, D<sub>2</sub>O, 298K): Major rotamer (> 95%) all-*trans*

|                                           | H <sub>α</sub>                       | H <sub>β</sub> |      | H <sub>γ</sub> |      | H <sub>δ</sub> |
|-------------------------------------------|--------------------------------------|----------------|------|----------------|------|----------------|
| <b>Ac</b>                                 | 2.08<br>(s)                          | -              | -    | -              | -    | -              |
| <b>Pro<sup>1</sup></b>                    | 4.58<br>(t, <i>J</i> = 6.8 Hz)       | 1.98           | 2.30 | 2.14           |      | 3.65           |
| <b>CF<sub>3</sub>ΨPro<sup>2</sup> [a]</b> | 5.08                                 | 4.21           | 4.78 | -              |      | 6.33           |
| <b>Pro<sup>3</sup> [b]</b>                | 4.71                                 | 1.80           | 2.34 | 2.02           |      | 3.53 3.86      |
| <b>Pro<sup>4</sup> [c]</b>                | 4.63<br>(t app., <i>J</i> = 6.9 Hz)  | 1.96           | 2.30 | 2.07           | 2.17 | 3.65 3.82      |
| <b>CF<sub>3</sub>ΨPro<sup>5</sup> [a]</b> | 5.08                                 | 4.21           | 4.78 | -              |      | 6.33           |
| <b>Pro<sup>6</sup> [b]</b>                | 4.71                                 | 1.80           | 2.34 | 2.02           |      | 3.53 3.86      |
| <b>Pro<sup>7</sup> [c]</b>                | 4.63<br>(t app., <i>J</i> = 6.9 Hz)  | 1.96           | 2.30 | 2.07           | 2.17 | 3.65 3.82      |
| <b>CF<sub>3</sub>ΨPro<sup>8</sup> [a]</b> | 5.08                                 | 4.21           | 4.78 | -              |      | 6.33           |
| <b>Pro<sup>9</sup></b>                    | 4.39<br>(dd, <i>J</i> = 8.5, 5.6 Hz) | 1.95           | 2.32 | 2.05           |      | 3.58 3.84      |

[a]: The three CF<sub>3</sub>ΨPro could not be distinguished.

[b]: The two prolines, Pro<sup>3</sup> and Pro<sup>6</sup> could not be distinguished.

[c]: The two proline, Pro<sup>4</sup> and Pro<sup>7</sup> could not be distinguished.

**<sup>13</sup>C NMR (100.5 MHz, D<sub>2</sub>O, 298 K): Major rotamer (> 95%) all-trans**

|                                                  | C <sub>α</sub> | C <sub>β</sub> | C <sub>γ</sub>           | C <sub>δ</sub>           | CF <sub>3</sub>            | C=O            |
|--------------------------------------------------|----------------|----------------|--------------------------|--------------------------|----------------------------|----------------|
| Ac                                               | 20.9           | -              | -                        | -                        | -                          | -              |
| Pro <sup>1</sup>                                 | 58.5           | 29.6           | 24.6-25.0 <sup>[d]</sup> | 48.5                     | -                          | -              |
| CF <sub>3</sub> ΨPro <sup>2</sup> <sup>[a]</sup> | 57.7           | 69.1           | -                        | 84.6<br>(q, J = 34.8 Hz) | 123.9<br>(q, J = 286.8 Hz) | -              |
| Pro <sup>3</sup> <sup>[b]</sup>                  | 58.7           | 27.6           | 24.6-25.0 <sup>[d]</sup> | 47.5                     | -                          | -              |
| Pro <sup>4</sup> <sup>[c]</sup>                  | 58.9           | 29.1           | 24.6-25.0 <sup>[d]</sup> | 47.6                     | -                          | -              |
| CF <sub>3</sub> ΨPro <sup>5</sup> <sup>[a]</sup> | 57.7           | 69.1           | -                        | 84.6<br>(q, J = 34.8 Hz) | 123.9<br>(q, J = 286.8 Hz) | <sup>[e]</sup> |
| Pro <sup>6</sup> <sup>[b]</sup>                  | 58.7           | 27.6           | 24.6-25.0 <sup>[d]</sup> | 47.5                     | -                          | -              |
| Pro <sup>7</sup> <sup>[c]</sup>                  | 58.9           | 29.1           | 24.6-25.0 <sup>[d]</sup> | 47.6                     | -                          | -              |
| CF <sub>3</sub> ΨPro <sup>8</sup> <sup>[a]</sup> | 57.7           | 69.1           | -                        | 84.6<br>(q, J = 34.8 Hz) | 123.9<br>(q, J = 286.8 Hz) | -              |
| Pro <sup>9</sup>                                 | 60.6           | 29.4           | 24.6-25.0 <sup>[d]</sup> | 47.5                     | -                          | -              |

<sup>[a]</sup>: The three CF<sub>3</sub>ΨPro could not be distinguished.

<sup>[b]</sup>: The two prolines, Pro<sup>3</sup> and Pro<sup>6</sup> could not be distinguished.

<sup>[c]</sup>: The two proline, Pro<sup>4</sup> and Pro<sup>7</sup> could not be distinguished

<sup>[d]</sup>: The C<sub>γ</sub> chemical shifts (24.6, 24.7 and 25.0 ppm) cannot be assigned to a specific Pro residue. Moreover, due to resonance overlap only 3 peaks were found.

<sup>[e]</sup>: The following carbonyl chemical shifts (2 x 167.1, 167.6, 2 x 171.3, 172.6, 2 x 174.1, 174.7, 176.6) were not assigned. Due to resonance overlap, only 6 carbonyl peaks were found.

**<sup>19</sup>F NMR (376.2 MHz, D<sub>2</sub>O, 298 K): (Major rotamer (> 95%) all-trans) δ -76.36 (d, J = 4.7 Hz, CF<sub>3</sub>ΨPro<sup>[a]</sup> CF<sub>3</sub>), -76.44 (m, 2 x CF<sub>3</sub>ΨPro<sup>[a]</sup> CF<sub>3</sub>).**

<sup>[a]</sup>: The three CF<sub>3</sub> chemical shift cannot be assigned to a specific CF<sub>3</sub>ΨPro residue as the CF<sub>3</sub>ΨPro cannot be differentiated.

### V.3.1.2 Amide bonds assignment

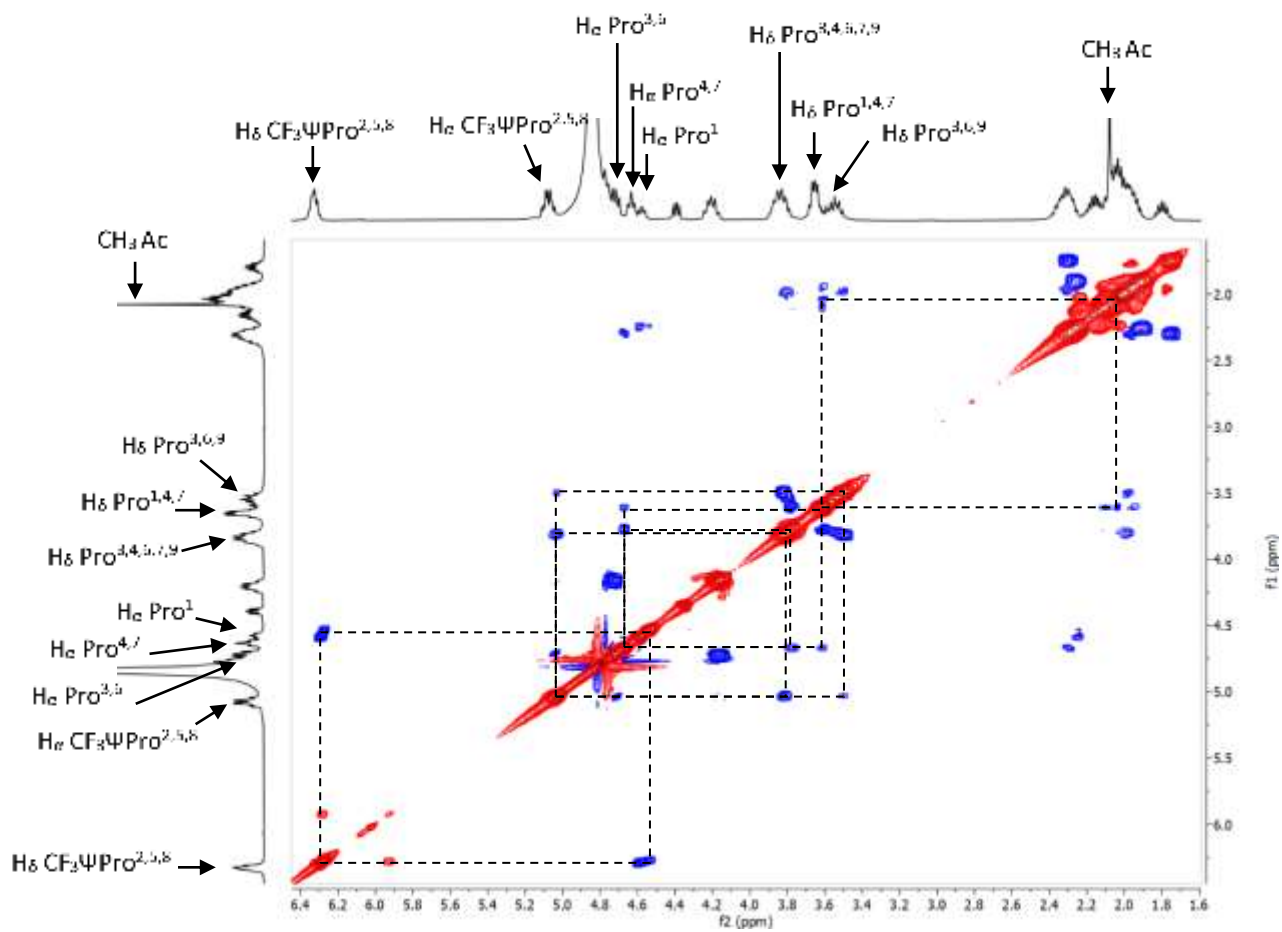

Figure S6: 2D ROESY spectra of nonamer **14**, 400 MHz, 20 mM in D<sub>2</sub>O, 298 K, 16 scans, 200 ms as mixing time



## VI. SYNTHESIS AND CD STUDIES OF RESIDUE CHROMOPHORES

### VI.1 Synthesis of Ac-L-Pro-NHMe

#### VI.1.1 Ac-L-Pro-OBn

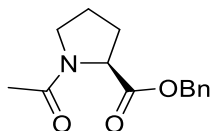

H-L-Pro-OBn.HCl (500 mg, 2.07 mmol, 1 eq.) was dissolved in dry DCM (7 mL) under argon atmosphere. Pyridine (500  $\mu$ L, 6.20 mmol, 3 eq.) was added and then AcCl (440  $\mu$ L, 6.20 mmol, 3 eq.) was added dropwise. The reaction mixture was left stirred at r.t overnight. The reaction mixture was then diluted with DCM (10 mL) and washed with HCl (1M, 4 mL). The resulting aqueous phase was extracted with DCM (2 x 10 mL). The organic phases were gathered, washed with brine (15 mL), dried over Na<sub>2</sub>SO<sub>4</sub>, filtered and evaporated. The crude was purified by chromatography on silica gel with cyclohexane/ethyl acetate (80/20) to give the pure compound Ac-L-Pro-OBn (453 mg, 88%) as a 22/78 mixture of Ac *cis/trans* rotational isomers in CDCl<sub>3</sub> at 298 K.

Oil; <sup>1</sup>H NMR (400 MHz, CDCl<sub>3</sub>, 298 K) (22/78 mixture of rotational isomers) (*trans rotational isomer*)  $\delta$  1.48-2.31 (m, 4 H, H <sub>$\beta$</sub> -Pro and H <sub>$\gamma$</sub> -Pro), 2.10 (s, 3 H, CH<sub>3</sub> Ac), 3.35-3.69 (m, 2 H, H <sub>$\delta$</sub> -Pro), 4.54 (dd, *J* = 8.6, 3.4 Hz, 1 H, H <sub>$\alpha$</sub>  Pro), 5.12-5.20 (m, 2 H, CH<sub>2</sub> OBn), 7.28-7.40 (m, 5 H, OBn arom.); (*cis rotational isomer*)  $\delta$  1.48-2.31 (m, 4 H, H <sub>$\beta$</sub> -Pro and H <sub>$\gamma$</sub> -Pro), 1.92 (s, 3 H, CH<sub>3</sub> Ac), 3.35-3.69 (m, 2 H, H <sub>$\delta$</sub> -Pro), 4.39 (dd, *J* = 8.6, 2.9 Hz, 1 H, H <sub>$\alpha$</sub>  Pro), 5.12-5.20 (m, 2 H, CH<sub>2</sub> OBn), 7.28-7.40 (m, 5 H, OBn arom.); <sup>13</sup>C NMR (100.5 MHz, CDCl<sub>3</sub>, 298 K) (22/78 mixture of rotational isomers) (*trans rotational isomer*)  $\delta$  22.4 (CH<sub>3</sub>, CH<sub>3</sub> Ac), 24.9 (CH<sub>2</sub>, C <sub>$\gamma$</sub> ), 29.5 (CH<sub>2</sub>, C <sub>$\beta$</sub> ), 47.9 (CH<sub>2</sub>, C <sub>$\delta$</sub> ), 58.7 (CH, C <sub>$\alpha$</sub> ), 66.9 (CH<sub>2</sub>, CH<sub>2</sub> OBn), 128.1 (2 x CH, OBn arom.), 128.2 (CH, OBn arom.), 128.6 (2 x CH, OBn arom.), 135.9 (C, OBn arom.), 169.6 (C, C=O), 172.3 (C, C=O); (*cis rotational isomer*)  $\delta$  22.3 (CH<sub>3</sub>, CH<sub>3</sub> Ac), 22.9 (CH<sub>2</sub>, C <sub>$\gamma$</sub> ), 31.6 (CH<sub>2</sub>, C <sub>$\beta$</sub> ), 46.4 (CH<sub>2</sub>, C <sub>$\delta$</sub> ), 60.4 (CH, C <sub>$\alpha$</sub> ), 67.4 (CH<sub>2</sub>, CH<sub>2</sub> OBn), 128.4 (2 x CH, OBn arom.), 128.7 (CH, OBn arom.), 128.8 (2 x CH, OBn arom.), 135.3 (C, OBn arom.), 168.9 (C, C=O), 172.1 (C, C=O).

In accordance with the literature.<sup>2</sup>

#### VI.1.2 Ac-L-Pro-OH

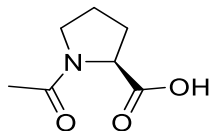

Ac-L-Pro-OBn (450 mg, 1.82 mmol, 1 eq.) was dissolved in MeOH (12 mL) and Pd/C, 10% (45 mg, 10% in weight) was added. The reaction medium was stirred under H<sub>2</sub> atmosphere overnight at r.t. The reaction mixture was filtered through celite and then evaporated. The crude was directly engaged in the next step.

Colorless oil. Product commercially available (CAS: 68-95-1).

### VI.1.3 Ac-L-Pro-NHMe

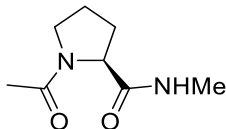

Ac-L-Pro-OH (330 mg, 2.10 mmol, 1 eq.) was dissolved in DMF (12 mL). MeNH<sub>2</sub>.HCl (241 mg, 3.57 mmol, 1.7 eq.), HOBt (321 mg, 2.38 mmol, 1.1 eq.), NaHCO<sub>3</sub> (600 mg, 7.14 mmol, 3.4 eq.), EDCI (483 mg, 2.52 mmol, 1.2 eq.) were successively added. The reaction medium was stirred overnight at r.t. Water (25 mL) and EtOAc (25 mL) were added and the layers were separated. The aqueous layer was extracted with EtOAc (7 x 25 mL) and the organic layer was washed with brine, dried over MgSO<sub>4</sub>, filtered and evaporated. The crude was purified by chromatography on silica gel with dichloromethane/methanol from (100/0) to (90/10) to give the desired compound (120 mg, 39% over two steps) as a 10/90 mixture of Ac *cis/trans* rotational isomers in CDCl<sub>3</sub> at 298 K.

White solid; <sup>1</sup>H NMR (400 MHz, CDCl<sub>3</sub>, 298 K) (10/90 mixture of rotational isomers) (*trans* rotational isomer)  $\delta$  1.82 (m, 1 H, H <sub>$\beta$</sub> -Pro-Ha), 2.02 (m, 1 H, H <sub>$\gamma$</sub> -Pro-Ha), 2.11 (s, 3 H, CH<sub>3</sub> Ac), 2.14 (m, 1 H, H <sub>$\gamma$</sub> -Pro-Hb), 2.49 (m, 1 H, H <sub>$\beta$</sub> -Pro-Hb), 2.76 (d, *J* = 4.9 Hz, 3 H, CH<sub>3</sub> NHMe), 3.41 (dt, *J* = 9.8, 7.0 Hz, 1 H, H <sub>$\delta$</sub> -Pro-Ha), 3.54 (dt, *J* = 10.1, 2.3 Hz, 1 H, H <sub>$\delta$</sub> -Pro-Hb), 4.56 (d, *J* = 8.0 Hz, 1 H, H <sub>$\alpha$</sub> -Pro), 7.14 (m, 1 H, NH); (*cis* rotational isomer)  $\delta$  1.73-2.27 (m, 4 H, H <sub>$\beta$</sub> -Pro and H <sub>$\gamma$</sub> -Pro), 2.04 (s, 3 H, CH<sub>3</sub> Ac), 2.79 (d, *J* = 4.9 Hz, 3 H, CH<sub>3</sub> NHMe), 3.60 (m, 2 H, H <sub>$\delta$</sub> -Pro), 4.30 (dd, *J* = 7.7, 3.7 Hz, 1 H, H <sub>$\alpha$</sub> -Pro), 6.1 (m, 1 H, NH); <sup>13</sup>C NMR (100.5 MHz, CDCl<sub>3</sub>, 298 K) (10/90 mixture of rotational isomers) (*trans* rotational isomer)  $\delta$  22.7 (CH<sub>3</sub>, CH<sub>3</sub> Ac), 25.2 (CH<sub>2</sub>, C <sub>$\gamma$</sub> ), 26.3 (CH<sub>3</sub>, CH<sub>3</sub> NHMe), 27.2 (CH<sub>2</sub>, C <sub>$\beta$</sub> ), 48.5 (CH<sub>2</sub>, C <sub>$\delta$</sub> ), 59.6 (CH, C <sub>$\alpha$</sub> ), 171.3 (C, C=O), 171.8 (C, C=O); (*minor conformer: too low to be observed*).

Product commercially available (CAS: 19701-85-0).

## VI.2 Synthesis of Ac-CF<sub>3</sub>ΨPro-OBn

### VI.2.1 Ac-CF<sub>3</sub>ΨPro-OBn

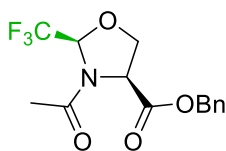

H-CF<sub>3</sub>ΨPro-OBn (416 mg, 1.51 mmol, 1 eq.) was dissolved in acetic anhydride (1.4 mL, 15.1 mmol, 10 eq.) and iodine (38 mg, 0.15 mmol, 0.1 eq.) was added. The reaction mixture was stirred overnight at r.t. Then, DCM (15 mL) was added and the organic layer was washed with NaHSO<sub>3</sub> (1 M). The aqueous layer was extracted with DCM (3 x 10 mL). The resulting organic layers were gathered, washed with brine, dried with Na<sub>2</sub>SO<sub>4</sub>, filtered and evaporated. The crude was purified by chromatography on silica gel with cyclohexane/ethyl acetate (60/40) to give the pure compound Ac-CF<sub>3</sub>ΨPro-OBn (413 mg, 86%) as a 50/50 mixture of Ac *cis/trans* rotational isomers in CDCl<sub>3</sub> at 298 K.

Oil; **Rf** 0.48 (65/35 cyclohexane/ethyl acetate); [ $\alpha$ ]<sub>D</sub><sup>20</sup> -70.0° (c 1.0, CHCl<sub>3</sub>); **IR** (neat) 2961, 1753, 1682, 1388, 1286, 1176, 1148, 1120, 953, 847, 754, 695 cm<sup>-1</sup>; <sup>1</sup>H NMR (400 MHz, CDCl<sub>3</sub>, 298 K) (50/50 mixture of rotational isomers impossible to distinguish)  $\delta$  2.14 (s, 3 H, CH<sub>3</sub> Ac), 2.22 (s, 3 H, CH<sub>3</sub> Ac), 4.30-4.56 (m, 4 H, 2 x H <sub>$\beta$</sub> -CF<sub>3</sub>ΨPro), 4.68 (s,

1 H, H $\alpha$ -CF<sub>3</sub>ΨPro), 5.03 (s, 1 H, H $\alpha$ -CF<sub>3</sub>ΨPro), 5.21 (s, 4 H, 2 x CH<sub>2</sub> OBn), 5.50 (s, 1 H, H $\delta$ -CF<sub>3</sub>ΨPro), 5.92 (s, 1 H, H $\delta$ -CF<sub>3</sub>ΨPro), 7.31-7.40 (m, 10 H, 2 x OBn arom.); <sup>13</sup>C NMR (100.5 MHz, CDCl<sub>3</sub>, 298 K) (50/50 mixture of rotational isomers impossible to distinguish)  $\delta$  22.4 (CH<sub>3</sub>, CH<sub>3</sub> Ac), 31.1 (CH<sub>3</sub>, CH<sub>3</sub> Ac), 57.0 (CH, C $\alpha$ ), 58.5 (CH, C $\alpha$ ), 67.7 (CH<sub>2</sub>, CH<sub>2</sub> OBn), 68.3 (CH<sub>2</sub>, CH<sub>2</sub> OBn), 69.6 (CH<sub>2</sub>, C $\beta$ ), 70.6 (CH<sub>2</sub>, C $\beta$ ), 84.3 (m, CH, C $\delta$ ), 85.4 (m, CH, C $\delta$ ), 122.8 (q, *J* = 286.6 Hz, 2 C, 2 x CF<sub>3</sub>), 128.1-129.8 (10 x CH, OBn arom.), 134.6 (2 x C, OBn arom.), 135.1 (2 x C, OBn arom.), 168.4 (2 x C, C=O), 169.7 (2 x C, C=O); <sup>19</sup>F NMR (376.2 MHz, CDCl<sub>3</sub>, 298 K) (50/50 mixture of rotational isomers impossible to distinguish)  $\delta$  -78.57 (s, CF<sub>3</sub>), -78.81 (s, CF<sub>3</sub>); HRMS (ESI-TOF) *m/z* [M + Na]<sup>+</sup> calculated for C<sub>14</sub>H<sub>14</sub>F<sub>3</sub>NO<sub>4</sub>Na: 340.0773, found: 340.0761.

### VI.2.2 Ac-CF<sub>3</sub>ΨPro-OH

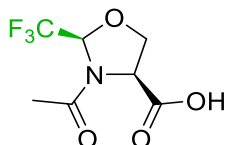

Ac-CF<sub>3</sub>ΨPro-OBn (400 mg, 1.26 mmol, 1 eq.) was dissolved in MeOH (6 mL) and Pd/C, 10% (40 mg, 10% in weight) was added. The reaction mixture was stirred under H<sub>2</sub> (1 bar) at r.t. overnight. The reaction mixture was filtered through Celite and the solvent was evaporated. The crude was directly engaged in the next step.

Colorless oil.

### VI.2.3 Ac-CF<sub>3</sub>ΨPro-NHMe

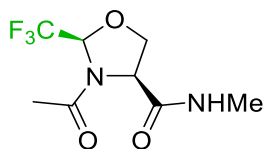

Ac-CF<sub>3</sub>ΨPro-OH (250 mg, 1.11 mmol, 1 eq.) was dissolved in DMF (6 mL) and MeNH<sub>2</sub>.HCl (128 mg, 1.89 mmol, 1.7 eq.), HOBt (170 mg, 1.25 mmol, 1.1 eq.), EDCI (255 mg, 1.33 mmol, 1.2 eq.), NaHCO<sub>3</sub> (317 mg, 3.77 mmol, 3.4 eq.) were successively added. The reaction mixture was stirred 22 hours at r.t. Water (20 mL) and EtOAc (20 mL) were added and the layers were separated. The aqueous phase was extracted with EtOAc (6 x 20 mL) and the organic layer was washed with brine, dried over Na<sub>2</sub>SO<sub>4</sub>, filtered and evaporated. The crude was purified by chromatography on silica gel from Cyclohexane/AcOEt (50/50) to (0/100) to give the desired compound (185 mg, 62% over two steps) as a 24/76 mixture of Ac *cis/trans* rotational isomers in CDCl<sub>3</sub> at 298 K.

Colorless oil; <sup>1</sup>H NMR (400 MHz, CDCl<sub>3</sub>, 298 K): (24/76 mixture of rotational isomers) (*trans* rotational isomer)  $\delta$  2.25 (m, 3 H, CH<sub>3</sub> Ac), 2.82 (m, 3 H, CH<sub>3</sub> NHMe), 4.21-4.95 (m, 3 H, H $\alpha$ -CF<sub>3</sub>ΨPro, H $\beta$ -CF<sub>3</sub>ΨPro), 5.52 (m, 1 H, H $\delta$ -CF<sub>3</sub>ΨPro), 6.70 (m, 1 H, NH); (*cis* rotational isomer: too low to be observed); <sup>13</sup>C NMR (100.5 MHz, CDCl<sub>3</sub>, 298 K): (24/76 mixture of rotational isomers) (*trans* rotational isomer)  $\delta$  22.6 (CH<sub>3</sub>, CH<sub>3</sub> Ac), 26.5 (CH<sub>3</sub>, CH<sub>3</sub> NHMe), 57.7 (CH<sub>2</sub>, C $\alpha$ ), 69.0 (CH<sub>2</sub>, C $\beta$ ), 85.6 (q, *J* = 35.1 Hz, CH, C $\delta$ ), 122.5 (q, *J* = 287.8 Hz, C, CF<sub>3</sub>), 168.5 (C, C=O), 171.4 (C, C=O); (*cis* rotational isomer: too low to be observed); <sup>19</sup>F NMR (376.2 MHz, CDCl<sub>3</sub>, 298 K) (24/76 mixture of rotational isomers) (*trans* rotational isomer)  $\delta$  -79.23 (s, CF<sub>3</sub>); (*cis* rotational isomer)  $\delta$  -78.08 (s, CF<sub>3</sub>).

In accordance with the literature.<sup>1</sup>

### VI.3 Circular dichroism characterization

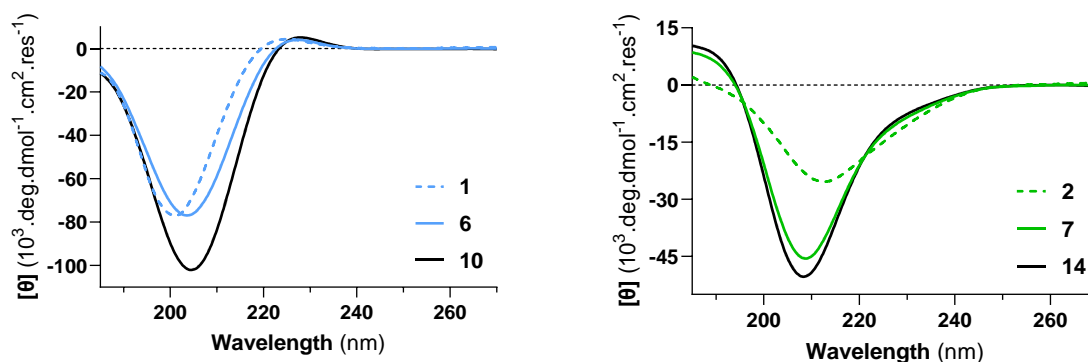

Figure S7: Comparison of CD spectra of non-fluorinated peptides **1**, **6** and **10** and fluorinated peptides **2**, **7** and **14** chromophores Ac-L-Pro-NHMe and Ac-CF<sub>3</sub>ΨPro-NHMe, 100 μM in PBS 20 mM, 4°C

Trimer **1** shows a CD spectrum similar to that of hexamer **6**, with a slight blue shift of the negative band around 207 nm. The fluorinated trimer **2** exhibits a red shifted and less intense negative band compared to the hexamer **8** and nonamer **14**. The absence of the hallmark positive band around 228 nm for the trimer **2** is also noted, as observed with the fluorinated hexamer **7** and nonamer **14**.

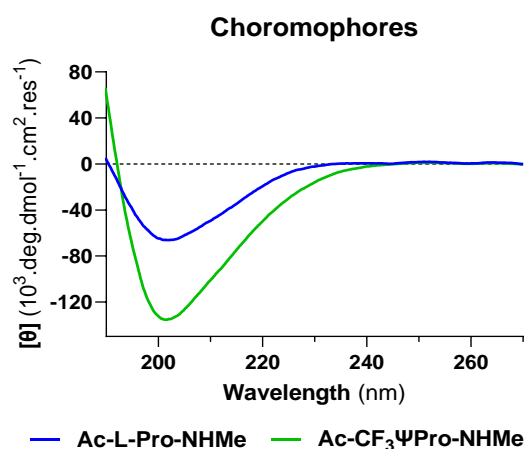

Figure S8: CD spectra of chromophores Ac-L-Pro-NHMe and Ac-CF<sub>3</sub>ΨPro-NHMe, 100 μM in PBS 20 mM, 4°C

The direct proximity of the chiral environment (C<sub>δ</sub>-CF<sub>3</sub>) on Ac-CF<sub>3</sub>ΨPro-NHMe CD chromophore (amide bond) significantly impacts the magnitude of the CD signal which appears more negative compared to that of the Ac-L-Pro-NHMe.

## VII. SUPPLEMENTARY CD EXPERIMENT

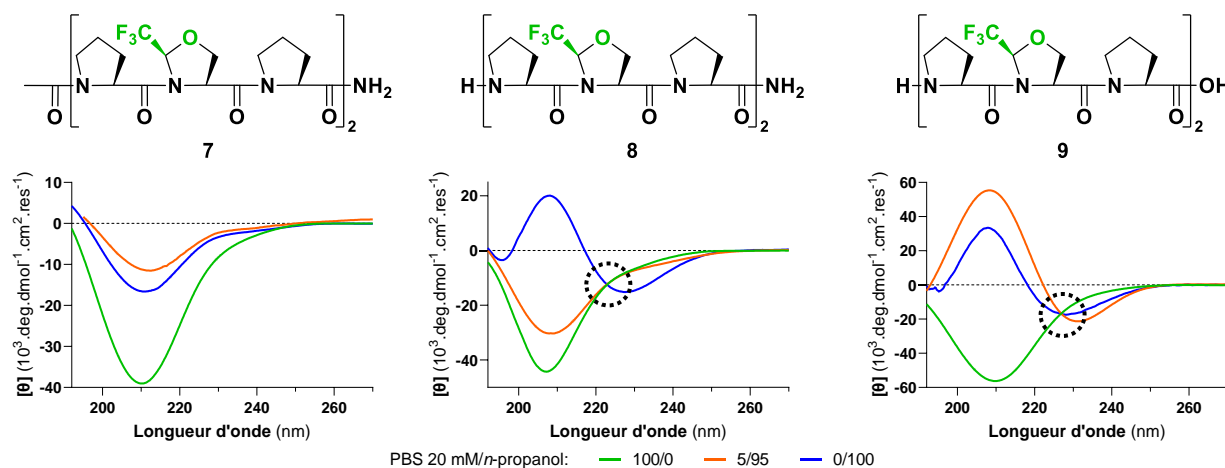

Figure S9: CD spectra of hexamers **7-9**, 100 μM, 4°C with different ratio of the solvent PBS 20 mM/n-propanol: green line (100/0), orange line (5/95) and blue line (0/100). Circle highlight the isosbestic point

Figure S9 repeats Figure 1.C presented in the article, with the addition of the CD spectrum in the solvent PBS 20 mM/n-propanol (5/95), revealing the presence of an isosbestic point for oligomers **8** and **9**. These two isosbestic points indicate that only two conformations are engaged in the transition process and then strongly support the PPII folding of our fluorinated oligomers in aqueous media.

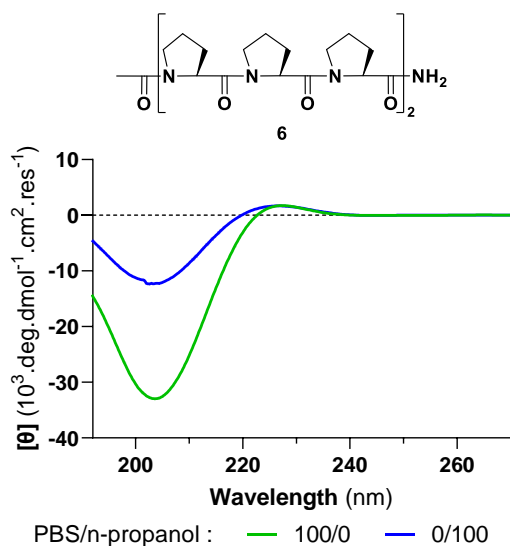

Figure S10: CD spectra of hexamer **6**, 100 μM, 4°C with different ratio of the solvent PBS 20 mM/n-propanol: green line (100/0) and blue line (0/100).

The non-fluorinated hexamer **6** does not promote a conversion of PPII to PPI folding in PBS 20 mM/n-propanol (0/100), but only a decrease of the signal ellipticity is observed.

## VIII. X-RAY STRUCTURE OF NONAMER **14**

---

### VIII.1 Crystallographic data collection, structure determination and refinement

Suitable crystals for single crystal X-ray diffraction (SCXRD) analysis were obtained for the compound **14** by slow evaporation of methanol solvent. Methanol was not dried but contained residual water and was exposed to air during vapor diffusion. X-ray diffraction data were measured at low temperature (123 K) using a RIGAKU *XtaLabPro* diffractometer consisting of a Mo microfocus sealed-tube *MM003* generator coupled to a Max-Flux® double-bounce confocal multilayer optic and a HPAD *PILATUS3R 200K* detector. The data were processed using *CrysAlisPro*<sup>3</sup> with *SCALE3 ABSPACK* scaling algorithm implemented for the empirical absorption correction using spherical harmonics, combined with a numerical absorption correction based on Gaussian integration over a multifaceted rectangular platelet model. The weak diffraction exhibited little signal beyond atomic resolution, yet sufficient to obtain a structure solution by intrinsic phasing methods with complete connectivity using *SHELX-T*. The working data set was truncated at a resolution limit of  $\sin\theta/\lambda=0.515$  ( $d_{\min}=0.97\text{\AA}$ ) in order to attempt to anisotropic refinement of the model with complete connectivity using full-matrix least-squares methods on  $F^2$  using *SHELX-L*.<sup>4,5</sup> In the absence of any anomalous signal, the model was refined as a two-component inversion twin, with the non-significant BASF fraction value being disregarded, since the absolute configuration is determined by the *L*-proline constituents. Three badly-fitting reflections, which were shaded by the beamstop, were omitted, and the displacement factors were severely restrained to compensate for the low ratio of observables-to-parameters. To keep them in check, the RIGU (strict sd 0.001) and ISOR (sd 0.03 except for three non-hydrogen atoms sd 0.001) commands were applied throughout the entire model. All carbon-bound and nitrogen-bound hydrogen atoms were geometrically positioned and refined using riding models with constrained distances set 0.98 Å ( $R_{CH_3}$ ), 0.99 Å ( $R_{2CH_2}$ ), 1.00 Å ( $R_{3CH}$ ), 0.88 Å (N-H), and  $U_{iso}(H)$  parameters with assigned values of either  $1.2U_{eq}$  or  $1.5U_{eq}$  ( $R_{CH_3}$  only) of the attached atom. Crystal data, data collection and structure refinement details are summarized in Table S4.

Despite the poor refinement statistics, the model was able to evidence two different puckering features for Pro<sup>1</sup> and Pro<sup>3</sup>, whose occupancy parameter ratio were adjusted to 0.60/0.40 and 0.65/0.35, respectively (Fig. S11 and S12). The mean of helical pitch (Table S5) and dihedral angles values (Table S6) were calculated. Additionally, three vicinal water molecules were observed in the model together with hydrogen bonding patterns (Table S7, Figure S13 and S14). The O-H distances were restrained to a value of 0.84 Å. Finally, electrostatic potentials mapped on Hirshfeld surface were studied (Figure S15).

CCDC 2352908 for **14** contains the supplementary crystallographic data for this paper. These data can be obtained free of charge from the Cambridge Crystallographic Data Centre via [www.ccdc.cam.ac.uk/data\\_request/cif](http://www.ccdc.cam.ac.uk/data_request/cif).

|                                            |                                                                                                   |            |
|--------------------------------------------|---------------------------------------------------------------------------------------------------|------------|
| Identification code                        | <b>14</b>                                                                                         |            |
| Empirical formula                          | C <sub>47</sub> H <sub>53</sub> F <sub>3</sub> N <sub>5</sub> O <sub>5</sub> , 3 H <sub>2</sub> O |            |
| Formula weight                             | 1191.04                                                                                           |            |
| Crystal form                               |                                                                                                   |            |
| Crystal system,<br>Space group             | Triclinic,<br>P 1                                                                                 |            |
| Unit cell dimensions                       | a (Å)                                                                                             | 6.7234(16) |
|                                            | b (Å)                                                                                             | 10.105(2)  |
|                                            | c (Å)                                                                                             | 19.638(5)  |
|                                            | α (°)                                                                                             | 91.057(19) |
|                                            | β (°)                                                                                             | 90.07(2)   |
|                                            | γ (°)                                                                                             | 93.418(18) |
| Volume (Å <sup>3</sup> )                   | 1331.6(5)                                                                                         |            |
| Z, Calculated density (Mg/m <sup>3</sup> ) | 1, 1.493                                                                                          |            |
| Absorption coefficient (mm <sup>-1</sup> ) | 0.132                                                                                             |            |
| F(000)                                     | 626                                                                                               |            |
| Crystal size                               | 0.13 x 0.06 x 0.02                                                                                |            |
| Data collection                            |                                                                                                   |            |
| Diffractometer                             | Rigaku XtaLABPro mm003 Pilatus 200K                                                               |            |
| Temperature (K)                            | 123.0 (2)                                                                                         |            |
| Wavelength (Å)                             | 0.71073                                                                                           |            |
| θ range for data collection                | 3.035 to 21.485                                                                                   |            |
| Limiting indices                           | -6 ≤ h ≤ 6, -10 ≤ k ≤ 10, -20 ≤ l ≤ 20                                                            |            |
| Reflections collected / unique             | 10538 / 5817 [R(int) = 0.1186]                                                                    |            |
| Completeness to θ <sub>full</sub> = 21.5°  | 99.2 %                                                                                            |            |

|                                                     |                                    |
|-----------------------------------------------------|------------------------------------|
| Absorption correction                               | Gaussian                           |
| Max. and min. transmission                          | 1.000 and 0.808                    |
| <i>Structure Refinement</i>                         |                                    |
| Refinement method                                   | Full-matrix least-squares on $F^2$ |
| Data / restraints / parameters                      | 5814 / 1240 / 779                  |
| Goodness-of-fit on $F^2$                            | 1.078                              |
| Final R indices [ $I > 2\sigma(I)$ ]                | R1 = 0.1101, wR2 = 0.2404          |
| R indices ( <i>all data</i> )                       | R1 = 0.1488, wR2 = 0.2600          |
| Largest diff. peak and hole ( $e.\text{\AA}^{-3}$ ) | 0.516 and -0.404                   |
| CCDC deposit number                                 | 2352908                            |

Table S4: Crystal data, data collection and structure refinement details for **14**

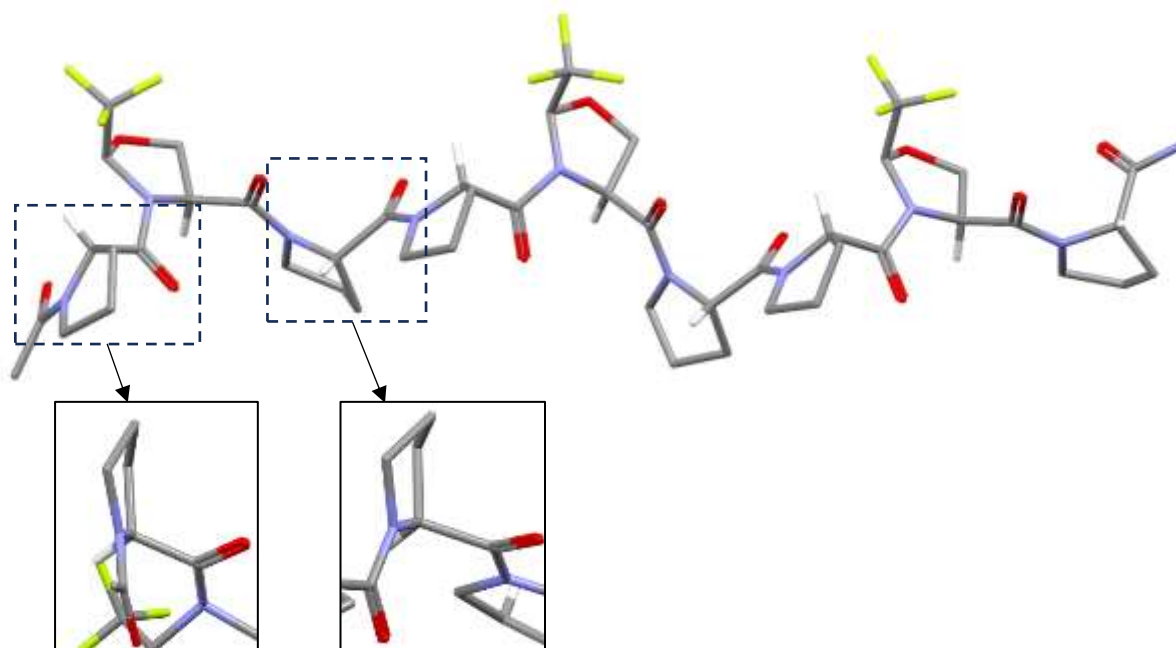

Figure S11: Major X-ray structure of nonamer **14** with Pro<sup>1</sup> (60%) and Pro<sup>3</sup> (65%) in  $C_\gamma$ -endo puckering



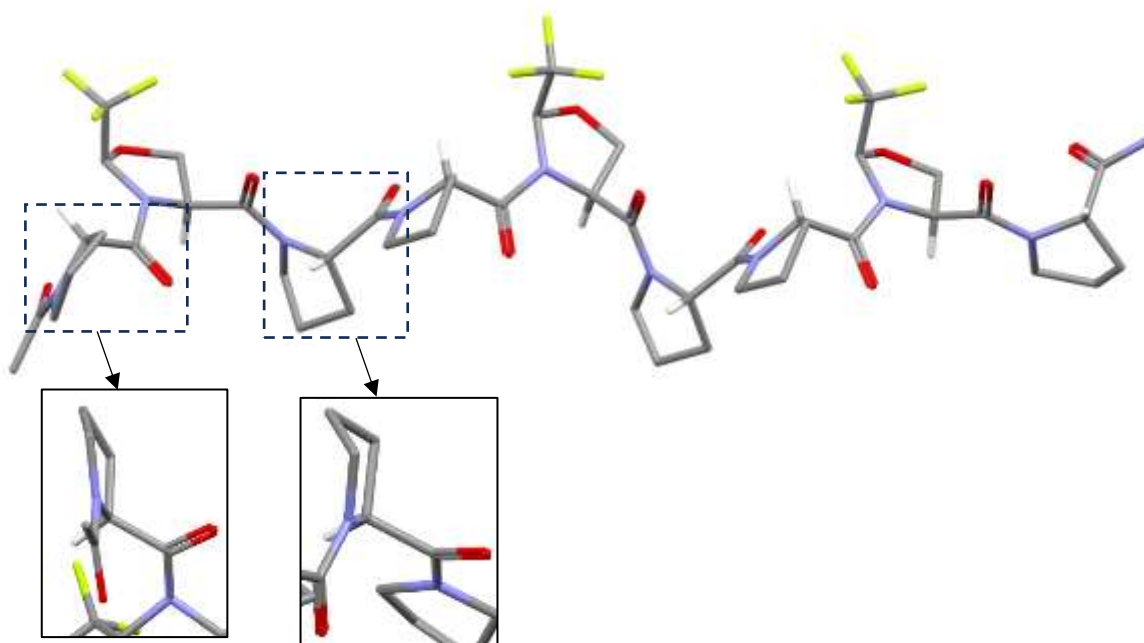

Figure S12: Minor X-ray structure of nonamer **14** with Pro<sup>1</sup> (40%) and Pro<sup>3</sup> (35%) in C<sub>v</sub>-exo puckering

## VIII.2 Helical pitch

### A. Major X-ray structure

| Distance every three residues (Å) | Pro <sup>1</sup> -Pro <sup>4</sup> | CF <sub>3</sub> ΨPro <sup>2</sup> -<br>CF <sub>3</sub> ΨPro <sup>5</sup> | Pro <sup>3</sup> -Pro <sup>6</sup> | Pro <sup>4</sup> -Pro <sup>7</sup> | CF <sub>3</sub> ΨPro <sup>5</sup> -<br>CF <sub>3</sub> ΨPro <sup>8</sup> | Pro <sup>6</sup> -Pro <sup>9</sup> |
|-----------------------------------|------------------------------------|--------------------------------------------------------------------------|------------------------------------|------------------------------------|--------------------------------------------------------------------------|------------------------------------|
| C <sub>α</sub>                    | 8.913                              | 9.894                                                                    | 8.99                               | 8.863                              | 8.473                                                                    | 9.84                               |
| C <sub>β</sub>                    | 8.616                              | 10.809                                                                   | 8.869                              | 8.902                              | 7.835                                                                    | 10.289                             |
| C <sub>γ</sub> or O               | 8.227                              | 11.19                                                                    | 8.154                              | 8.823                              | 7.641                                                                    | 10.844                             |
| C <sub>δ</sub>                    | 8.283                              | 10.578                                                                   | 8.743                              | 8.826                              | 8.052                                                                    | 9.837                              |
| C (carbonyl)                      | 8.553                              | 9.728                                                                    | 9.117                              | 8.927                              | 8.466                                                                    | 9.356                              |
| O (carbonyl)                      | 8.962                              | 9.484                                                                    | 9.018                              | 8.841                              | 8.724                                                                    | 9.15                               |
| Mean (Å)                          | 8.55 ± 0.24                        | 10.18 ± 0.58                                                             | 8.87 ± 0.24                        | 8.90 ± 0.07                        | 8.25 ± 0.34                                                              | 9.60 ± 0.69                        |
| Global mean (Å)                   | <b>9.06 ± 0.62</b>                 |                                                                          |                                    |                                    |                                                                          |                                    |

### B. Minor X-ray structure

| Distance every three residues (Å) | Pro <sup>1</sup> -Pro <sup>4</sup> | CF <sub>3</sub> ΨPro <sup>2</sup> -<br>CF <sub>3</sub> ΨPro <sup>5</sup> | Pro <sup>3</sup> -Pro <sup>6</sup> | Pro <sup>4</sup> -Pro <sup>7</sup> | CF <sub>3</sub> ΨPro <sup>5</sup> -<br>CF <sub>3</sub> ΨPro <sup>8</sup> | Pro <sup>6</sup> -Pro <sup>9</sup> |
|-----------------------------------|------------------------------------|--------------------------------------------------------------------------|------------------------------------|------------------------------------|--------------------------------------------------------------------------|------------------------------------|
| C <sub>α</sub>                    | 8.913                              | 9.894                                                                    | 8.99                               | 8.863                              | 8.473                                                                    | 9.84                               |
| C <sub>β</sub>                    | 8.616                              | 10.809                                                                   | 8.869                              | 8.902                              | 7.835                                                                    | 10.289                             |
| C <sub>γ</sub> or O               | 8.874                              | 11.19                                                                    | 8.868                              | 8.823                              | 7.641                                                                    | 10.844                             |
| C <sub>δ</sub>                    | 8.283                              | 10.578                                                                   | 8.743                              | 8.826                              | 8.052                                                                    | 9.837                              |
| C (carbonyl)                      | 8.553                              | 9.728                                                                    | 9.117                              | 8.927                              | 8.466                                                                    | 9.356                              |
| O (carbonyl)                      | 8.962                              | 9.484                                                                    | 9.018                              | 8.841                              | 8.724                                                                    | 9.15                               |
| Mean (Å)                          | 8.64 ± 0.23                        | 10.18 ± 0.58                                                             | 8.97 ± 0.12                        | 8.90 ± 0.07                        | 8.25 ± 0.34                                                              | 9.60 ± 0.69                        |
| Global mean (Å)                   | <b>9.09 ± 0.60</b>                 |                                                                          |                                    |                                    |                                                                          |                                    |

Table S5: Distance every three residues between the C<sub>α</sub>, C<sub>β</sub>, C<sub>γ</sub> or O, C<sub>δ</sub>, C carbonyl and O carbonyl atoms for the major (A) and minor (B) X-ray structure. The average of all these distances gives the value of the helix pitch. The calculated error corresponds to the standard deviations. Red values correspond to differences between the two X-ray structure

The major and minor X-ray structures give access to very close helix pitch values since only two distances differ between  $C_{\gamma}(\text{Pro}^1) - C_{\gamma}(\text{Pro}^4)$  and  $C_{\gamma}(\text{Pro}^3) - C_{\gamma}(\text{Pro}^6)$  due to the different  $C_{\gamma}$ -*exo* puckering of  $\text{Pro}^1$  and  $\text{Pro}^3$  in these two structures.

### VIII.3 Dihedral angles values

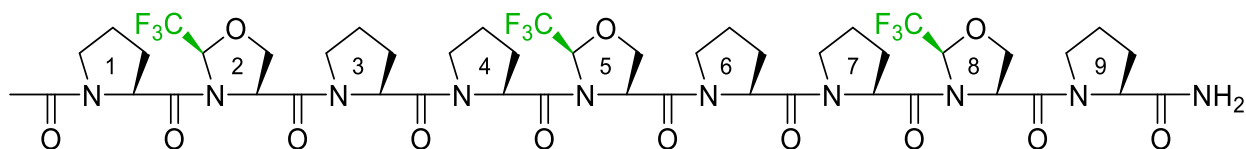

|       | Ac   | Pro <sup>1</sup> | CF <sub>3</sub> ΨPro <sup>2</sup> | Pro <sup>3</sup> | Pro <sup>4</sup> | CF <sub>3</sub> ΨPro <sup>5</sup> | Pro <sup>6</sup> | Pro <sup>7</sup> | CF <sub>3</sub> ΨPro <sup>8</sup> | Pro <sup>9</sup> |
|-------|------|------------------|-----------------------------------|------------------|------------------|-----------------------------------|------------------|------------------|-----------------------------------|------------------|
| φ (°) | -    | -56              | -75                               | -81              | -74              | -79                               | -47              | -69              | -85                               | -82              |
| ψ (°) | -    | +142             | +140                              | +145             | +154             | +137                              | +136             | +132             | +168                              | +174             |
| ω (°) | +176 | -173             | -156                              | +176             | +178             | +175                              | -178             | +179             | +172                              | -                |

Table S6: Dihedral angles table of nonamer **14** X-ray structure. The two X-ray structures obtained have the same  $\phi$ ,  $\psi$  and  $\omega$  dihedral angles, since they differ only in the puckering on prolines 1 and 3.  $\phi$  angles:  $(C_{i-1}-N_i-C_{\alpha i}-C_i)$ ;  $\psi$  angles:  $(N_i-C_{\alpha i}-C_i-N_{i+1})$ ;  $\omega$  angles:  $(C_{\alpha i}-C_i-N_{i+1}-C_{\alpha i+1})$ . Ideal values for PPII helix:  $\phi = -75^\circ$ ,  $\psi = 150^\circ$  and  $\omega = 180^\circ$  or  $-180^\circ$

The introduction of trifluoromethyl-pseudoproline residues caused distortions of certain dihedral angle values which deviate from those reported for an ideal PPII-helix.

## VIII.4 Hydrogen-bonding patterns in nonamer 14

| D-H...A                      | d(D-H)  | d(H...A) | d(D...A)  | <(DHA)  |
|------------------------------|---------|----------|-----------|---------|
| O1W-H1W1...O6                | 0.84(3) | 2.24(5)  | 3.02(2)   | 158(13) |
| O1W-H1W2...O2W <sup>#1</sup> | 0.84(3) | 1.99(5)  | 2.75(2)   | 150(12) |
| O2W-H2W1...O9                | 0.84(3) | 1.93(5)  | 2.75(2)   | 167(20) |
| O2W-H2W2...O3W <sup>#5</sup> | 0.84(3) | 1.96(5)  | 2.78(2)   | 164(19) |
| O3W-H3W1...O8                | 0.84(3) | 2.14(4)  | 2.969(19) | 169(19) |
| O3W-H3W2...O1W <sup>#2</sup> | 0.84(3) | 2.02(6)  | 2.81(2)   | 156(15) |
| N10-H10A...O10 <sup>#2</sup> | 0.88    | 2.55     | 3.42(3)   | 169.9   |
| N10-H10B...O10 <sup>#3</sup> | 0.88    | 2.11     | 2.92(3)   | 152.0   |

Table S7: Water hydrogen bonding pattern for 14 (Å and °). Symmetry transformations used to generate equivalent atoms: #1  $x, y+1, z$ ; #2  $x, y-1, z$ ; #3  $x, y-2, z+1$ ; #5  $x-1, y, z$

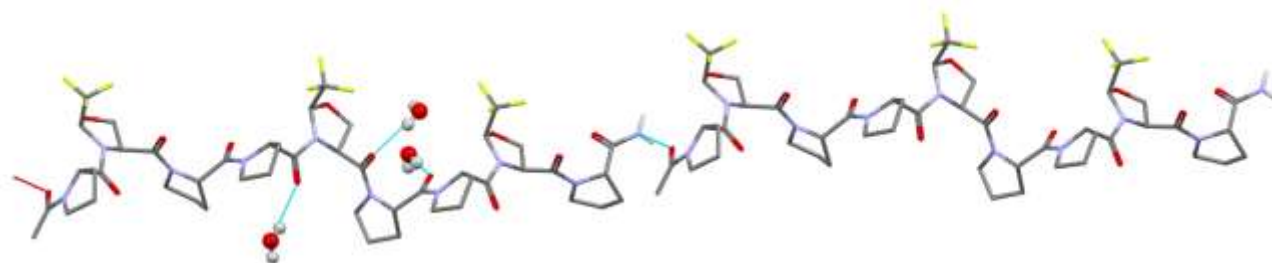

Figure S13: H-bonding patterns (cyan dashed lines) between nonamers **14** (capped sticks style) and water molecules (ball and stick style)

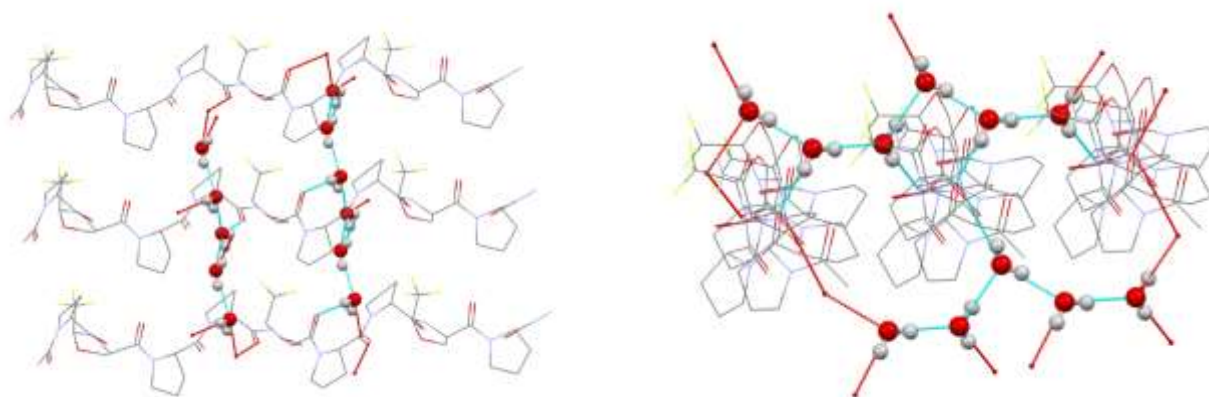

Figure S14: H-bonding patterns between water molecules (ball and stick style) and three molecules of nonamer **14** (wireframe style); A. from a side view B. from a top view

## VIII.5 Electrostatic potentials mapped on Hirshfeld surface of nonamer **14**

**A.**

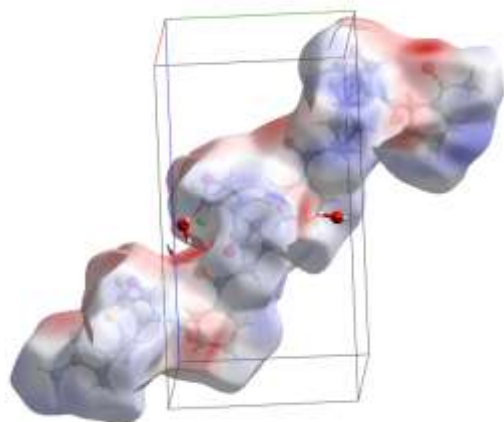

**B.**

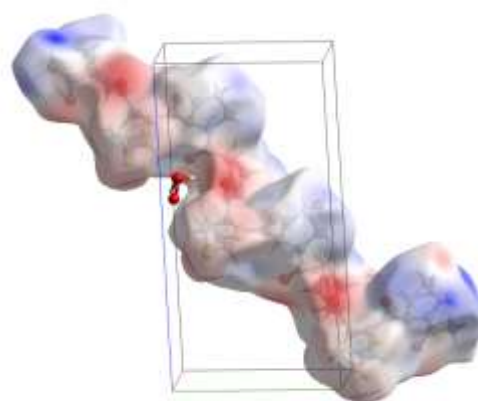

*Figure S15: Electrostatic potentials mapped on Hirshfeld surface of nonamer **14** X-ray structure. **A.** from prolines side (positive potential), **B.** from trifluoromethyl-pseudoprolines side (negative potential)*

## IX. COMPARISON OF HYDROPHOBICITY BY UPLC-MS RETENTION TIME

| Oligomers                                                                 | Retention time (min) |
|---------------------------------------------------------------------------|----------------------|
| Ac-[Pro] <sub>6</sub> -NH <sub>2</sub> <b>6</b>                           | 1.34                 |
| Ac-[Pro-CF <sub>3</sub> ΨPro-Pro] <sub>2</sub> -NH <sub>2</sub> <b>7</b>  | 1.71                 |
| Ac-[Pro] <sub>9</sub> -NH <sub>2</sub> <b>10</b>                          | 1.69                 |
| Ac-[Pro-CF <sub>3</sub> ΨPro-Pro] <sub>3</sub> -NH <sub>2</sub> <b>14</b> | 2.03                 |

Table S8: Peptide retention time for hydrophobicity comparison (measured with a 10-90% ACN + 0.1% TFA gradient over 3 min)

The hydrophobicity of the oligomers has been assessed thanks to the retention time values obtained by RP-UPLC (Table S8). Retention time values of hexamers **6** and **7** and nonamer **14** were reported in Table S3 (see section IV.4). For comparison propose, the UPLC-MS of nonamer **10** was performed using the same gradient, *i.e.* 10-90% ACN + 0.1% TFA using H<sub>2</sub>O + 0.1% TFA as a co-solvent (UV chromatogram below). The retention time values of fluorinated oligomers were found all superior to that of their non-fluorinated analogues, in accordance with an increase of hydrophobicity.

### Nonamer **10**

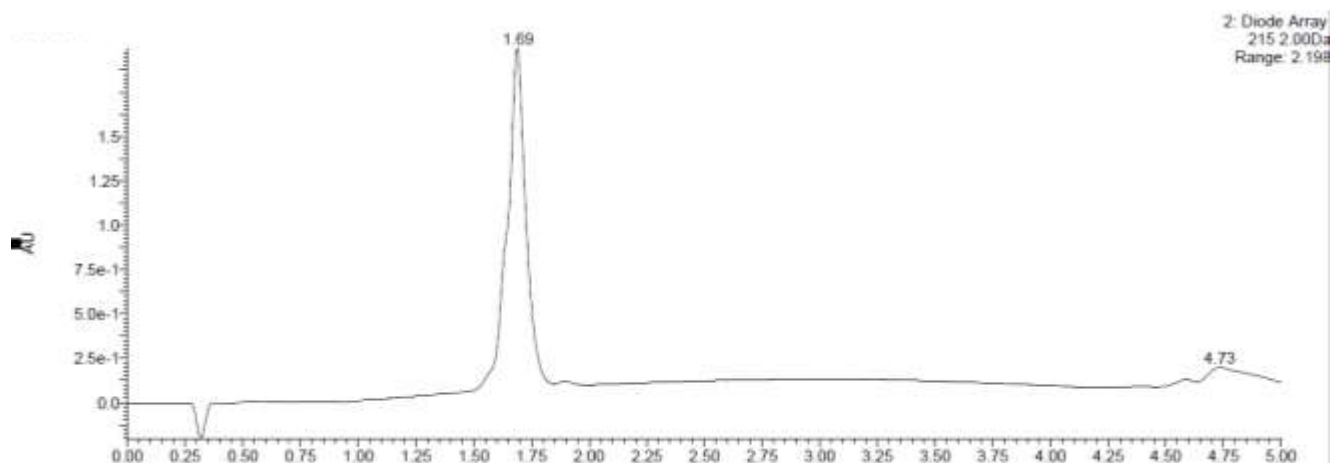

## X. RESULTS OF STABILITY TEST WITH PRONASE OF HEXAMERS 6-7

### X.1 Test followed by UPLC-MS

A.

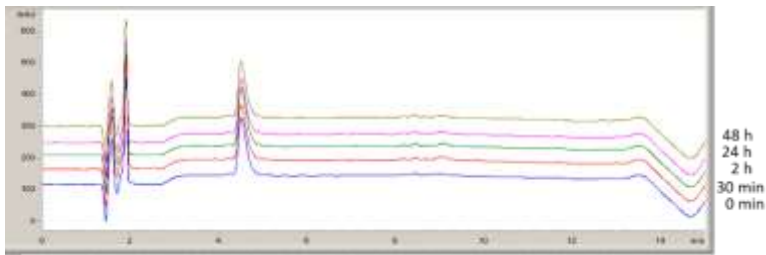

B.

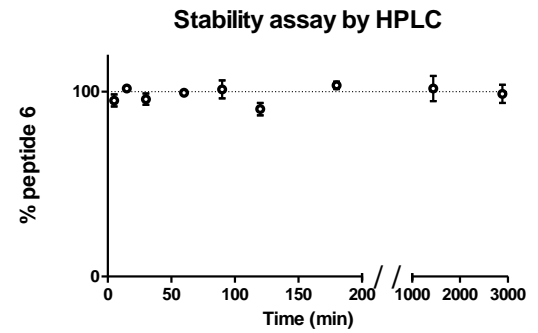

Figure S16: **A.** HPLC chromatogram at 214 nm of hexamer 6; **B.** Amount of intact hexamer 6 (%) quantified over time by HPLC

A.

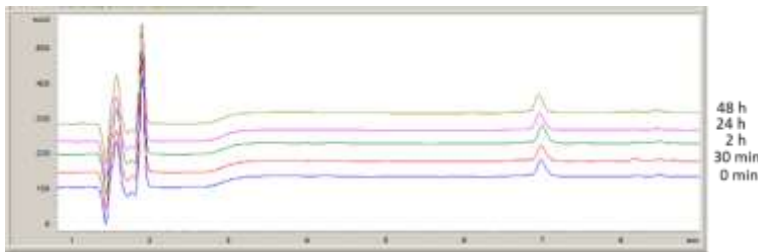

B.

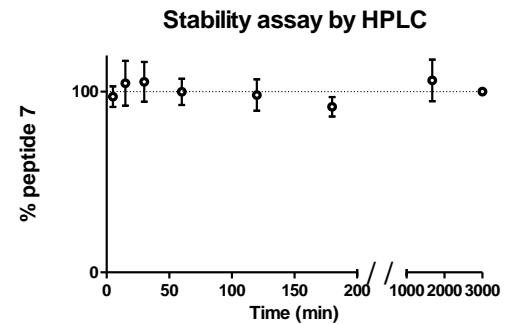

Figure S17: **A.** HPLC chromatogram at 214 nm of hexamer 7; **B.** Amount of intact hexamer 7 (%) quantified over time by HPLC

| Time     | Ac-[Pro] <sub>6</sub> -NH <sub>2</sub> 6 |           | Ac-[Pro-CF <sub>3</sub> ΨPro-Pro] <sub>2</sub> -NH <sub>2</sub> 7 |           |
|----------|------------------------------------------|-----------|-------------------------------------------------------------------|-----------|
|          | Peak area<br>(UV trace at 214 nm)        | % peptide | Peak area<br>(UV trace at 214 nm)                                 | % peptide |
| 5 min    | 409                                      | 108       | 2319                                                              | 99        |
|          | 357                                      | 94        | 2254                                                              | 97        |
|          | 337                                      | 89        | 2068                                                              | 89        |
| 15 min   | 409                                      | 108       | 2319                                                              | 99        |
|          | 357                                      | 94        | 2254                                                              | 97        |
|          | 337                                      | 89        | 2068                                                              | 89        |
| 30 min   | 321                                      | 84        | 2115                                                              | 91        |
|          | 463                                      | 122       | 2213                                                              | 95        |
|          | 412                                      | 108       | 2360                                                              | 101       |
| 60 min   | 345                                      | 91        | 2263                                                              | 97        |
|          | 432                                      | 114       | 2338                                                              | 100       |
|          | 356                                      | 94        | 2330                                                              | 100       |
| 90 min   | 332                                      | 87        | 2298                                                              | 98        |
|          | 436                                      | 115       | 2190                                                              | 94        |
|          | 345                                      | 91        | 2571                                                              | 110       |
| 120 min  | 332                                      | 87        | 2261                                                              | 97        |
|          | 436                                      | 115       | 2039                                                              | 87        |
|          | 345                                      | 91        | 2017                                                              | 86        |
| 180 min  | 326                                      | 97        | 2340                                                              | 100       |
|          | 288                                      | 76        | 2376                                                              | 102       |
|          | 367                                      | 86        | 2495                                                              | 107       |
| 1440 min | 358                                      | 94        | 2129                                                              | 91        |
|          | 388                                      | 102       | 2664                                                              | 114       |
|          | 432                                      | 114       | 2295                                                              | 98        |
| 2880 min | 358                                      | 94        | 2216                                                              | 95        |
|          | 445                                      | 117       | 2152                                                              | 92        |
|          | n.o                                      | n.o       | 2519                                                              | 108       |

n.o. : not observed

Table S9: Peptide stability (%) monitoring by HPLC



## X.2 Followed by $^{19}\text{F}$ NMR

A.

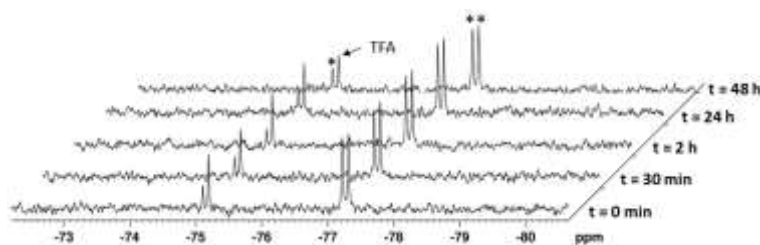

B.

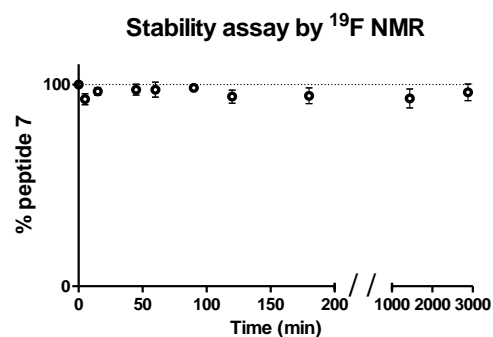

Figure S18: **A.**  $^{19}\text{F}$  NMR spectra of hexamer **7**; **B.** Amount of intact hexamer **7** (%) quantified over time by  $^{19}\text{F}$  NMR

A second peak close to the signal of TFA is observed on  $^{19}\text{F}$  NMR spectra. This signal only appears when using Tris buffer solution. Despite several attempts to control whether it could correspond to a TFA salt of Tris compound, we were unable to confirm such hypothesis.

| Time     | Ac-[Pro-CF <sub>3</sub> ΨPro-Pro] <sub>2</sub> -NH <sub>2</sub> 7 |           |
|----------|-------------------------------------------------------------------|-----------|
|          | Peptide integration vs TFA peak = 1                               | % peptide |
| 0 min    | 3,41 (mean value from triplicate)                                 | 100       |
| 5 min    | 3,12                                                              | 92        |
|          | 3,11                                                              | 91        |
|          | 3,26                                                              | 96        |
| 15 min   | 3,33                                                              | 98        |
|          | 3,29                                                              | 97        |
|          | 3,22                                                              | 94        |
| 45 min   | 3,41                                                              | 100       |
|          | 3,33                                                              | 98        |
|          | 3,22                                                              | 94        |
| 60 min   | 3,41                                                              | 100       |
|          | 3,15                                                              | 93        |
|          | 3,41                                                              | 100       |
| 90 min   | 3,33                                                              | 98        |
|          | 3,11                                                              | 97        |
|          | 3,41                                                              | 100       |
| 120 min  | 3,29                                                              | 97        |
|          | 3,11                                                              | 91        |
|          | 3,22                                                              | 94        |
| 180 min  | 3,33                                                              | 98        |
|          | 3,10                                                              | 91        |
|          | 3,22                                                              | 94        |
| 1440 min | 2,9                                                               | 88        |
|          | 3,29                                                              | 97        |
|          | 3,22                                                              | 94        |
| 2880 min | 3,43                                                              | 101       |
|          | 3,22                                                              | 94        |
|          | 3,15                                                              | 93        |

Table S9: Peptide stability (%) monitoring by <sup>19</sup>F NMR

### X.3 Positive control assay

In order to control the Pronase activity, we performed a positive control assay. This test was performed on the peptide Mca-GKPILFFRLK(DNP)R-NH<sub>2</sub> substrate of cathepsin D. Complete degradation was observed after 15 min.

## XI. RESULTS OF VIABILITY ASSAYS OF HEXAMERS 6-7

### Incubation time with CHO-K1 cells: 1h

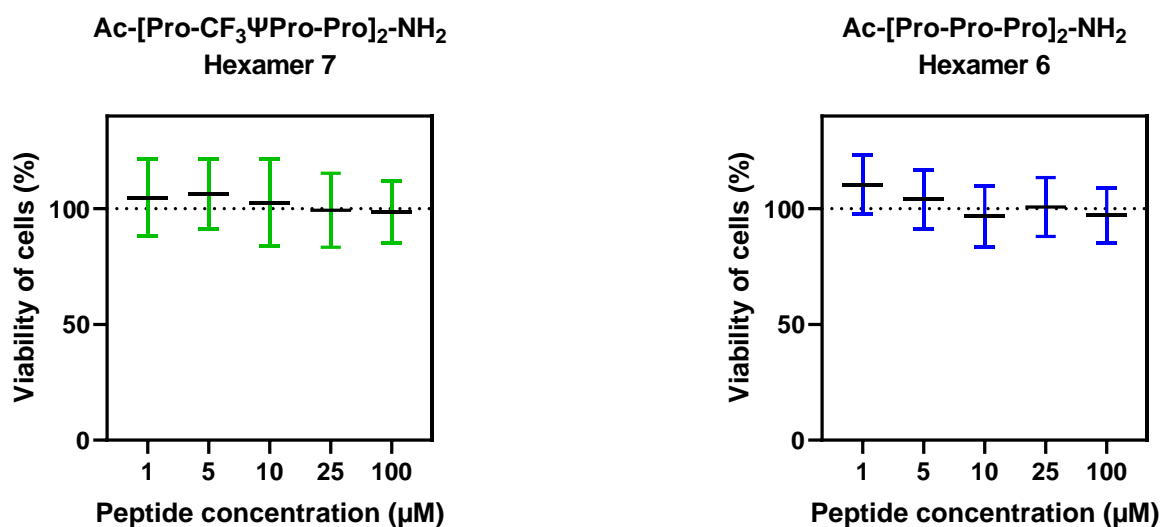

### Incubation time with CHO-K1 cells: 24h

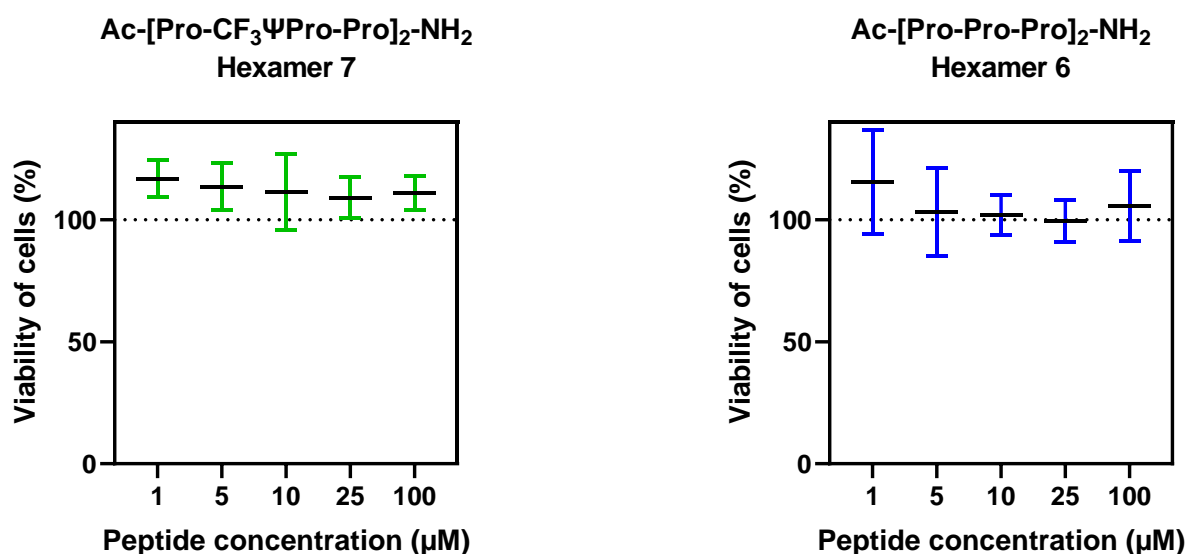

Figure S19: Results of viability assay on CHO-K1 with hexamers 6-7 with 1 hour incubation (top) and 24h incubation (bottom)

After 1h or 24h incubation of healthy CHO-K1 mammalian cells with our foldamers 6 and 7, no toxicity was revealed. Thus, the fluorinated foldamer 7 is as non-cytotoxic as its non-fluorinated analogue 6 counterpart.

## XII. NMR SPECTRA

### XII.1 Building blocks Fmoc-Pro-CF<sub>3</sub>ΨPro

#### XII.1.1 CF<sub>3</sub>ΨPro

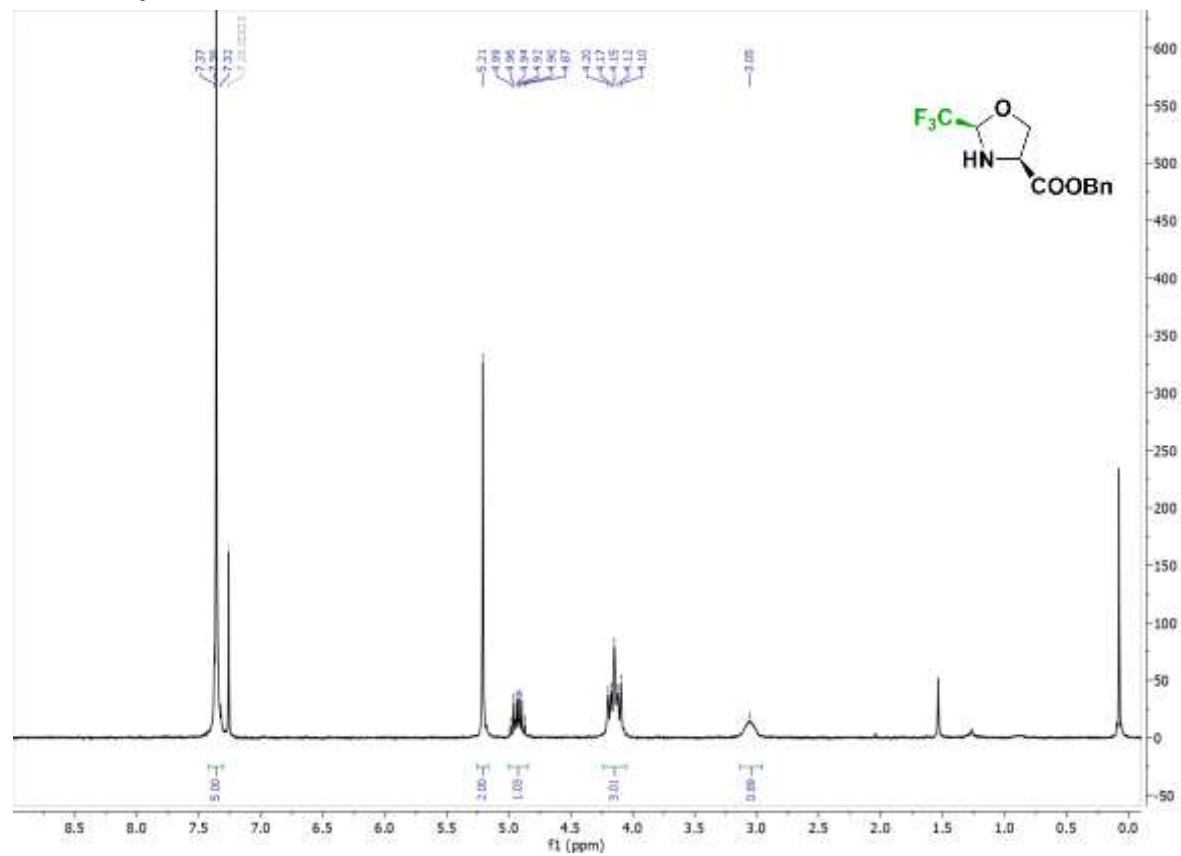

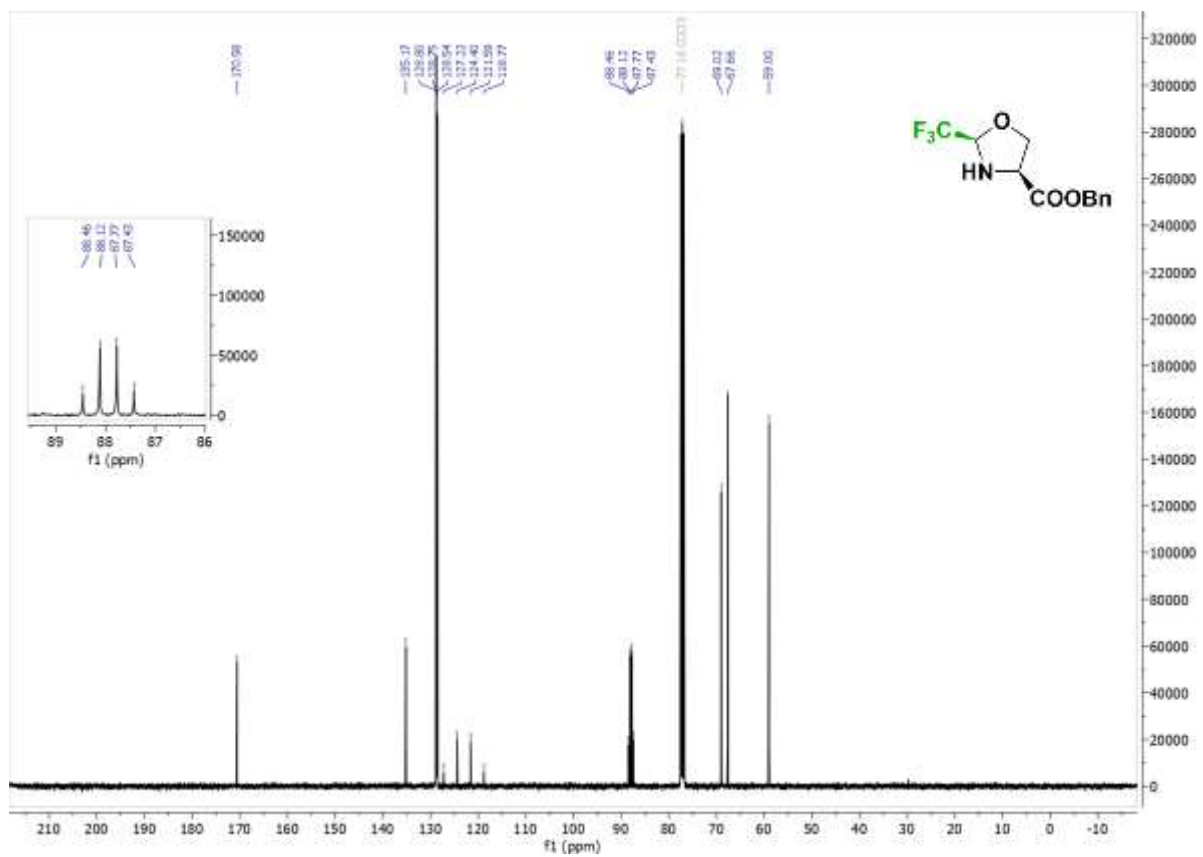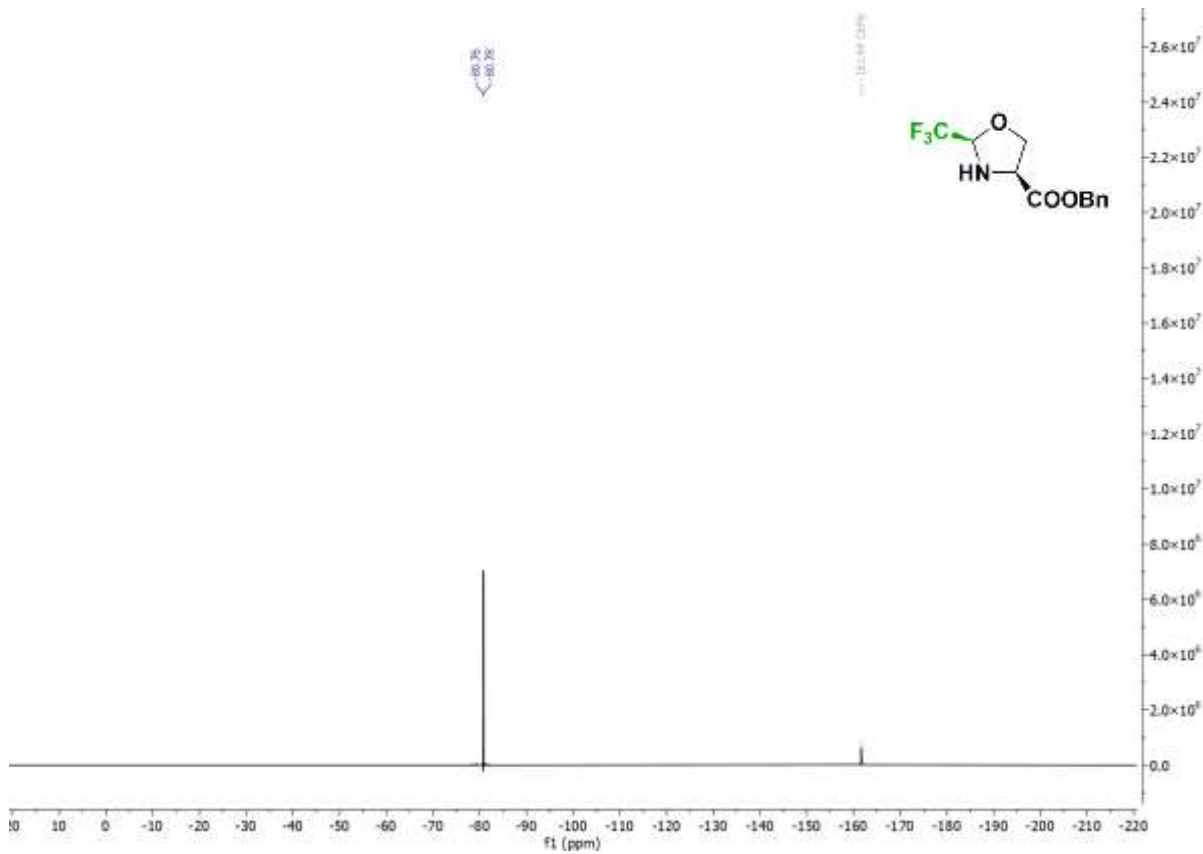

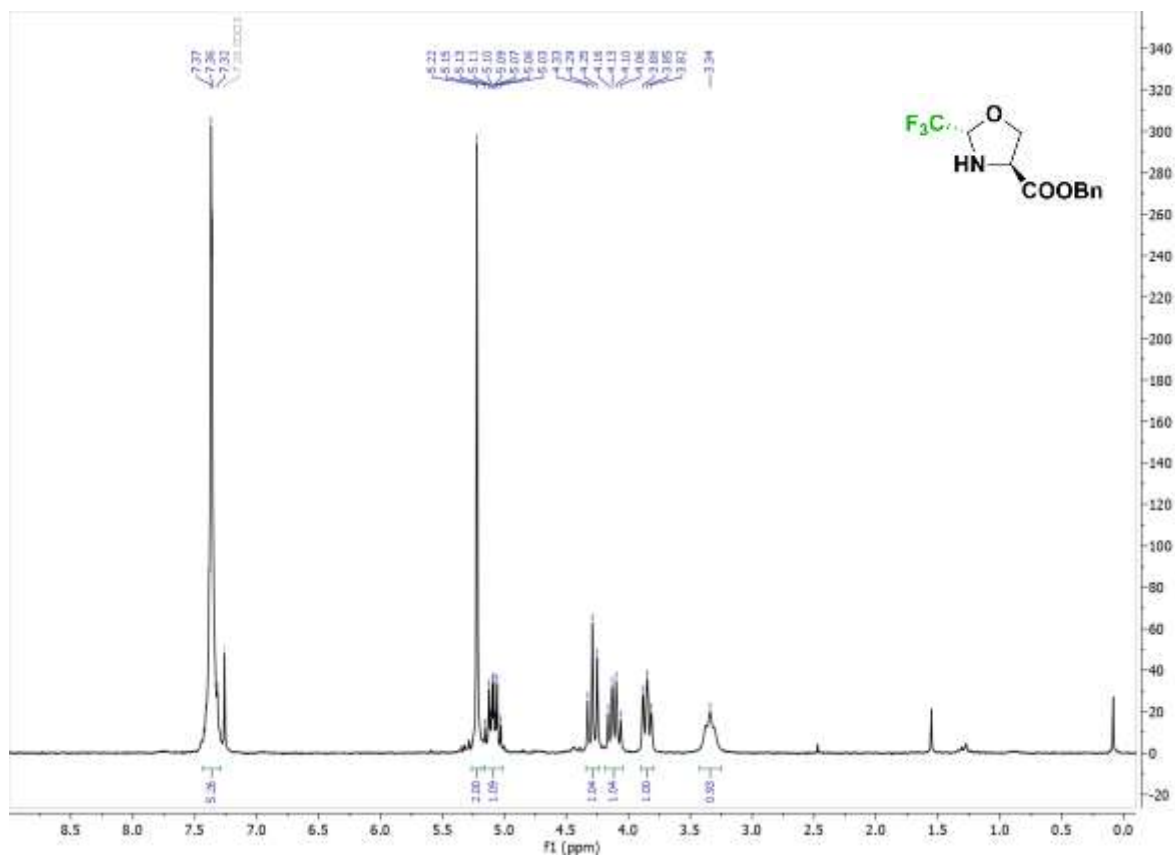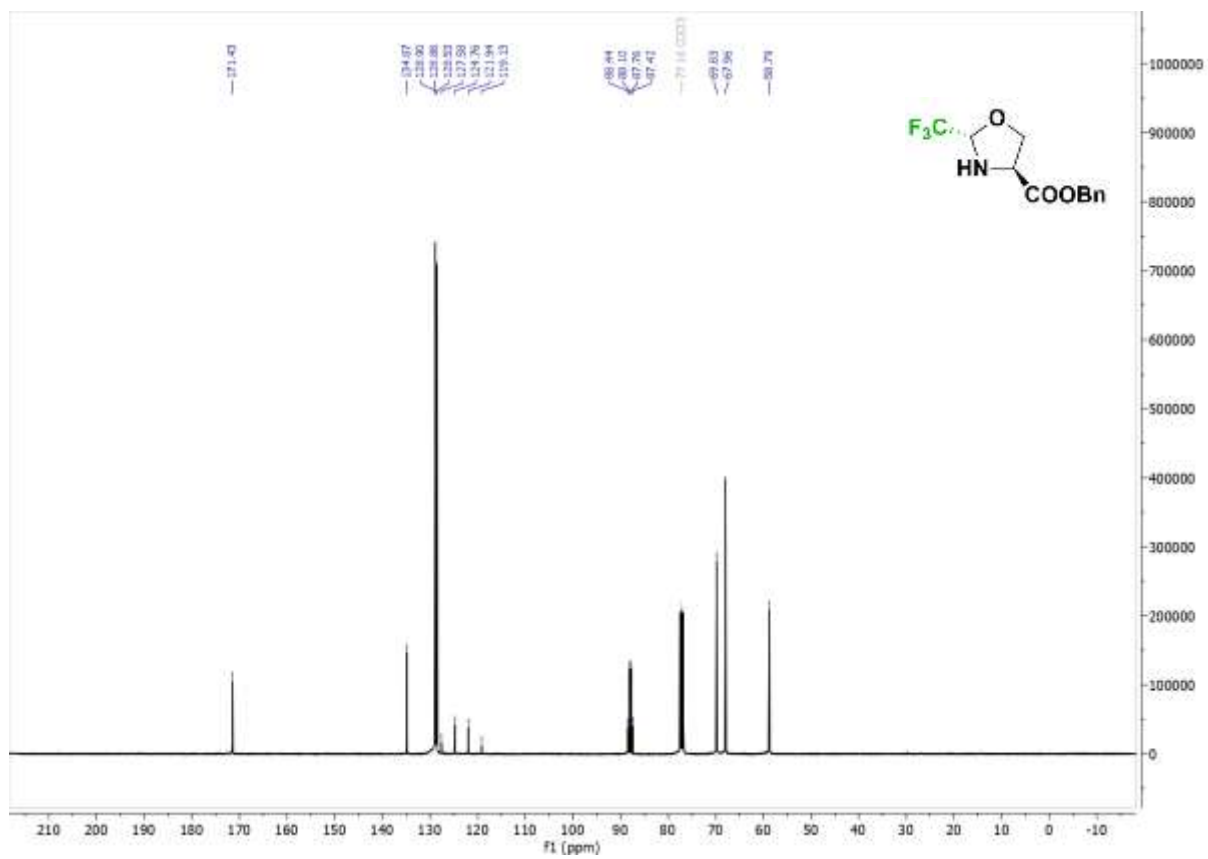

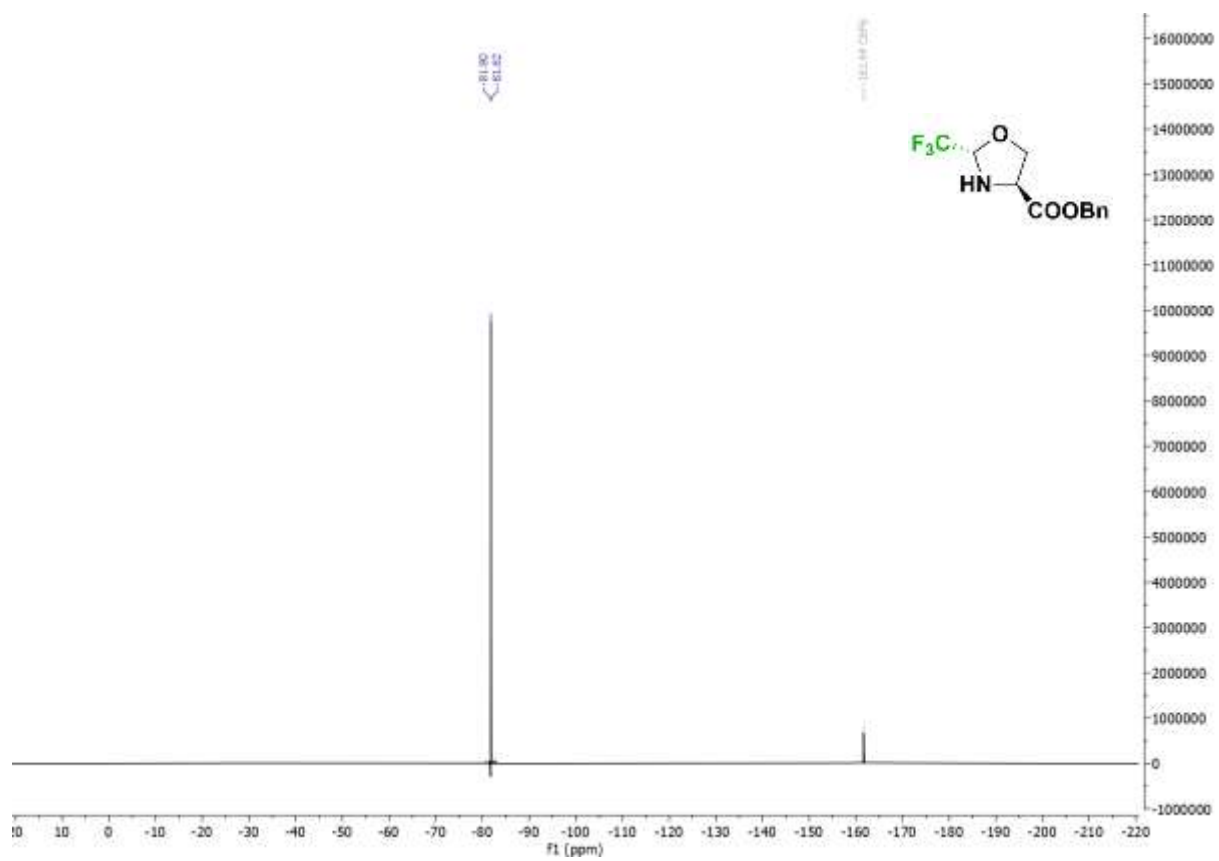

## XII.1.2 Fmoc-L-Pro-CF<sub>3</sub>ΨPro-OBn

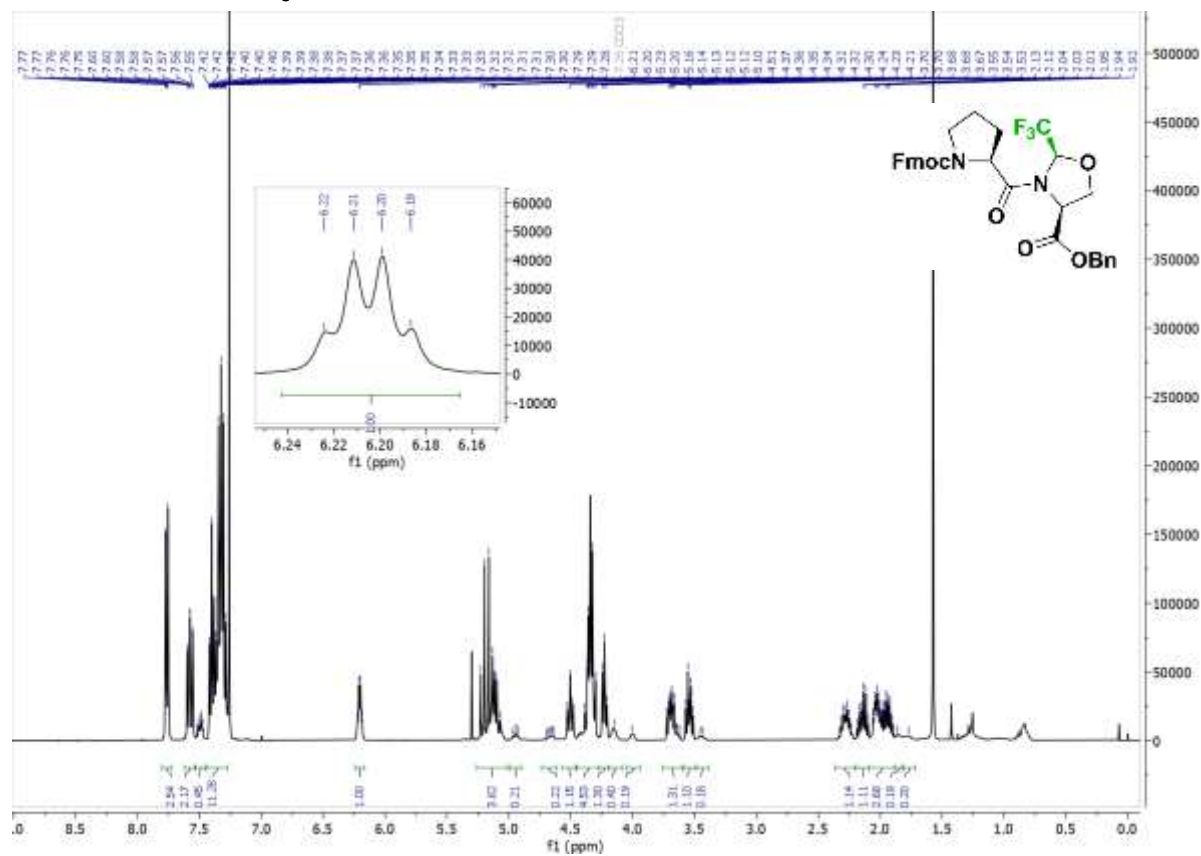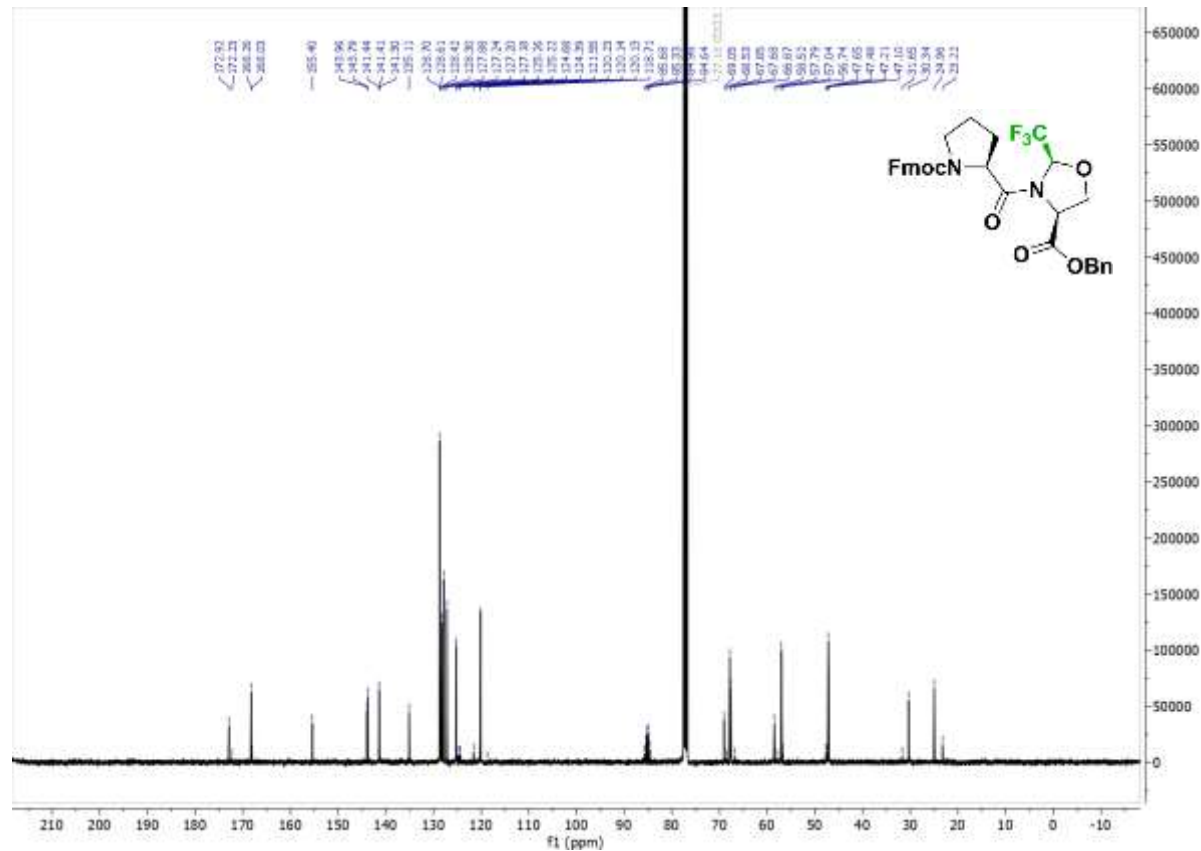









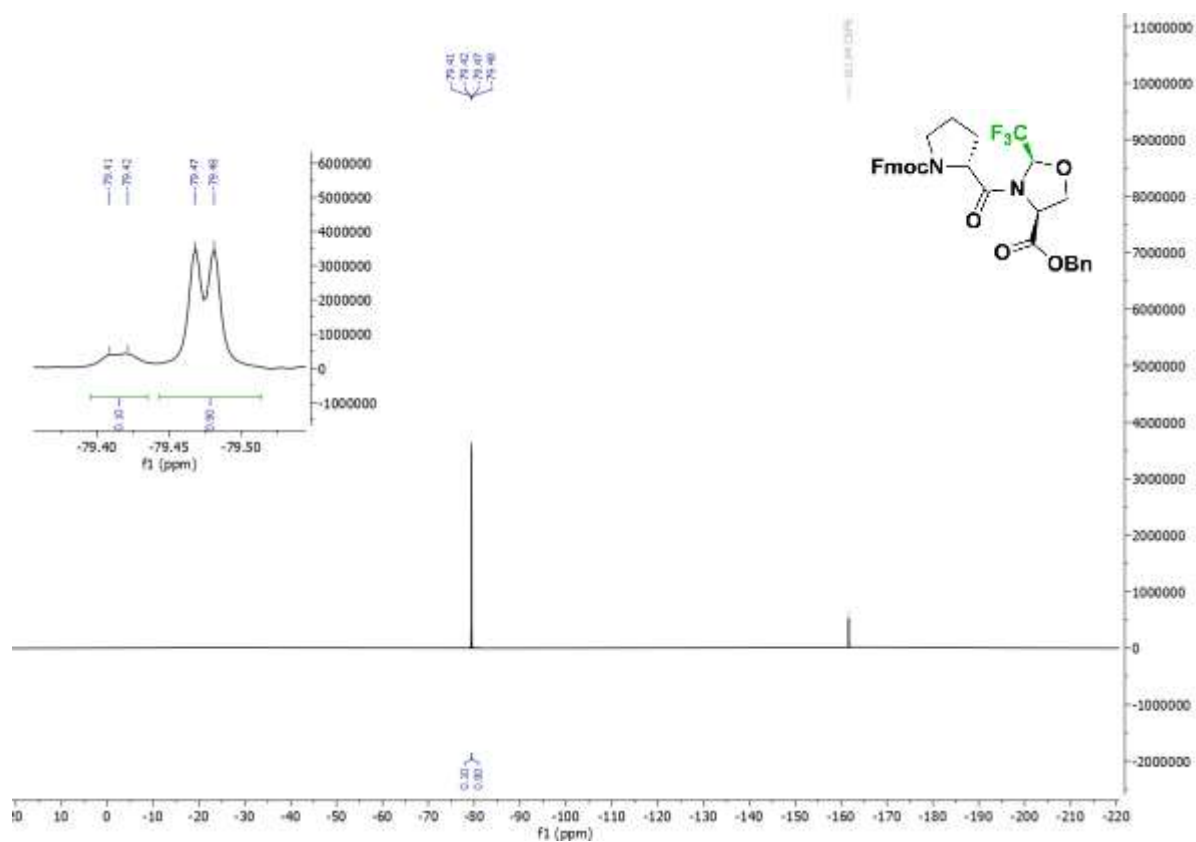

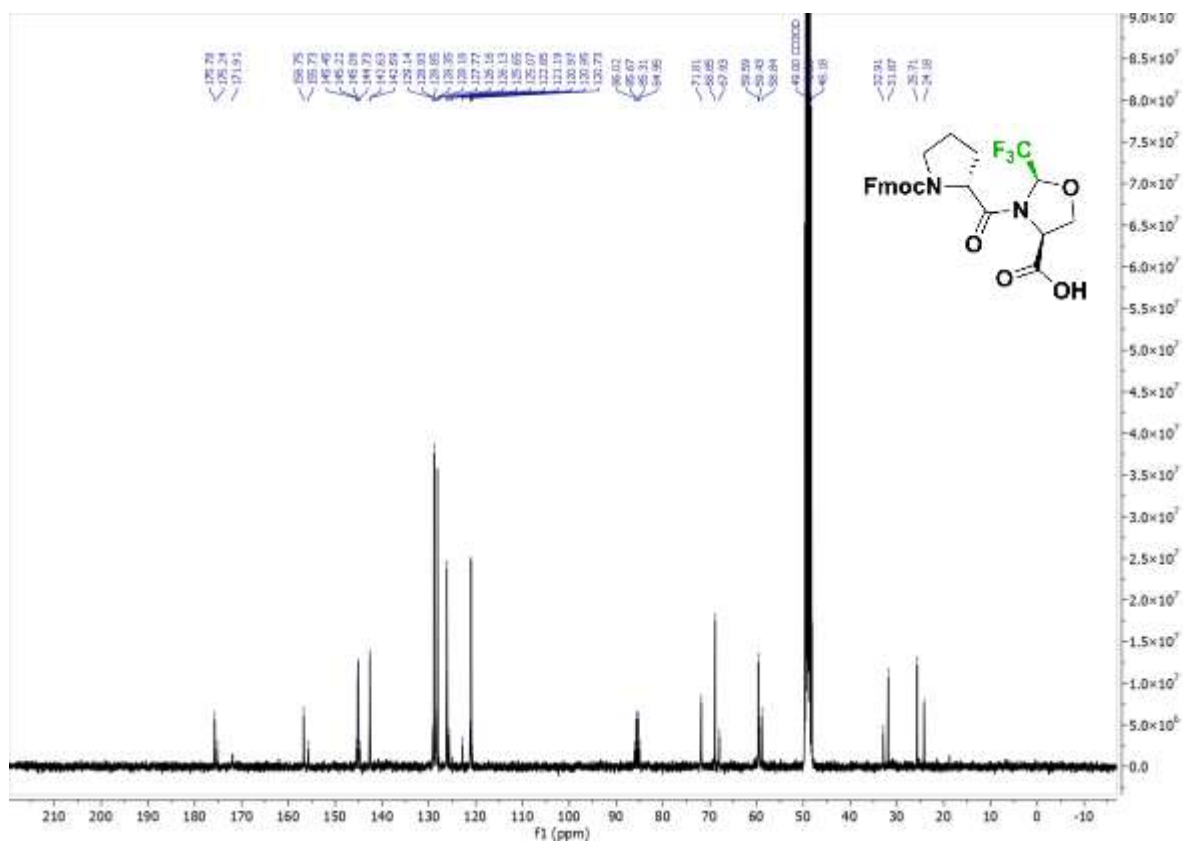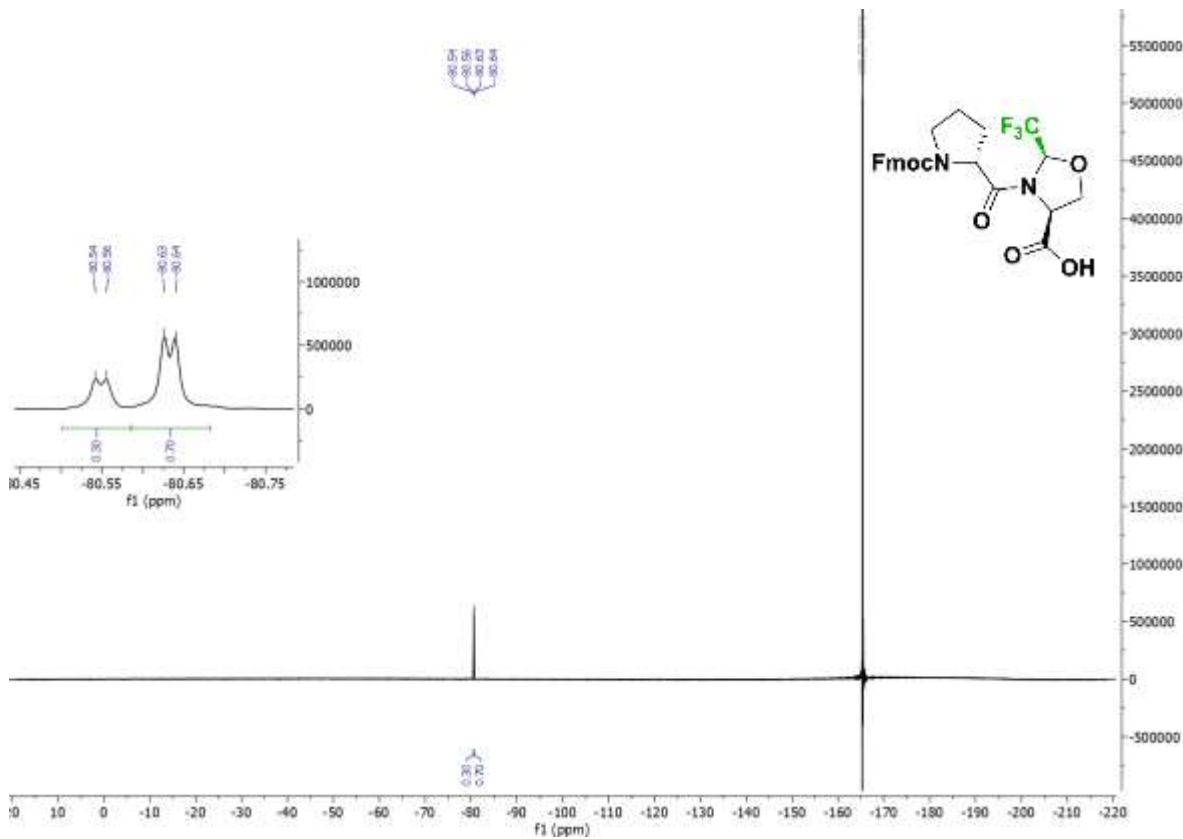



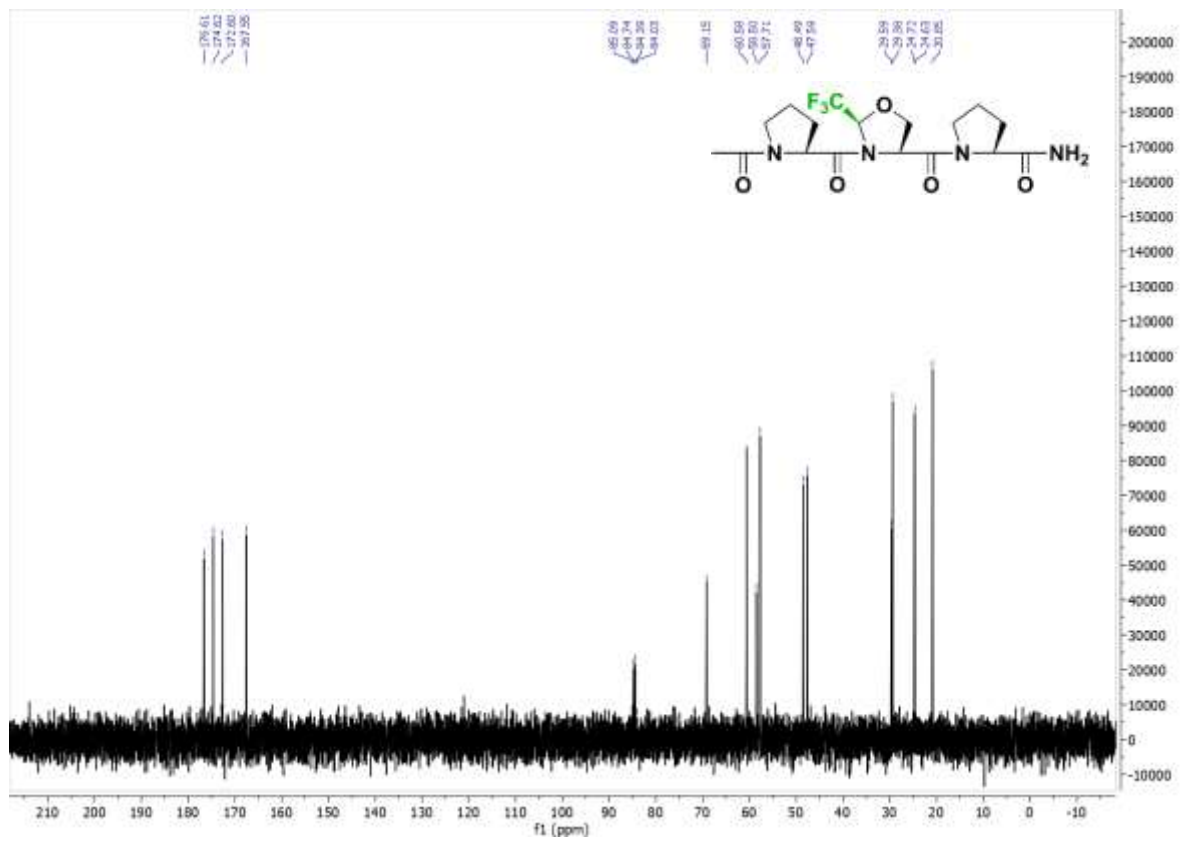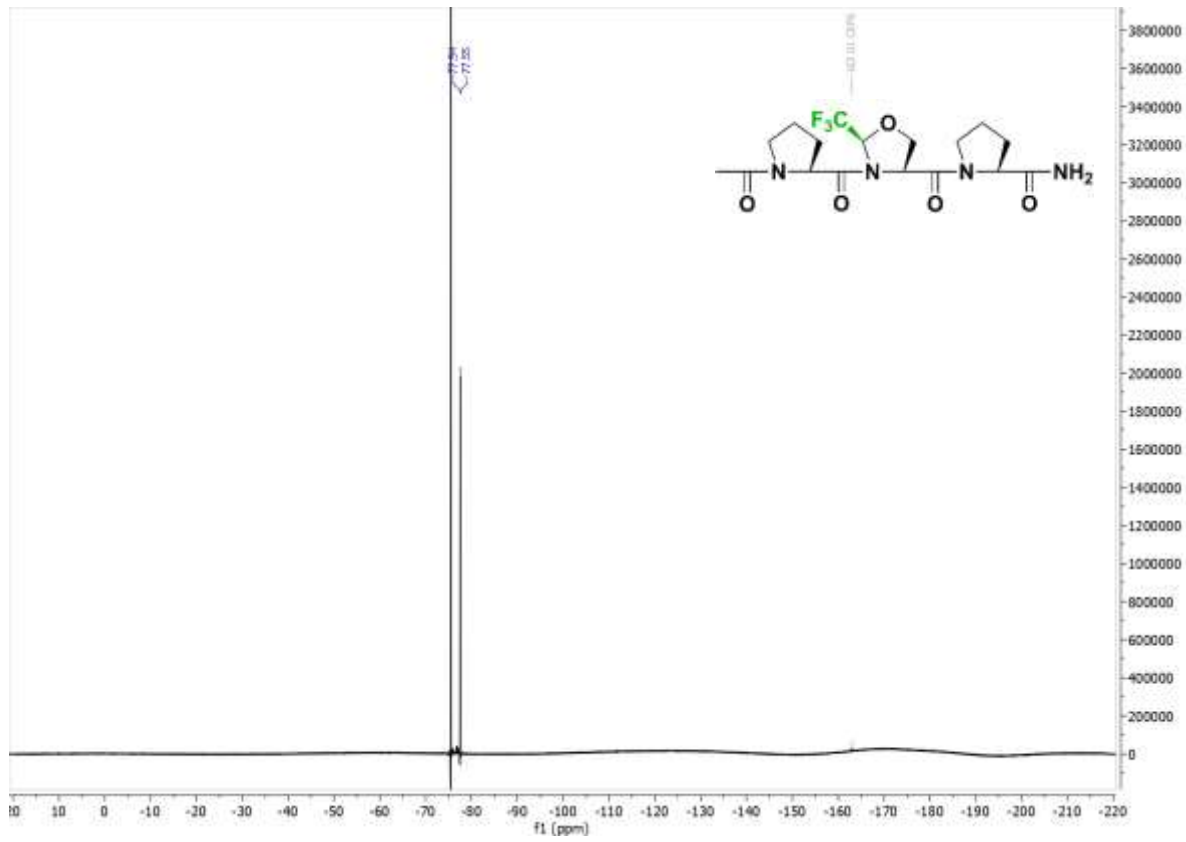

XII.2.2 Trimer 3

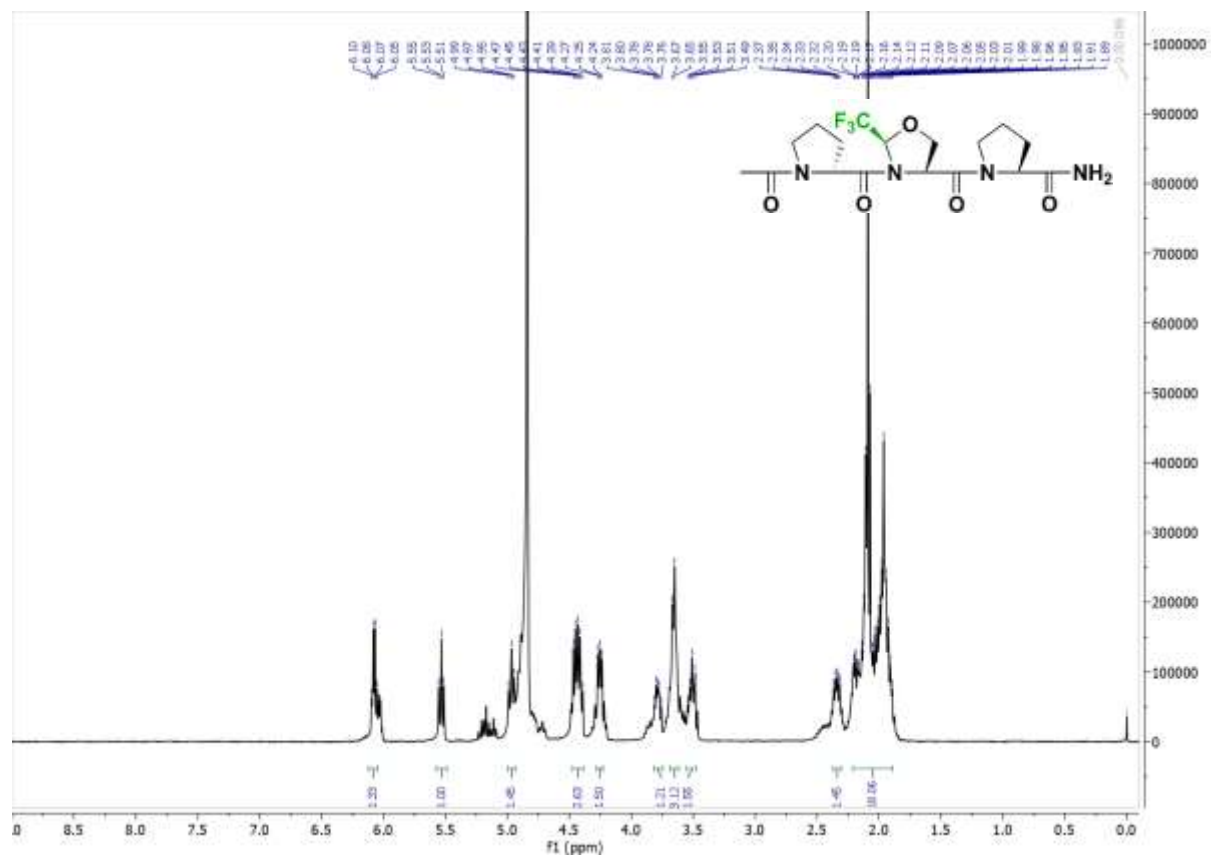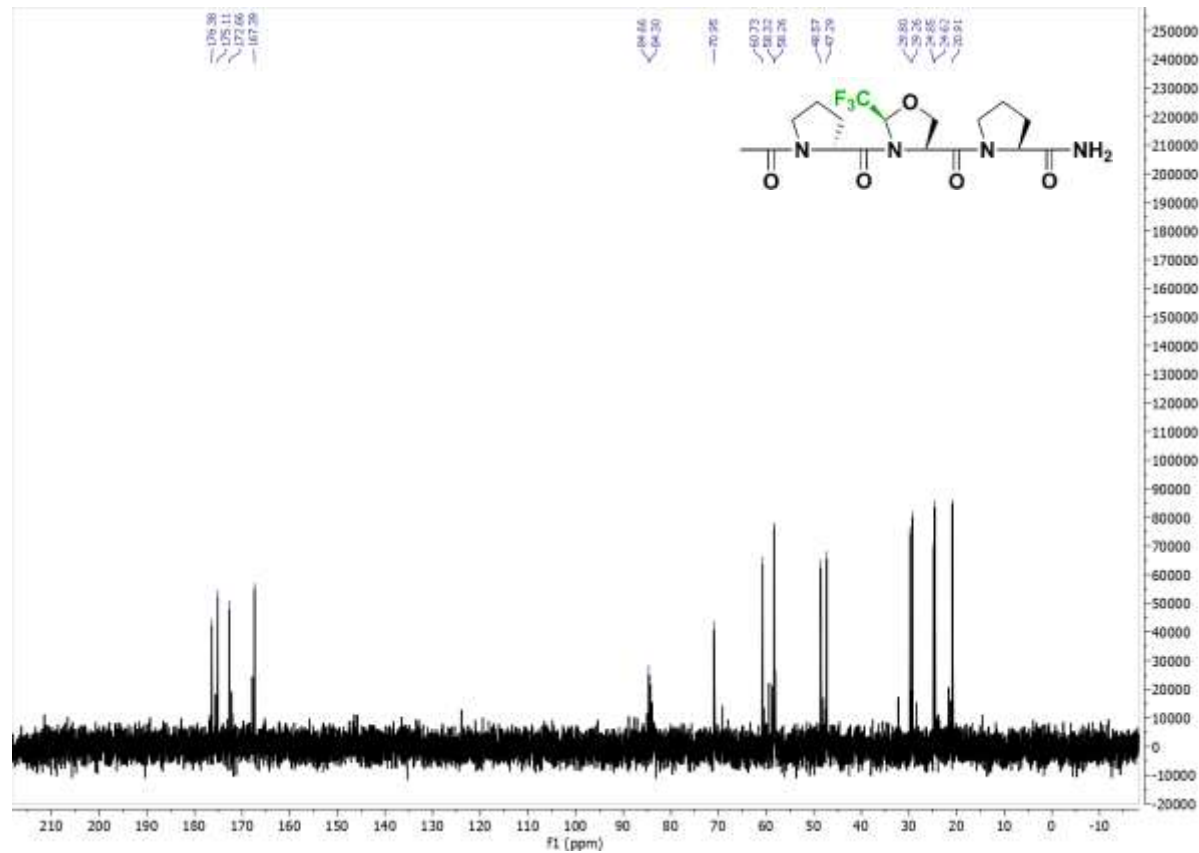



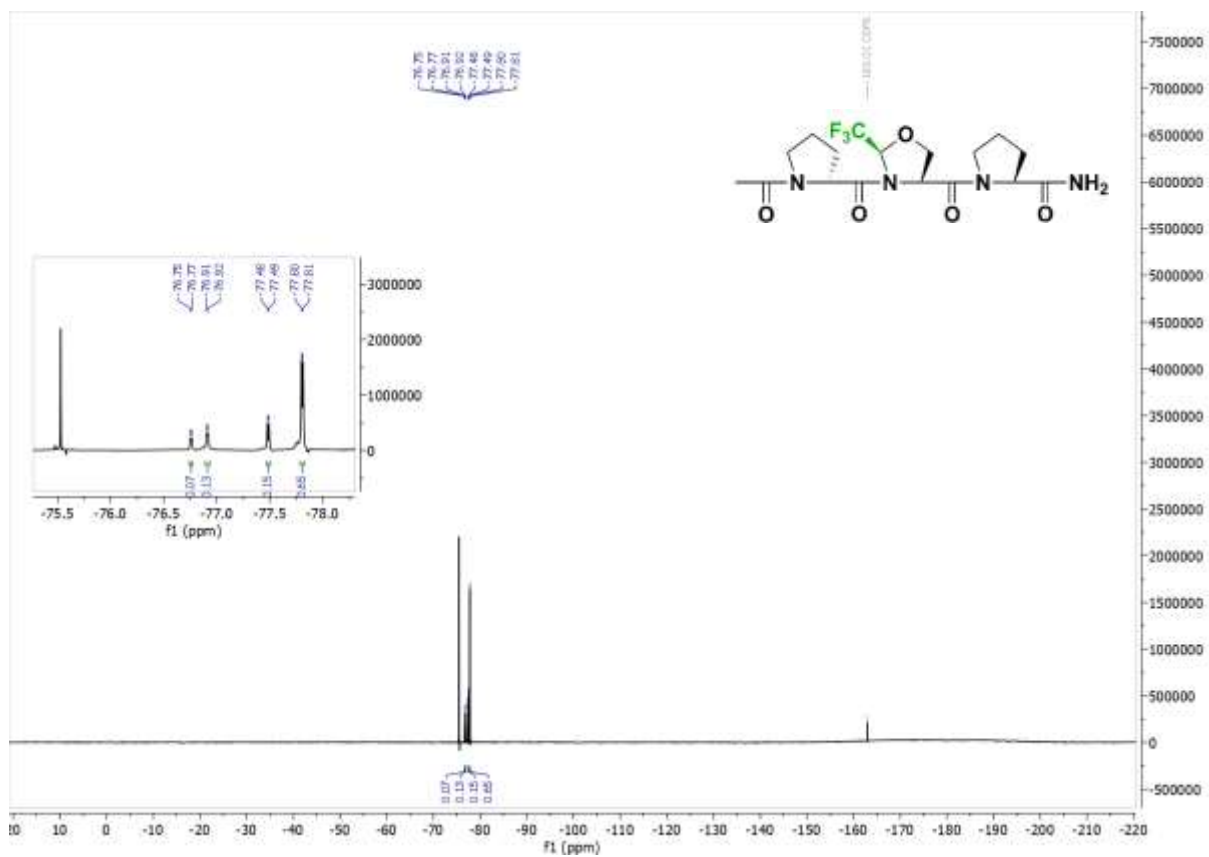

### XII.2.3 Trimer 4

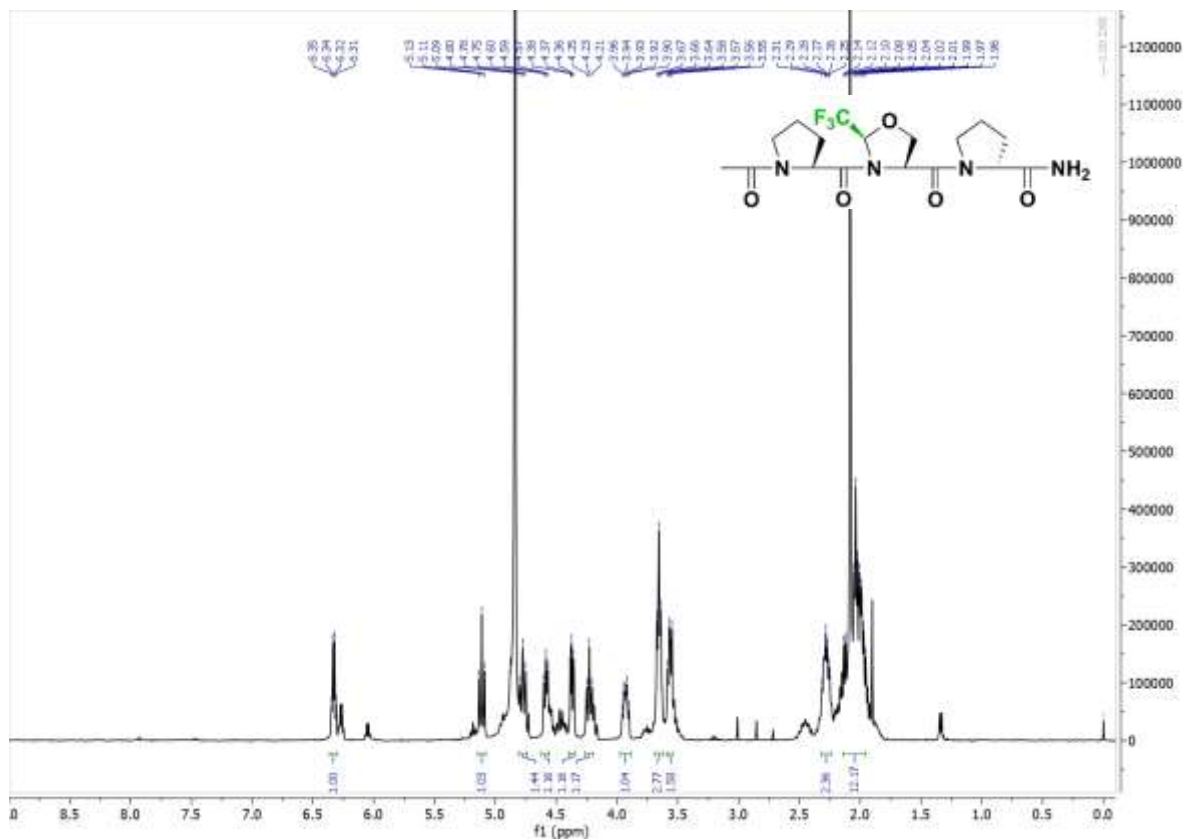

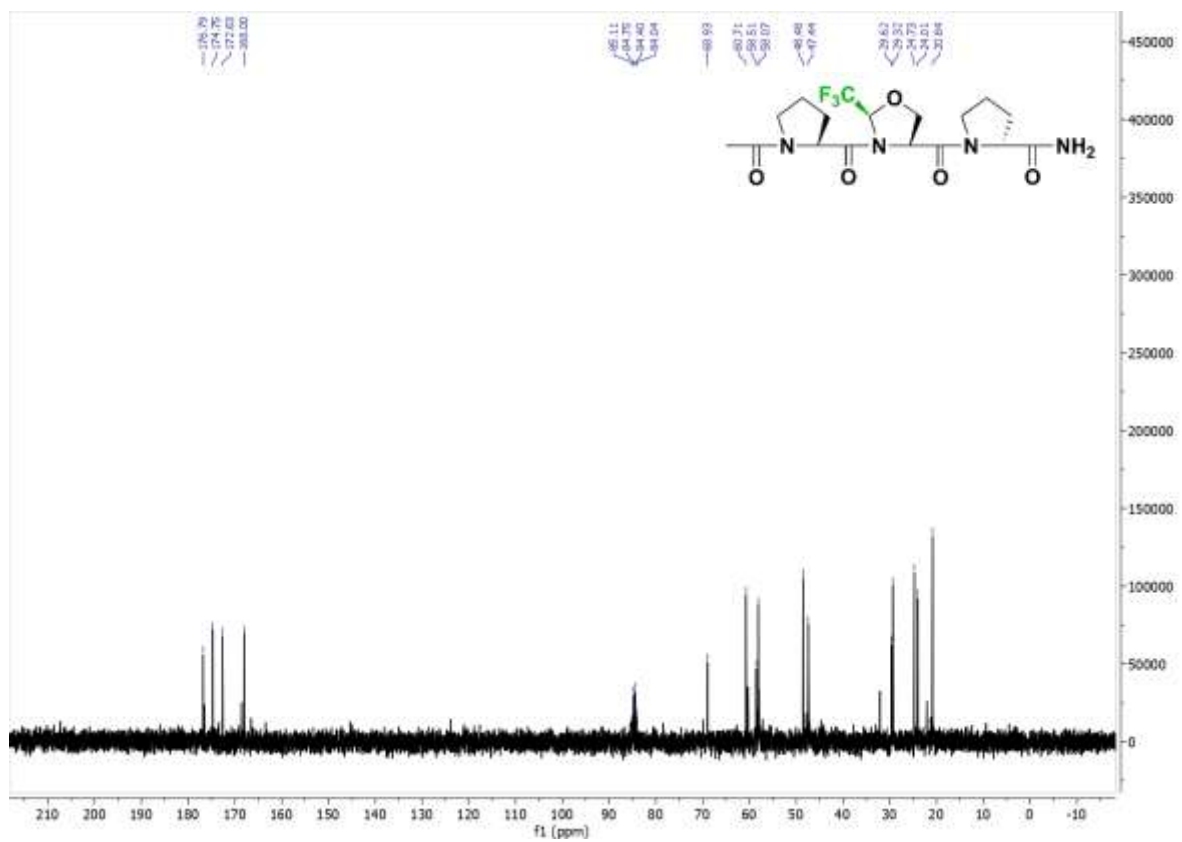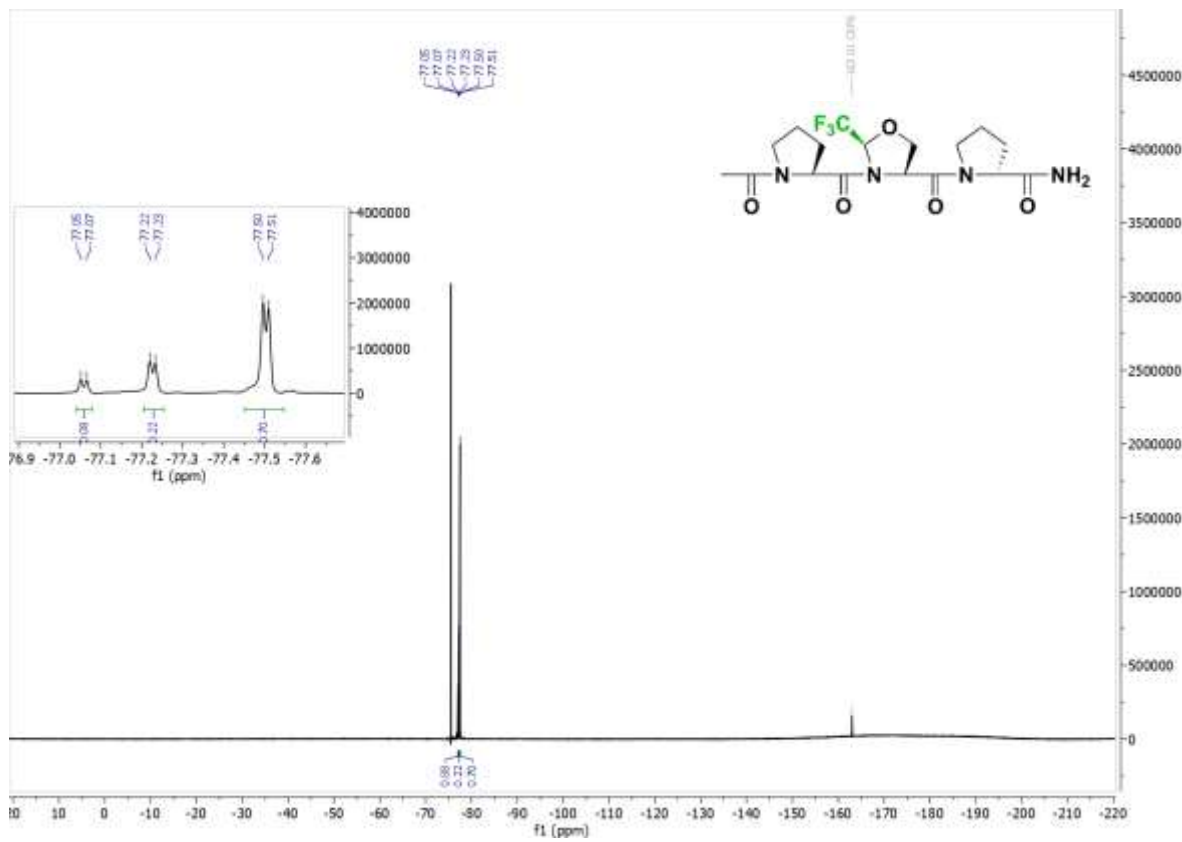





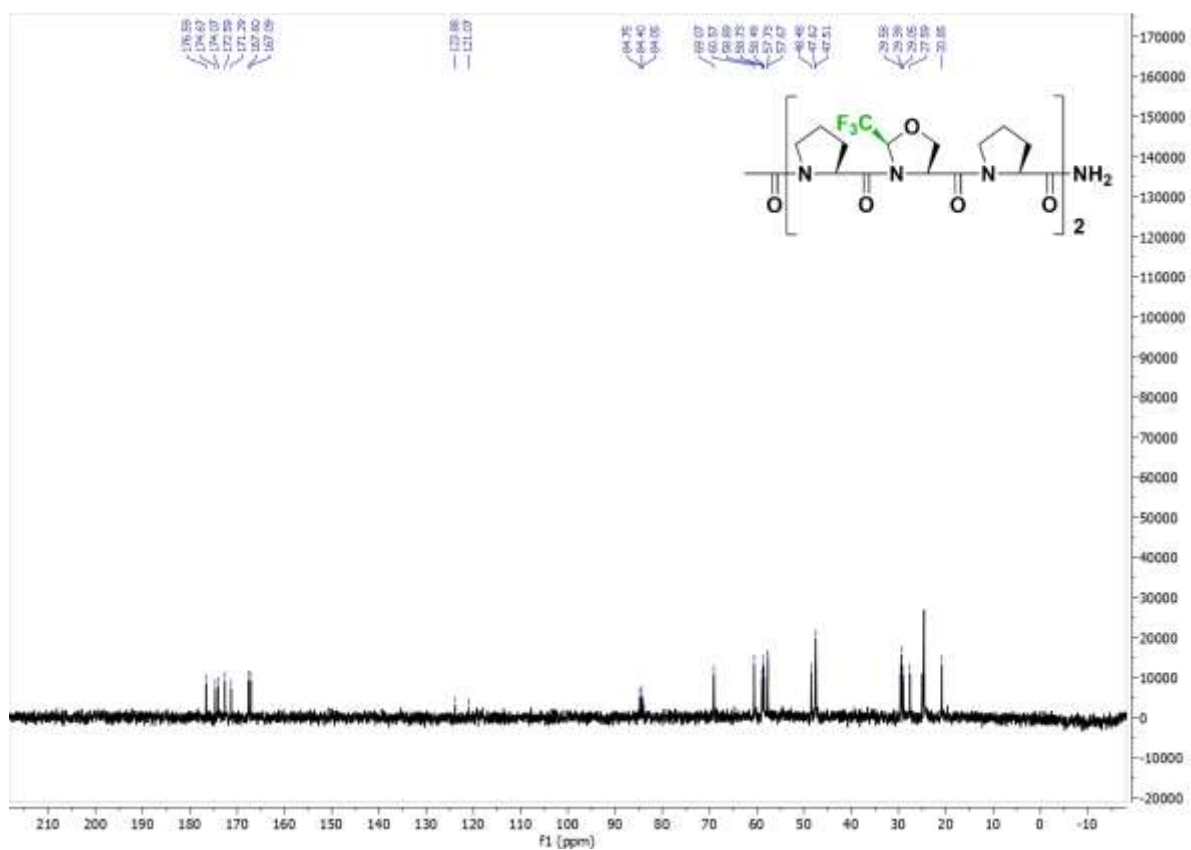

XII.2.6 Nonamer 14

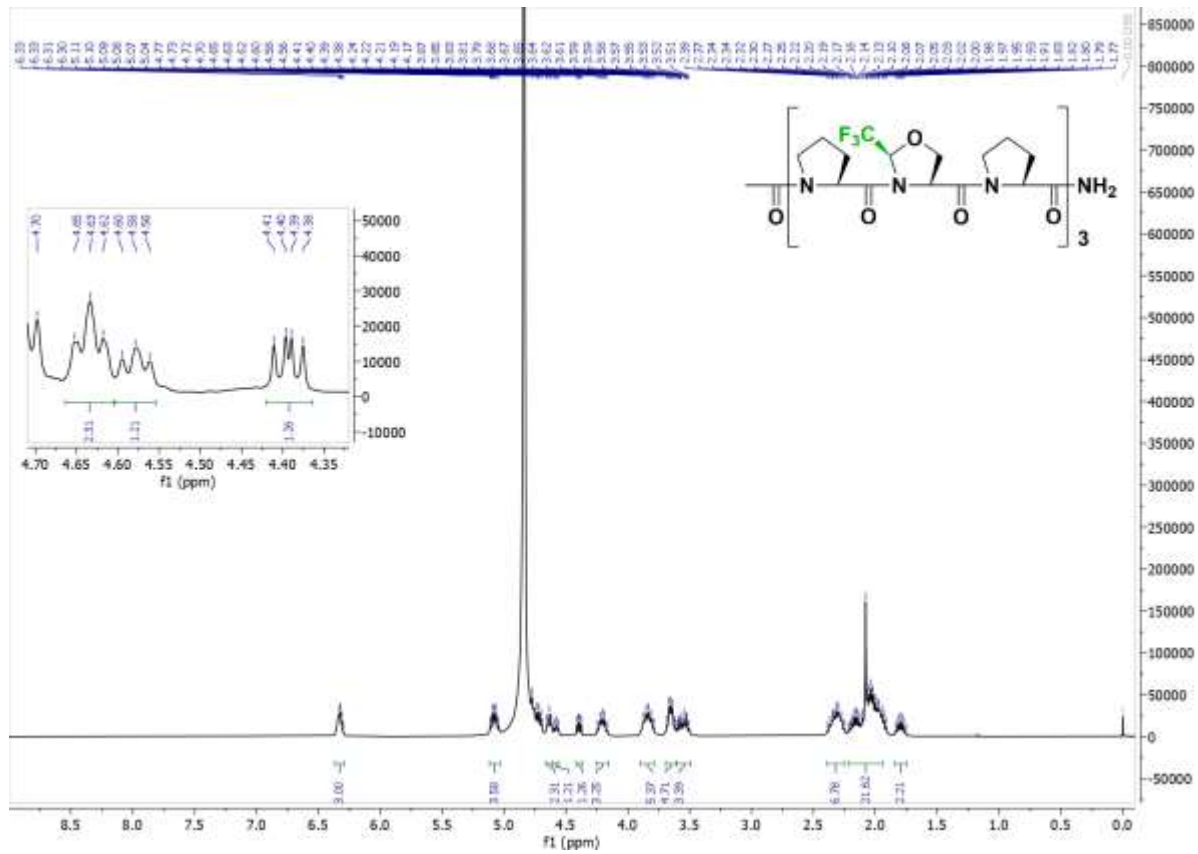

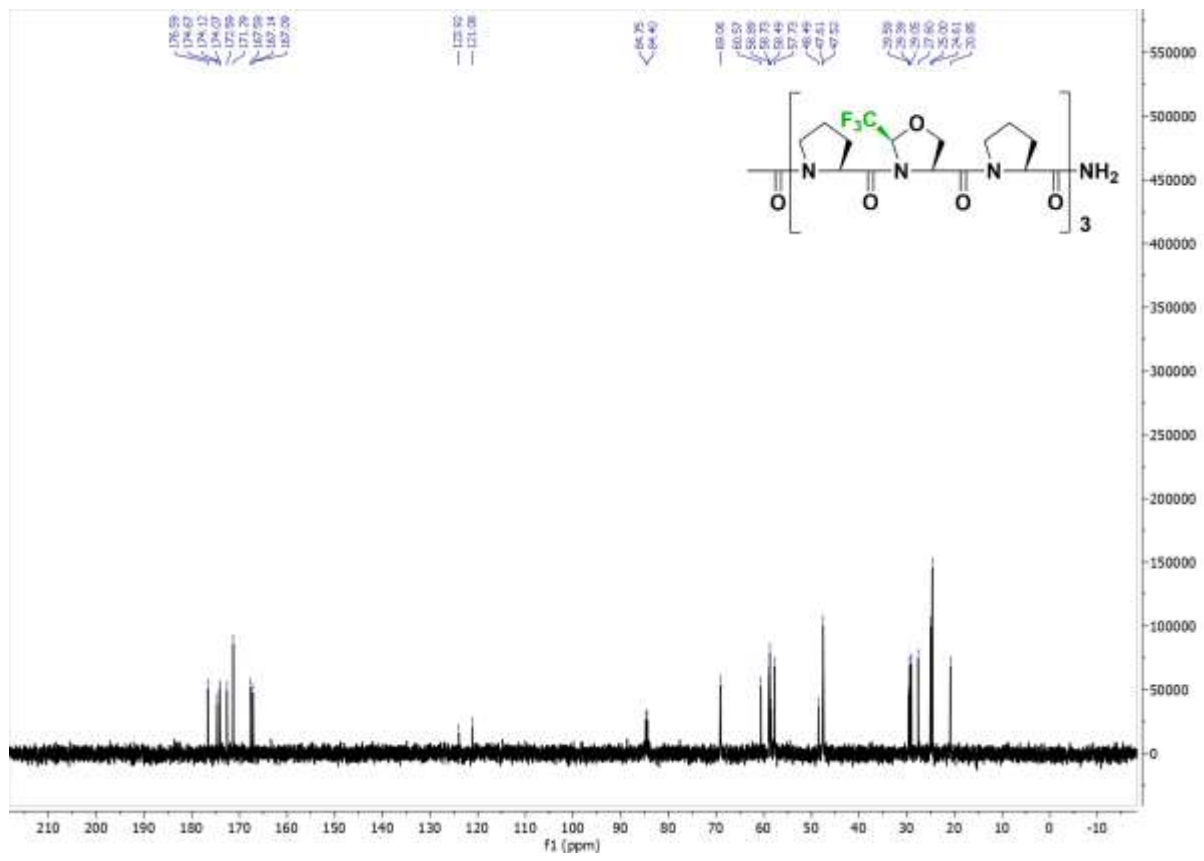

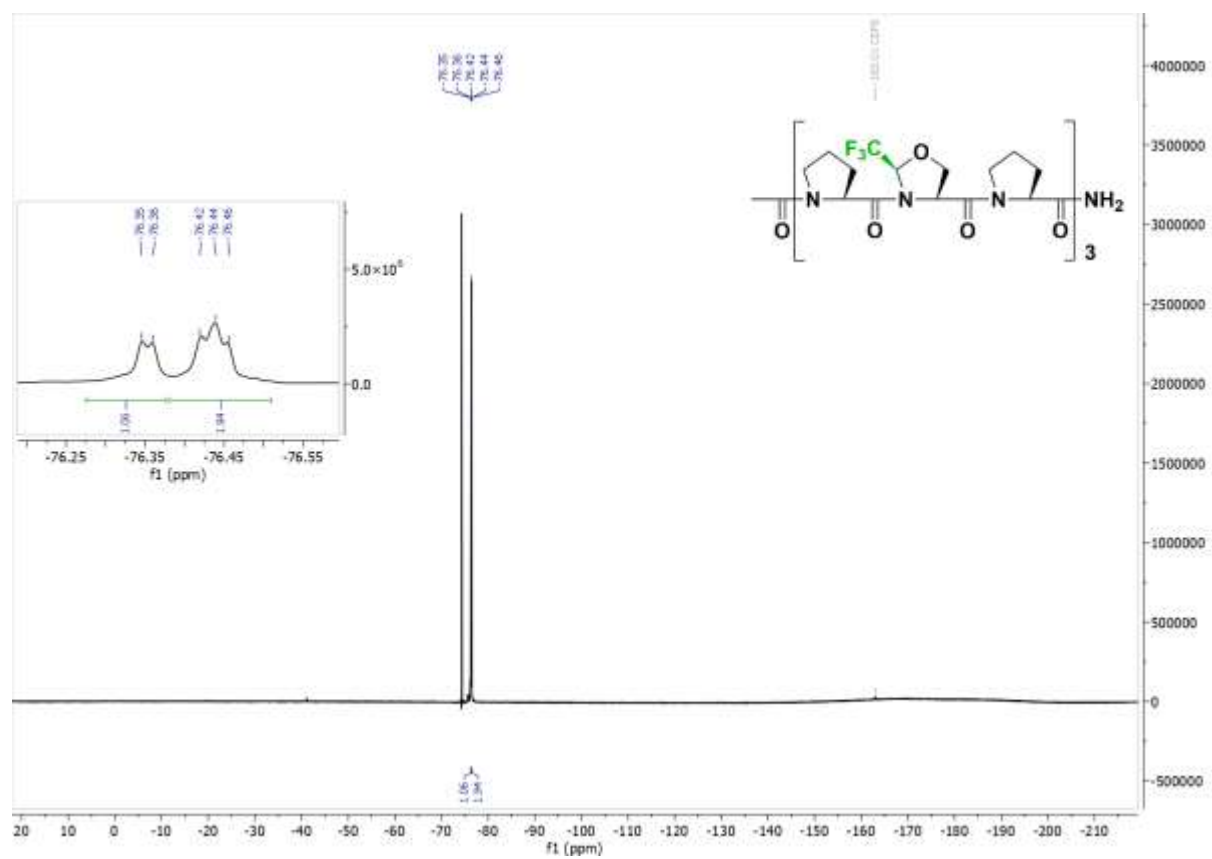



## XII.3 Chromophores

### XII.3.1 Ac-Pro-NHMe

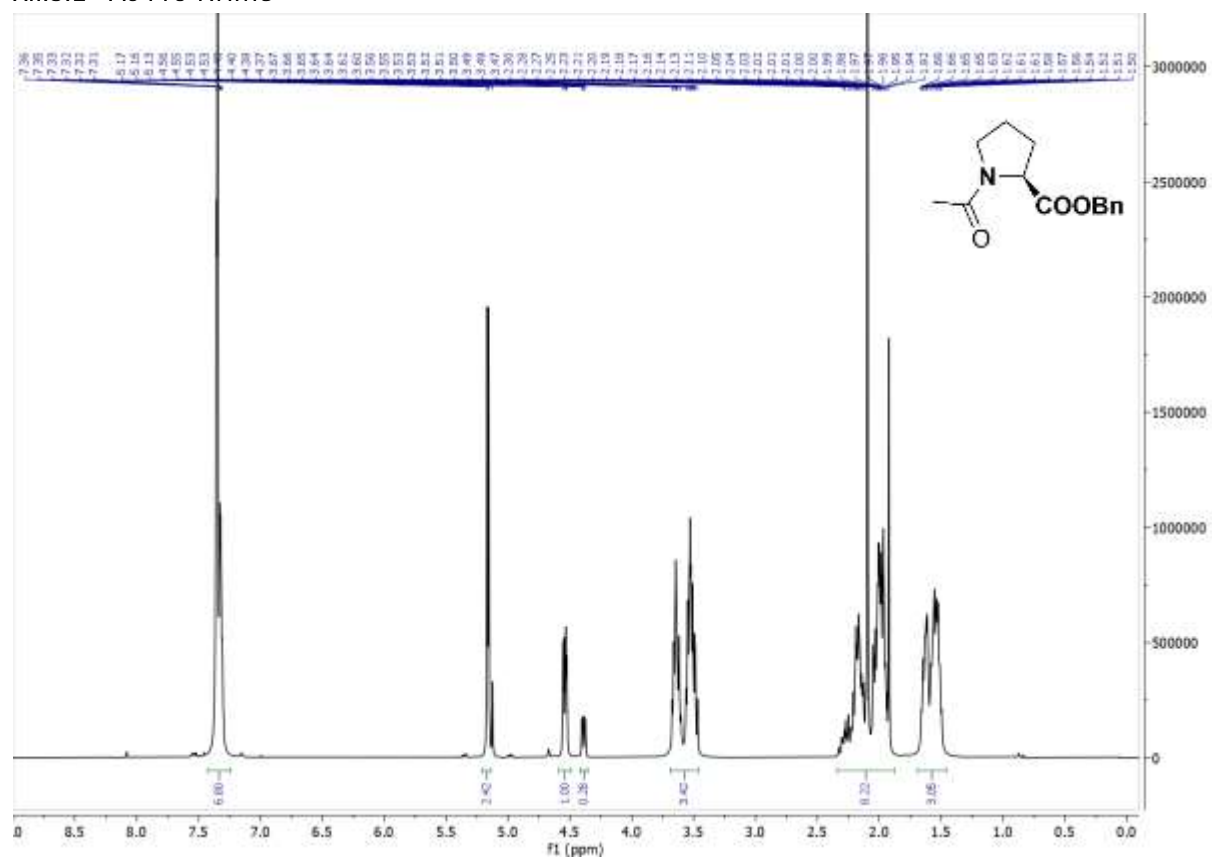

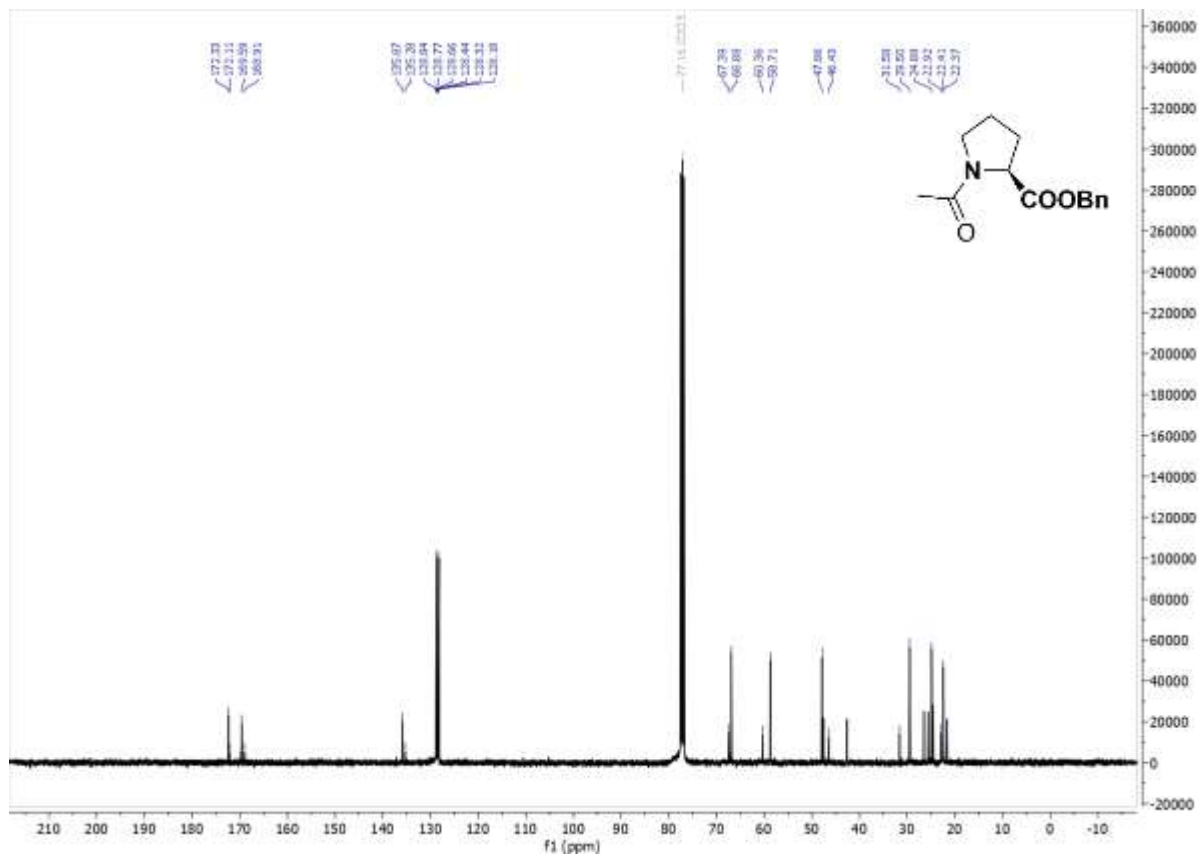

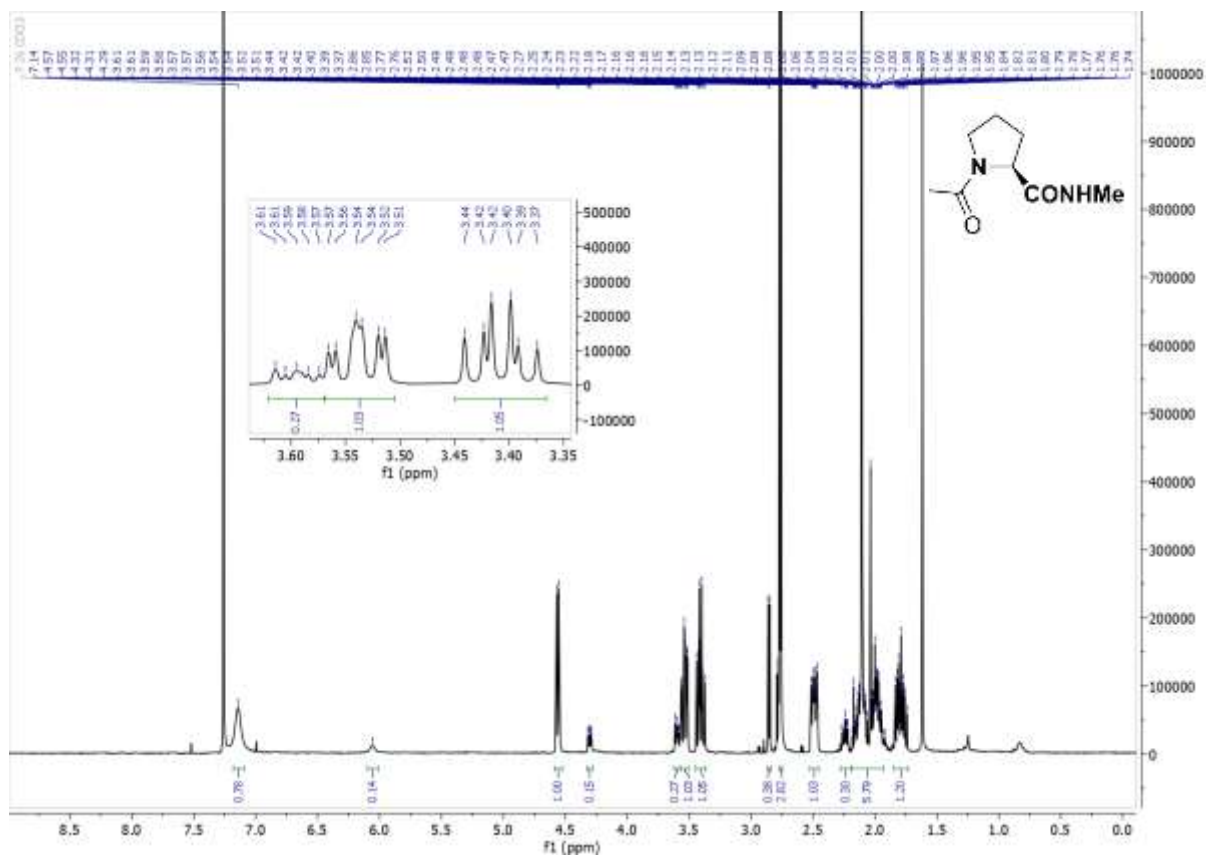

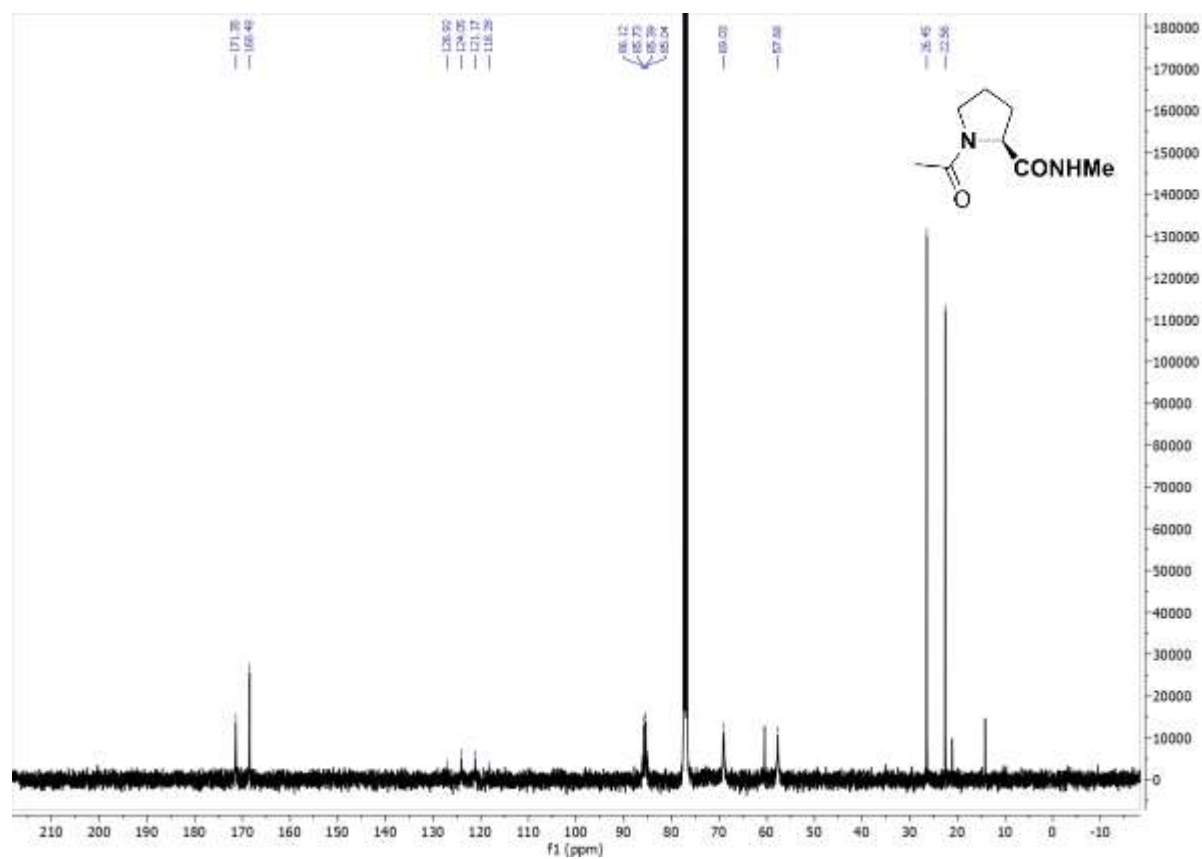

### XII.3.2 Ac-CF<sub>3</sub>ΨPro-NHMe

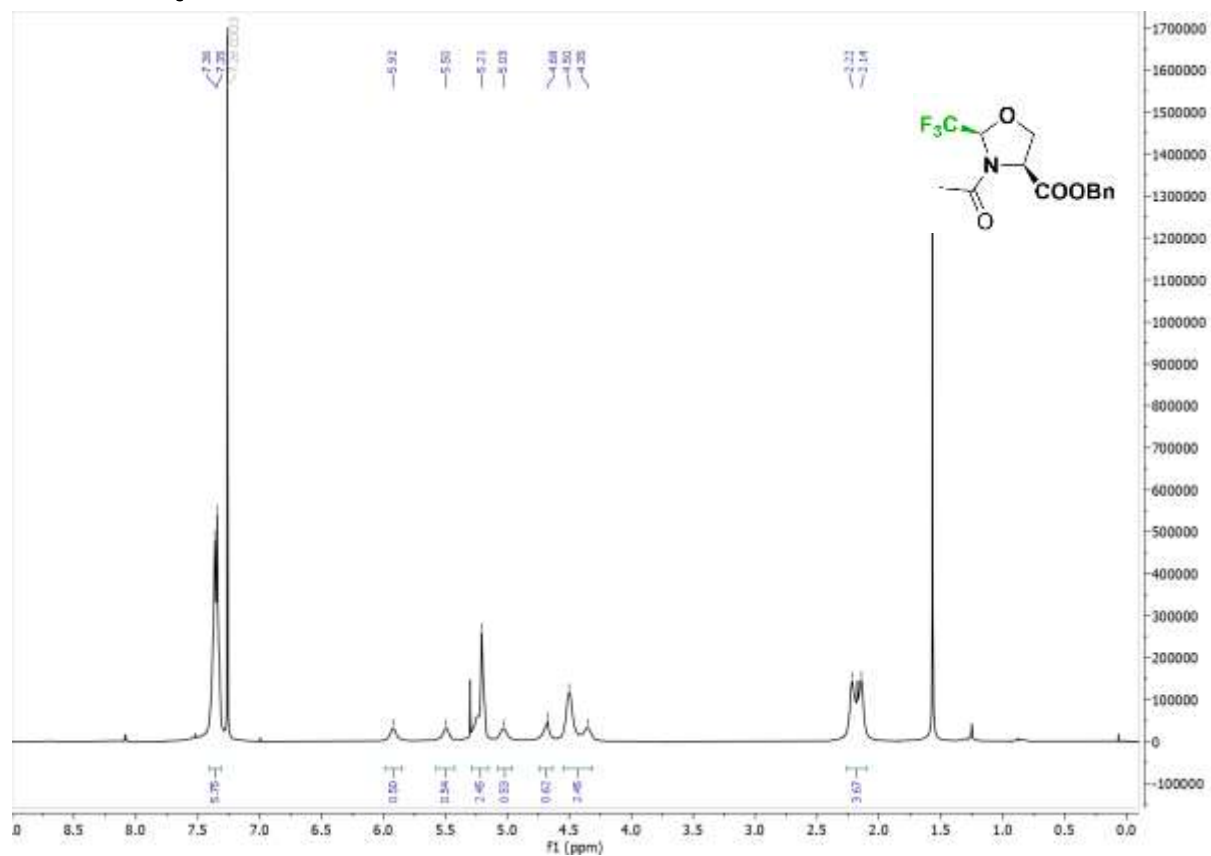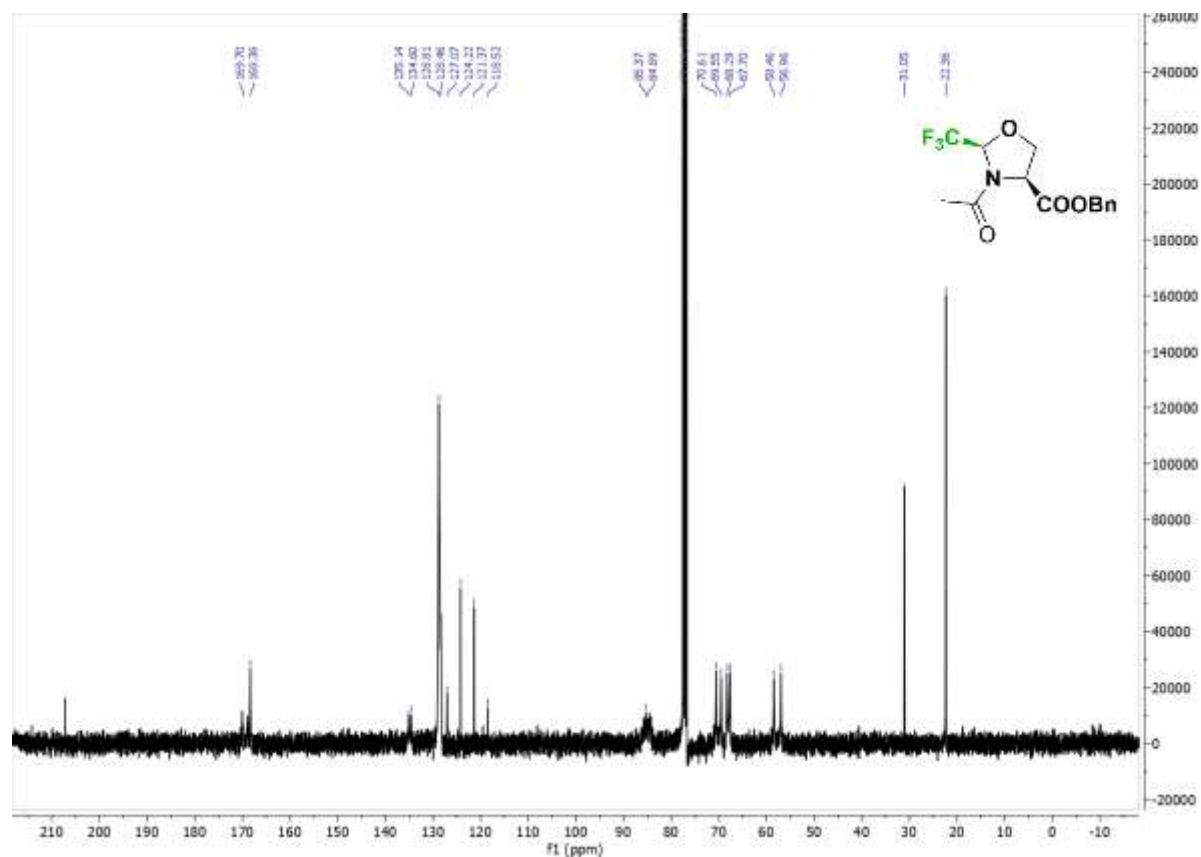

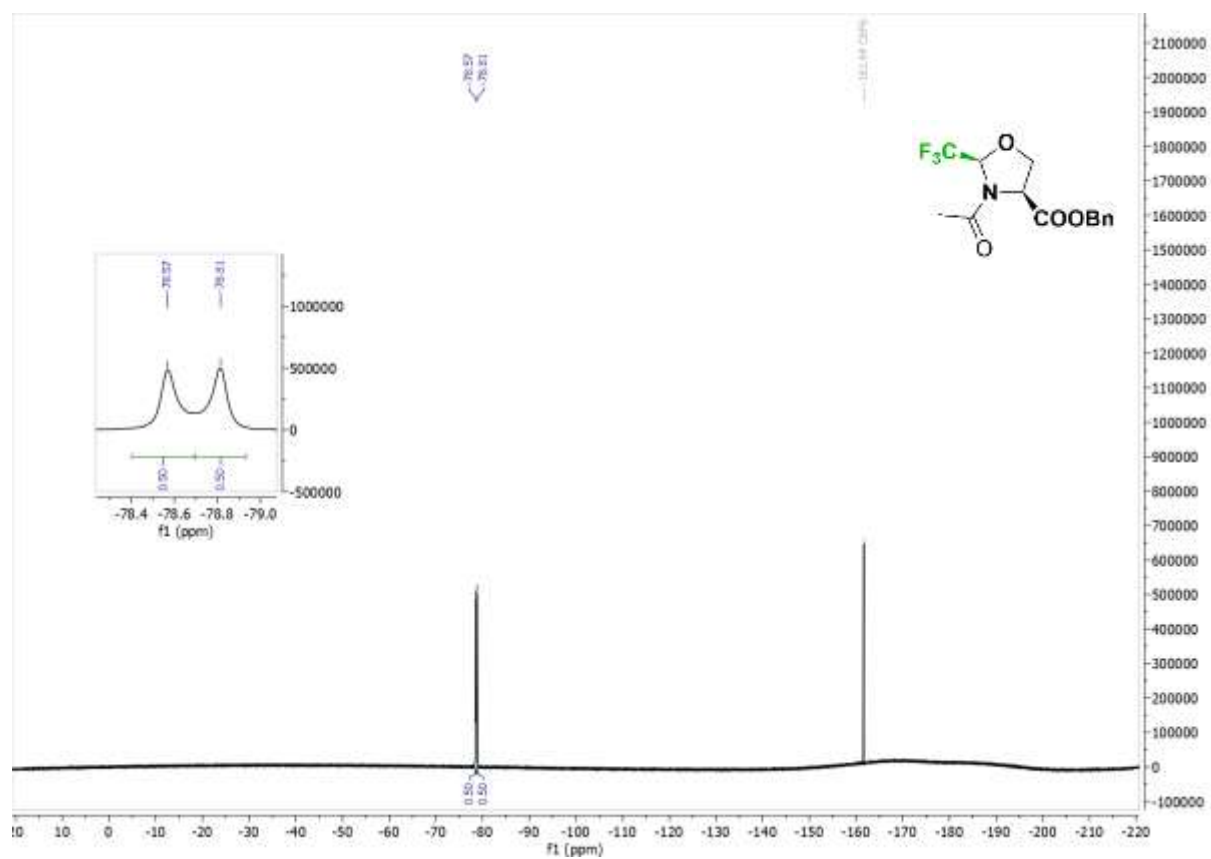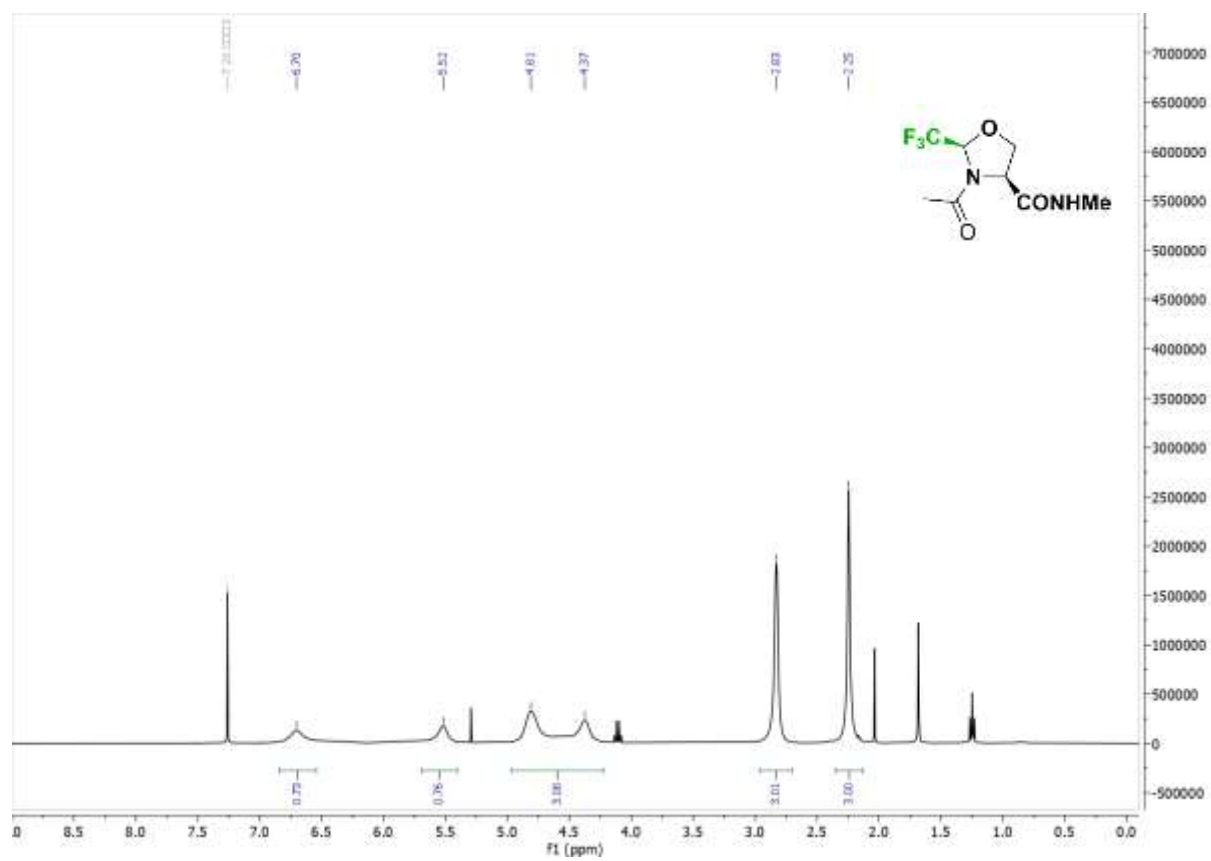

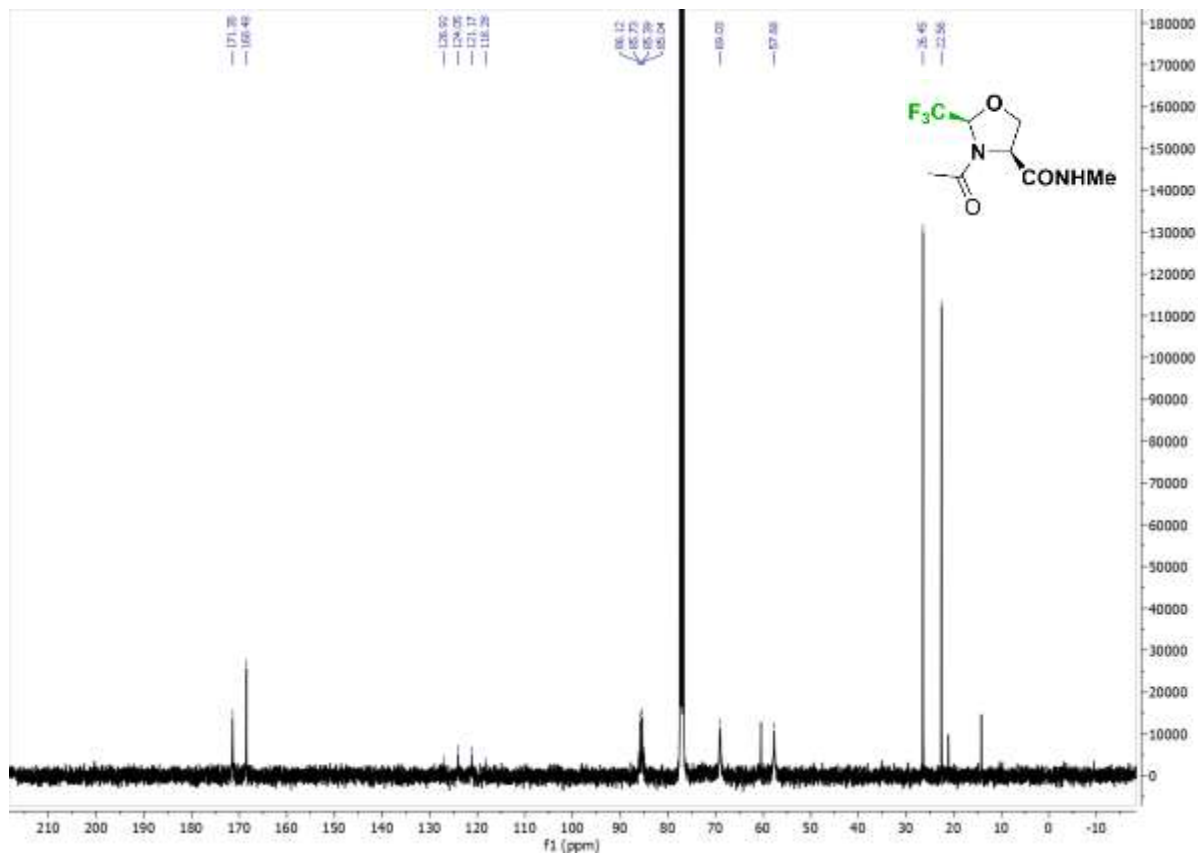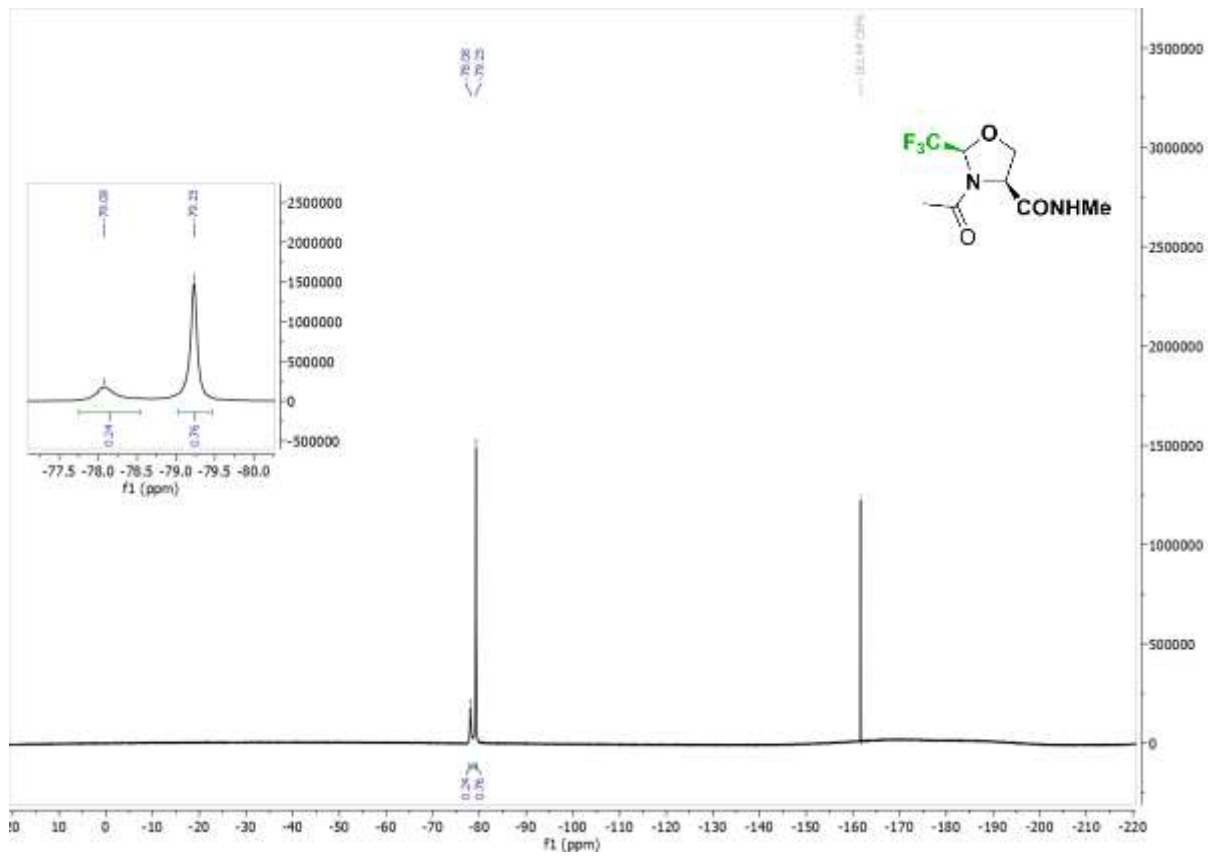

### XIII. BIBLIOGRAPHY

---

- (1) Chaume, G.; Barbeau, O.; Lesot, P.; Brigaud, T. Synthesis of 2-Trifluoromethyl-1,3-Oxazolidines as Hydrolytically Stable Pseudoprolines. *J. Org. Chem.* **2010**, *75* (12), 4135–4145. <https://doi.org/10.1021/jo100518t>.
- (2) Das, S.; Li, Y.; Bornschein, C.; Pisiewicz, S.; Kiersch, K.; Michalik, D.; Gallou, F.; Junge, K.; Beller, M. Selective Rhodium-Catalyzed Reduction of Tertiary Amides in Amino Acid Esters and Peptides. *Angewandte Chemie International Edition* **2015**, *54* (42), 12389–12393. <https://doi.org/10.1002/anie.201503584>.
- (3) Rigaku, O. D. *CrysAlis PRO*. 2021, Rigaku Oxford Diffraction, Yarnton, England.
- (4) Sheldrick, G. M. A Short History of SHELX. *Acta Cryst A* **2008**, *64* (1), 112–122. <https://doi.org/10.1107/S0108767307043930>.
- (5) Sheldrick, G. M. SHELXT – Integrated Space-Group and Crystal-Structure Determination. *Acta Cryst A* **2015**, *71* (1), 3–8. <https://doi.org/10.1107/S2053273314026370>.
